# Supplementary material for: Synergy from gene expression and network mining (SynGeNet) method predicts synergistic drug combinations for diverse melanoma genomic subtypes
Source: PubMed Central journal article supplement (PMC6391384; doi:10.1038/s41540-019-0085-4), 2019-02-26
Supplement: 41540_2019_85_MOESM1_ESM.pdf [file 41540_2019_85_MOESM1_ESM.pdf]

## Supplemental Figures

**Supplemental Figure S1. Signaling networks and respective drug combination predictions for four genomic subtypes of melanoma.** A) Using RNAseq gene expression data from the TCGA SKCM database and protein-protein interactions from the BIOGRID database, signaling networks were generated using the belief propagation using co-mutated genes as root genes for each respective genomic subtype: *BRAF* mutant, *NRAS* mutant, *NF1* mutant and Triple wild type (TWT) melanoma. The size of the network nodes are weighted to the average centrality metrics and the node color is scaled to gene expression (green: up-regulated, red: down-regulated). B) Venn diagrams visualizing overlap among four genomic subtypes of melanoma for corresponding co-mutated root genes, signaling networks generated and drug combinations predicted using mutation and gene expression data from the TCGA SKCM dataset.

# A

## *BRAF*

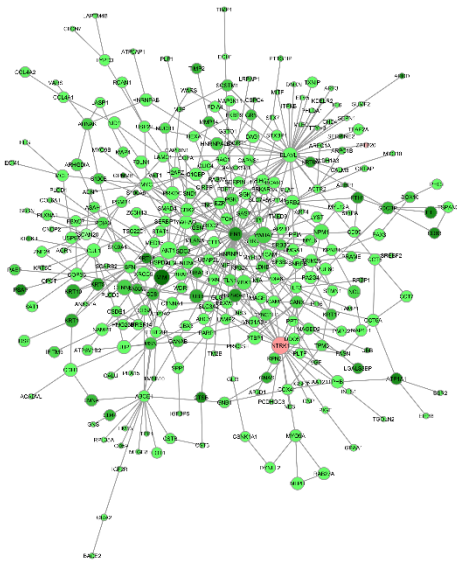

## *NRAS*

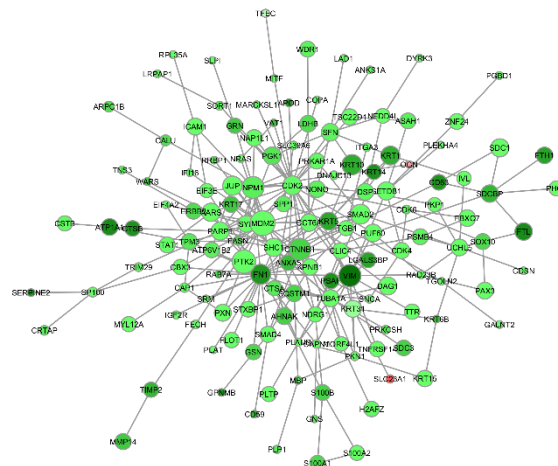

## *NF1*

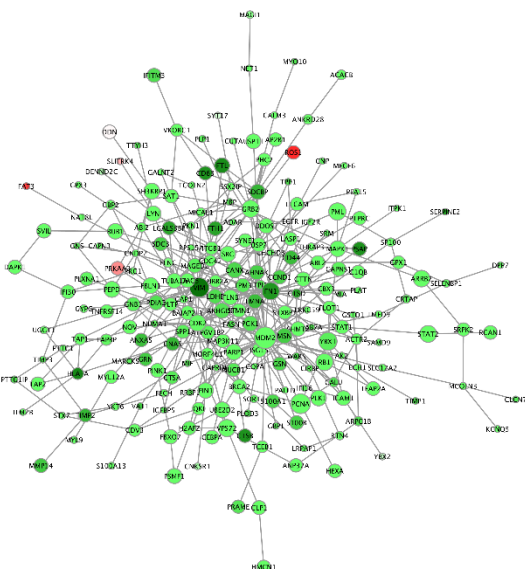

## TWT

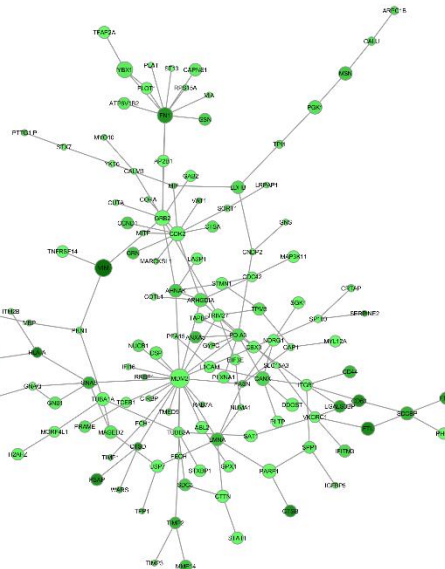

B

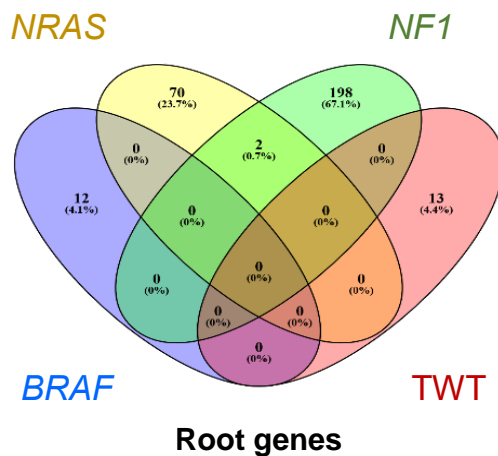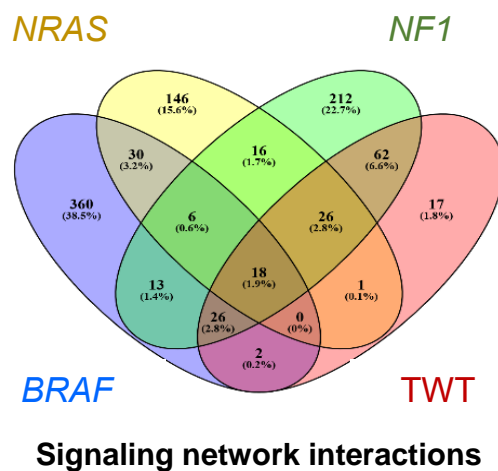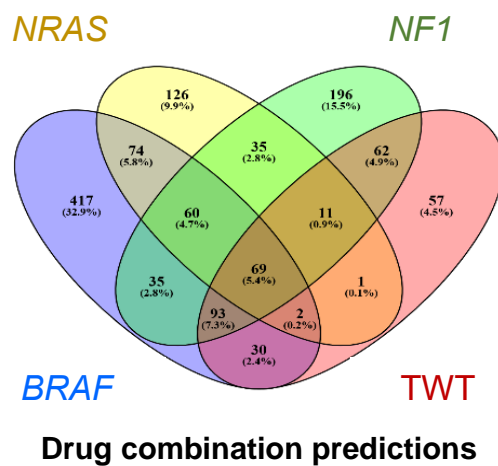

**Supplemental Figure S2. Overlap among signaling networks and drug combination predictions using melanoma primary tumor GEO dataset GSE15605.** Venn diagrams visualizing overlap among four genomic subtypes of melanoma generated using the GEO GSE15605 for A) signaling network interactions and B) drug combination predictions. Venn diagrams visualizing overlap among four genomic subtypes of melanoma generated using the GEO GSE15605 for A) signaling network interactions and B) drug combination predictions.

A

## GEO signaling network interactions

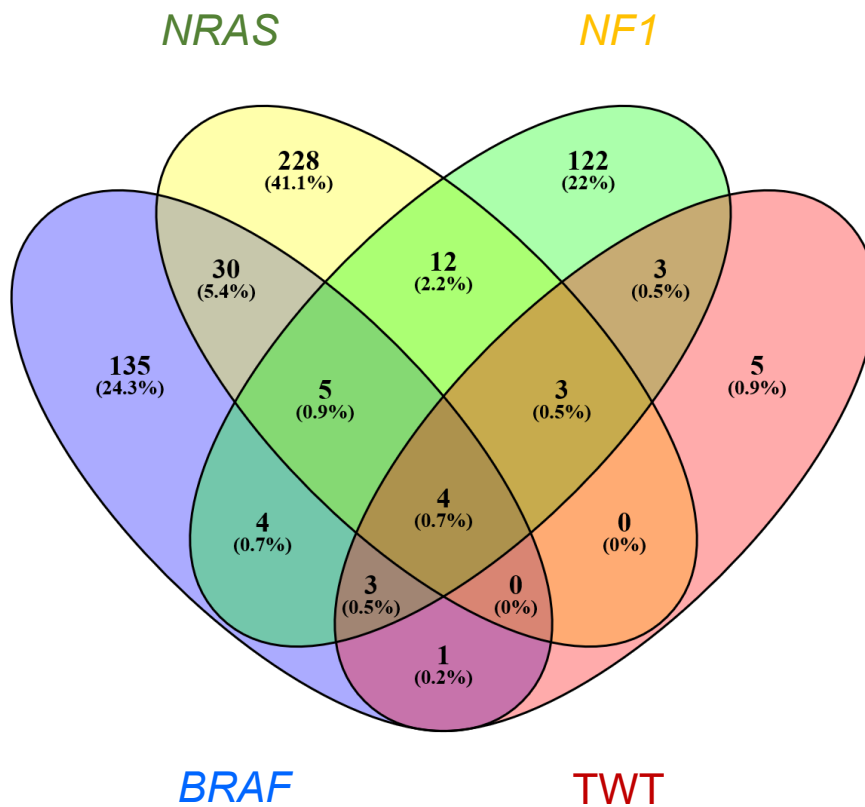

B

## GEO drug combinations

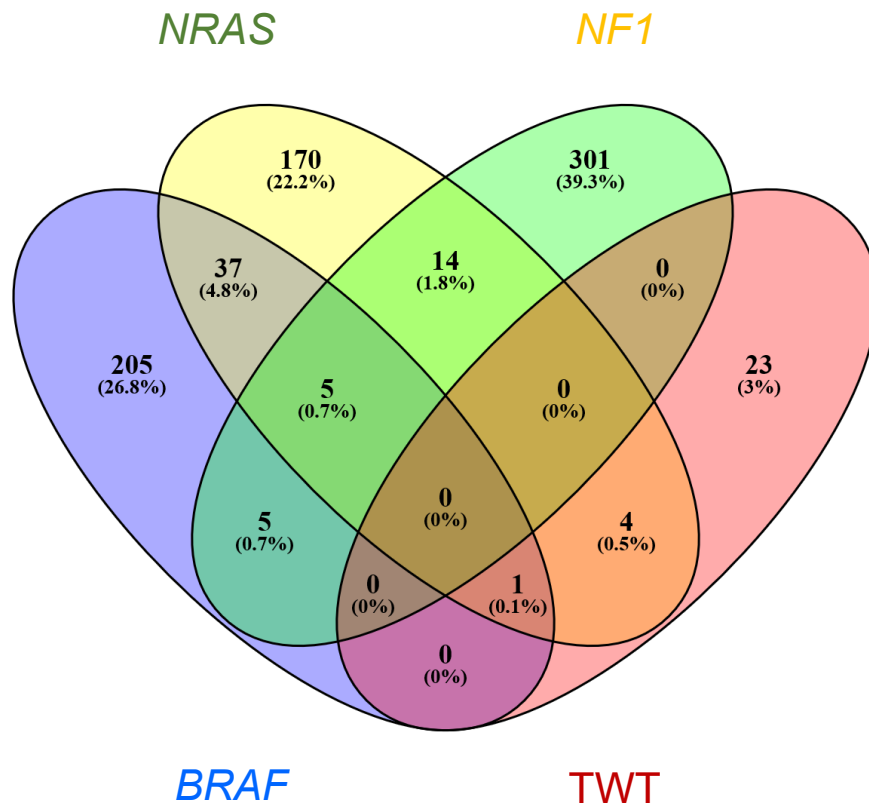

**Supplemental Figure S3. Relationships between major drug class categories among predicted drug combinations for melanoma genomic subtypes.** Constituent drugs in predicted drug combinations were mapped to drug class categories from the KEGG Drug database, and drug combination patterns among major drug classes are visualized via circos plots for each melanoma genomic subtype defined in the TCGA SKCM dataset for *BRAF* mutant (top left), *NRAS* mutant (top right), *NF1* mutant (bottom left) and Triple wild type (bottom right) melanoma.

*BRAF*

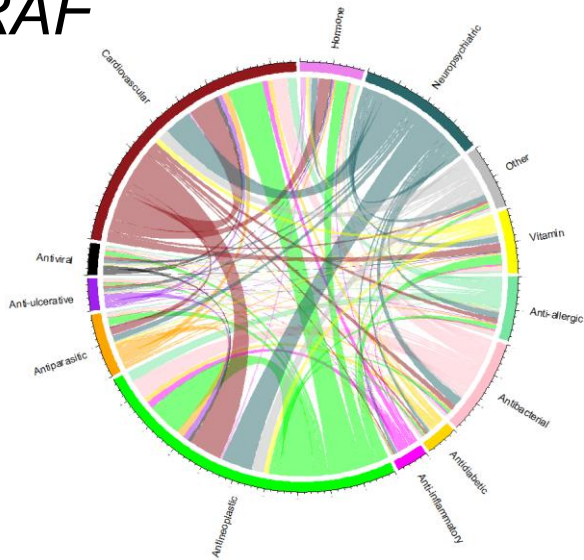

*NRAS*

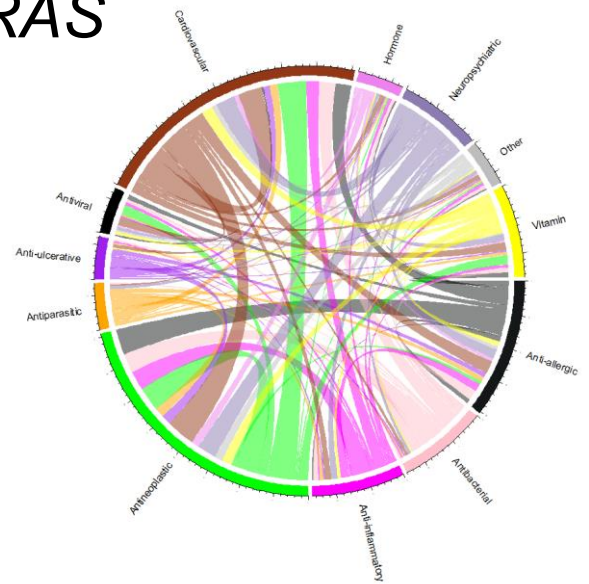

*NF1*

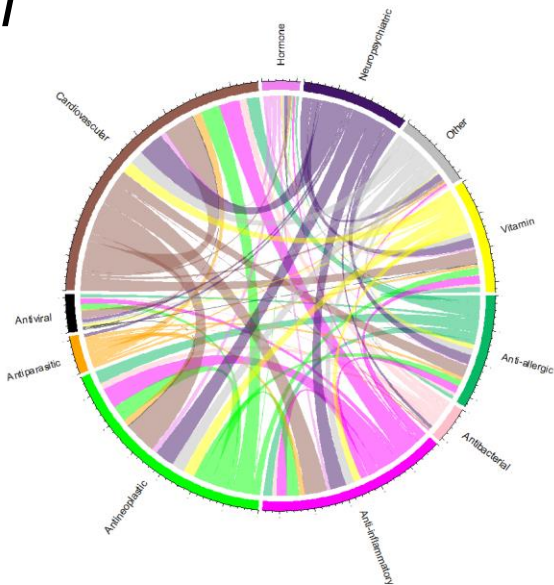

TWT

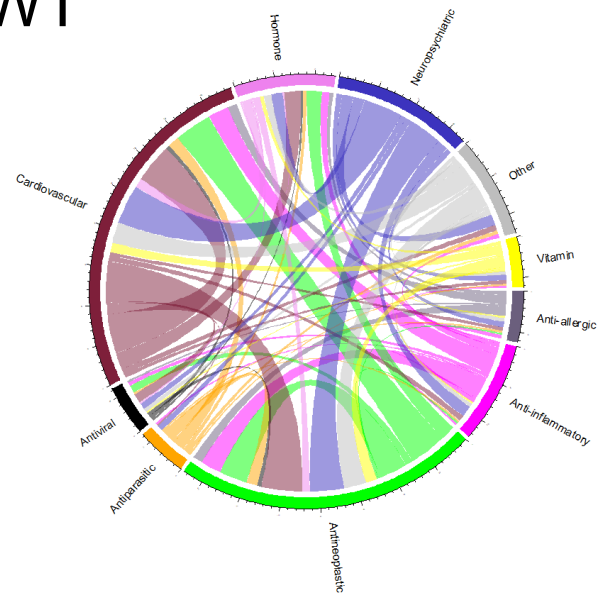

**Supplemental Figure S4. Leave one out analysis to test signaling network size robustness.** Signaling network sizes (number of protein-protein interactions) and percent overlap with the original network are shown for networks generated using two sources of melanoma root genes, including 28 melanoma-associated genes from the DisGeNet database (A and B, respectively) and 39 genes found to be frequently mutated in melanoma tumors from the TCGA SKCM database (C and D, respectively). Both networks used the same set of differentially expressed genes defined between all primary melanoma tumors vs. normal skin samples from GEO dataset GSE15605 as well as the same parameters for network construction using the belief propagation algorithm. The leftmost bar shows the resulting signaling network size for all root genes in both cases (Total), and each subsequent bar shows the effect of removing one root gene from either list. Of note, only two root genes with non-loss of function mutations are shared between the gene sets obtained from DisGeNet and TCGA SKCM databases, including BRAF and NRAS.

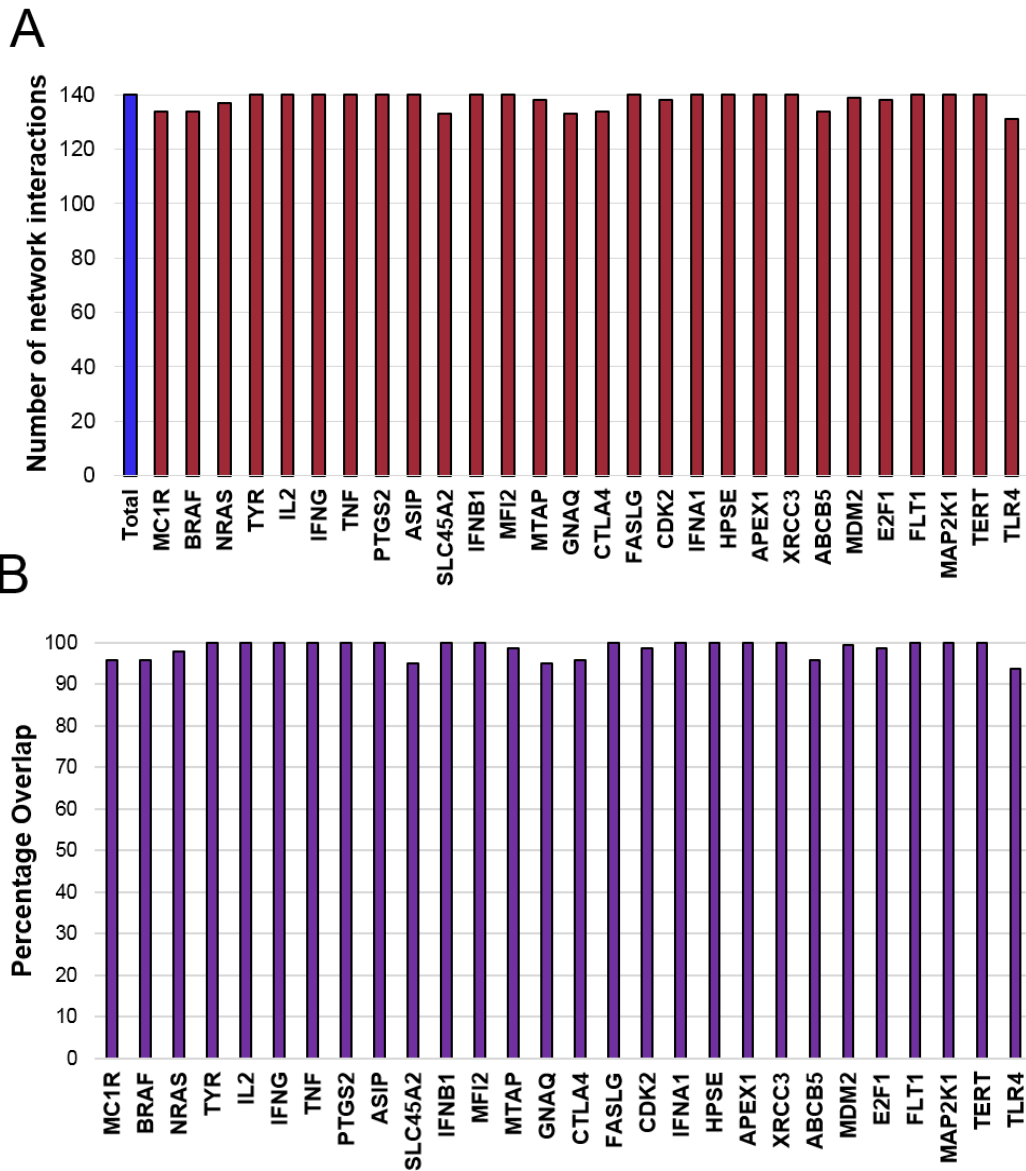

C

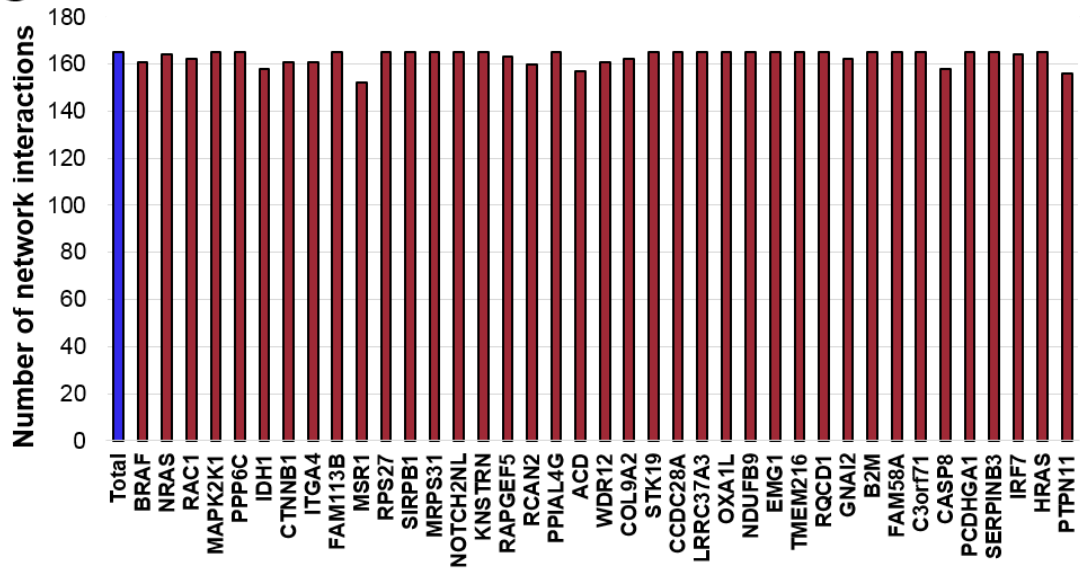

D

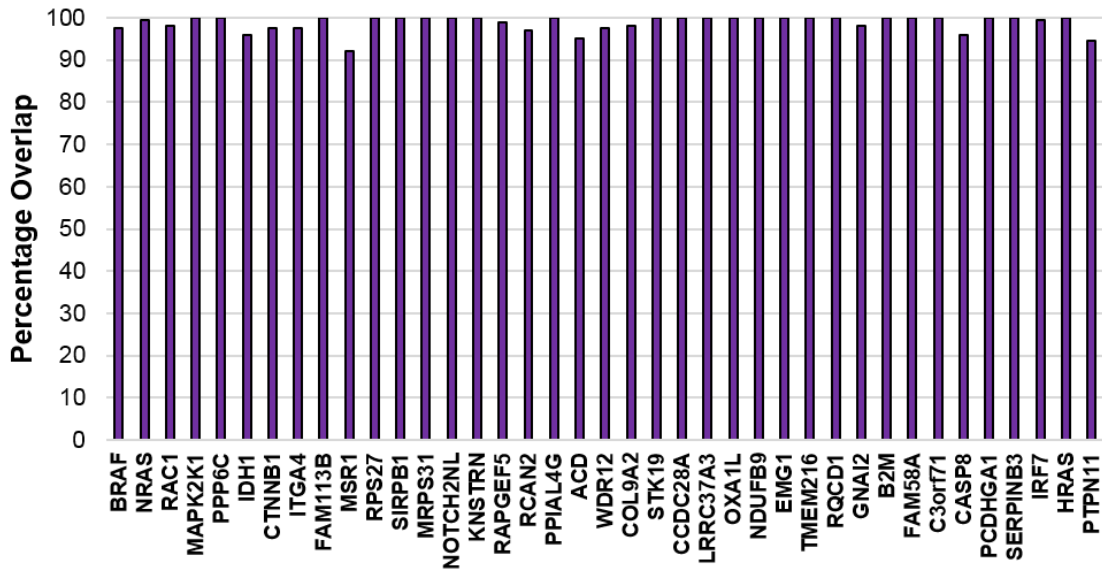

**Supplemental Figure S5. Comparison of drug community clustering algorithms.** Each clustering algorithm was applied to a Pearson correlation matrix of drug-induced gene expression profiles for 633 FDA approved drugs in the LINCS database, including: affinity propagation (AP, n=37 clusters), partitioning around medoids (PAMK, n=10), hierarchical clustering (HC, n=26) and density based clustering of applications with noise (DBSCAN, n=4). Four internal measures were used to assess the performance of the clustering algorithms, three of which should be maximized (green): Average between cluster distance/within cluster distance (A); Dunn 2 index, which describes the minimum average dissimilarity between two clusters / maximum average within cluster similarity (B); Average silhouette width, estimates the average distance between clusters; and one that is sought to be minimized (orange): within cluster sum of squares (D).

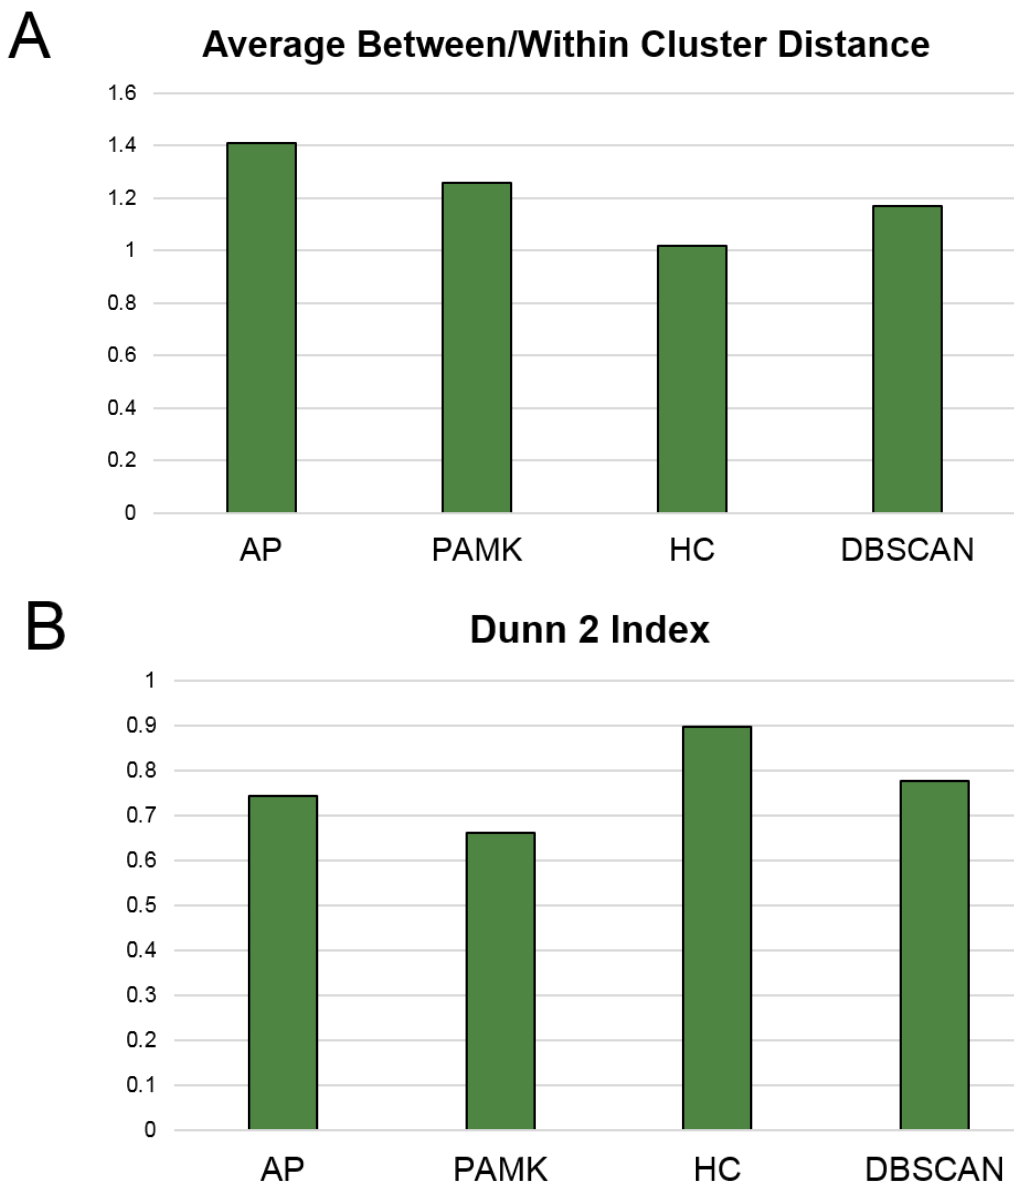



C

Average Silhouette Width

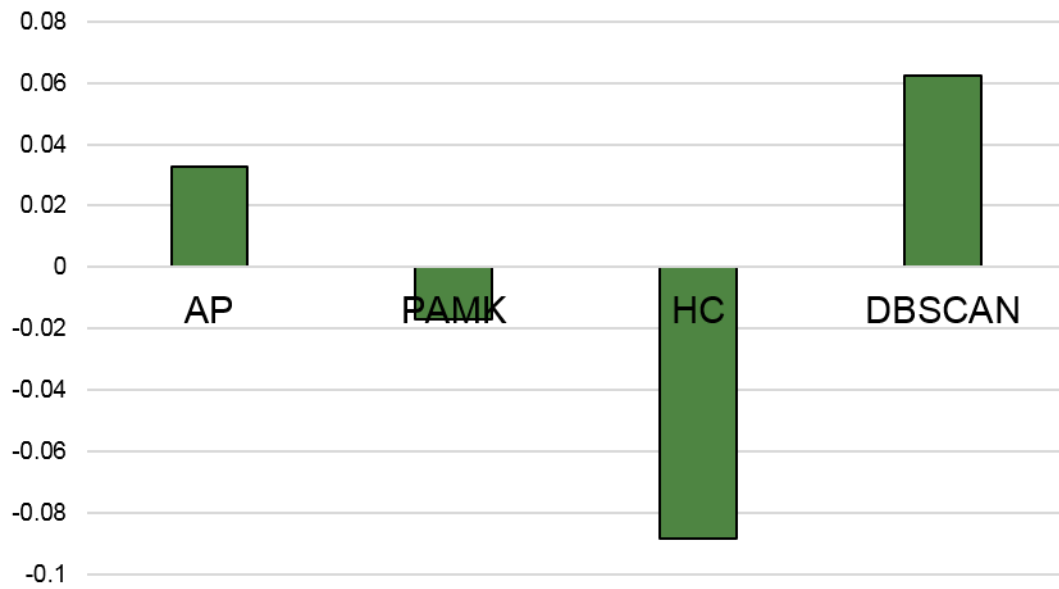

D

Within Cluster Sum of Squares

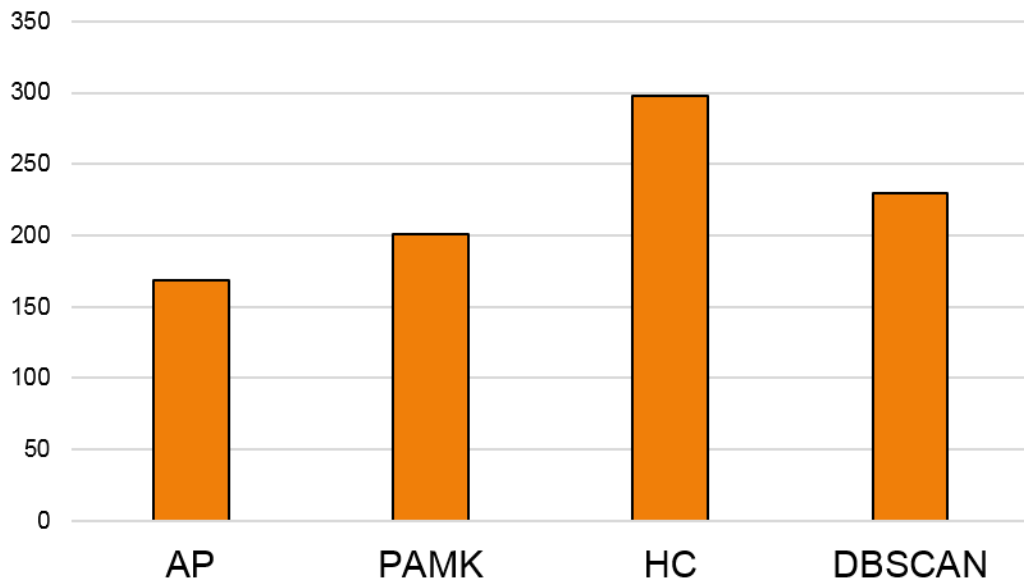

**Supplemental Figure S6. Drug communities determined by AP clustering.** Drug communities structures generated by the affinity propagation algorithm for two generalized melanoma networks using the DisGeNet dataset genes (A) and significantly mutated genes in the TCGA SKCM dataset (B) as the root gene sets to construct melanoma disease signaling networks.

## A DisGeNet melanoma drug community network

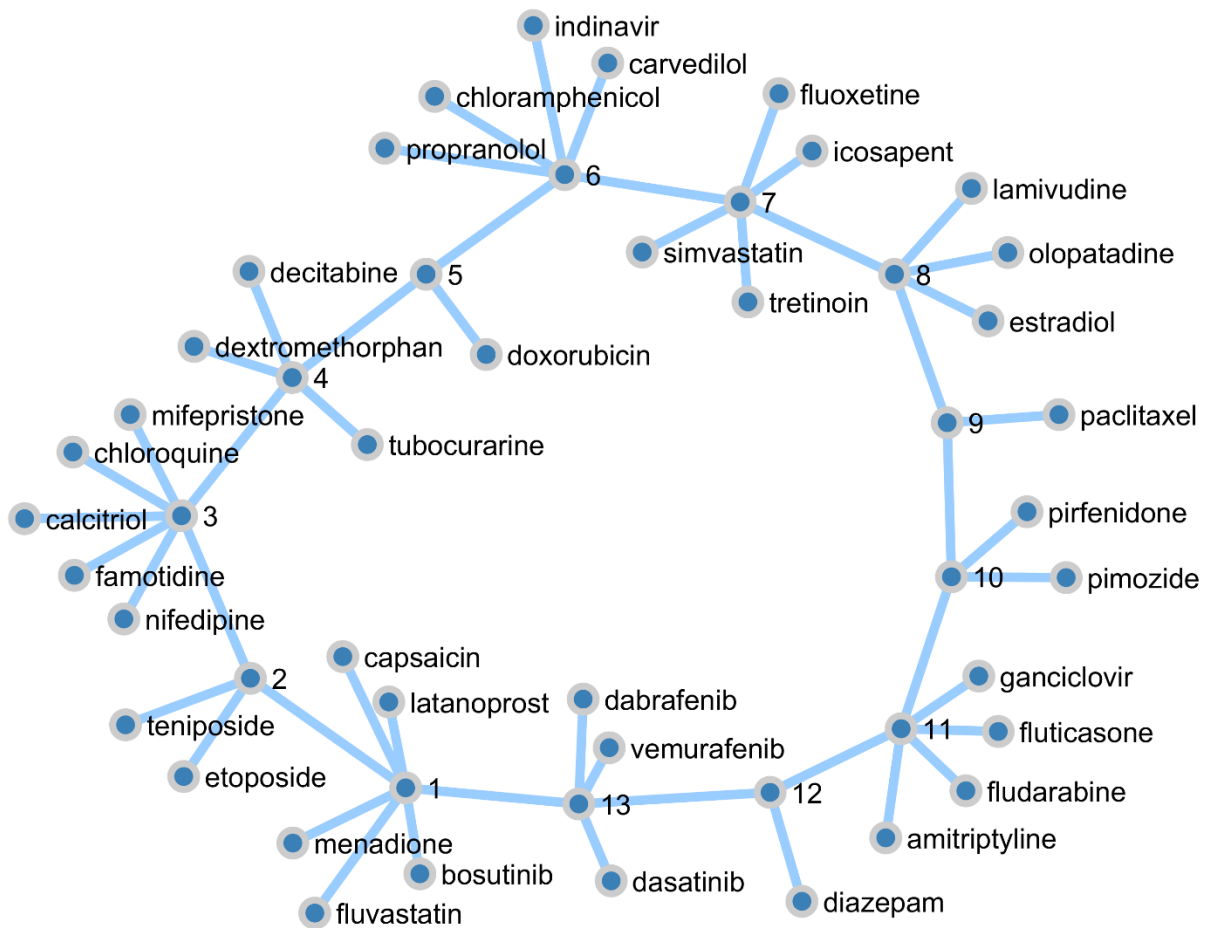

## B SMG melanoma drug community network

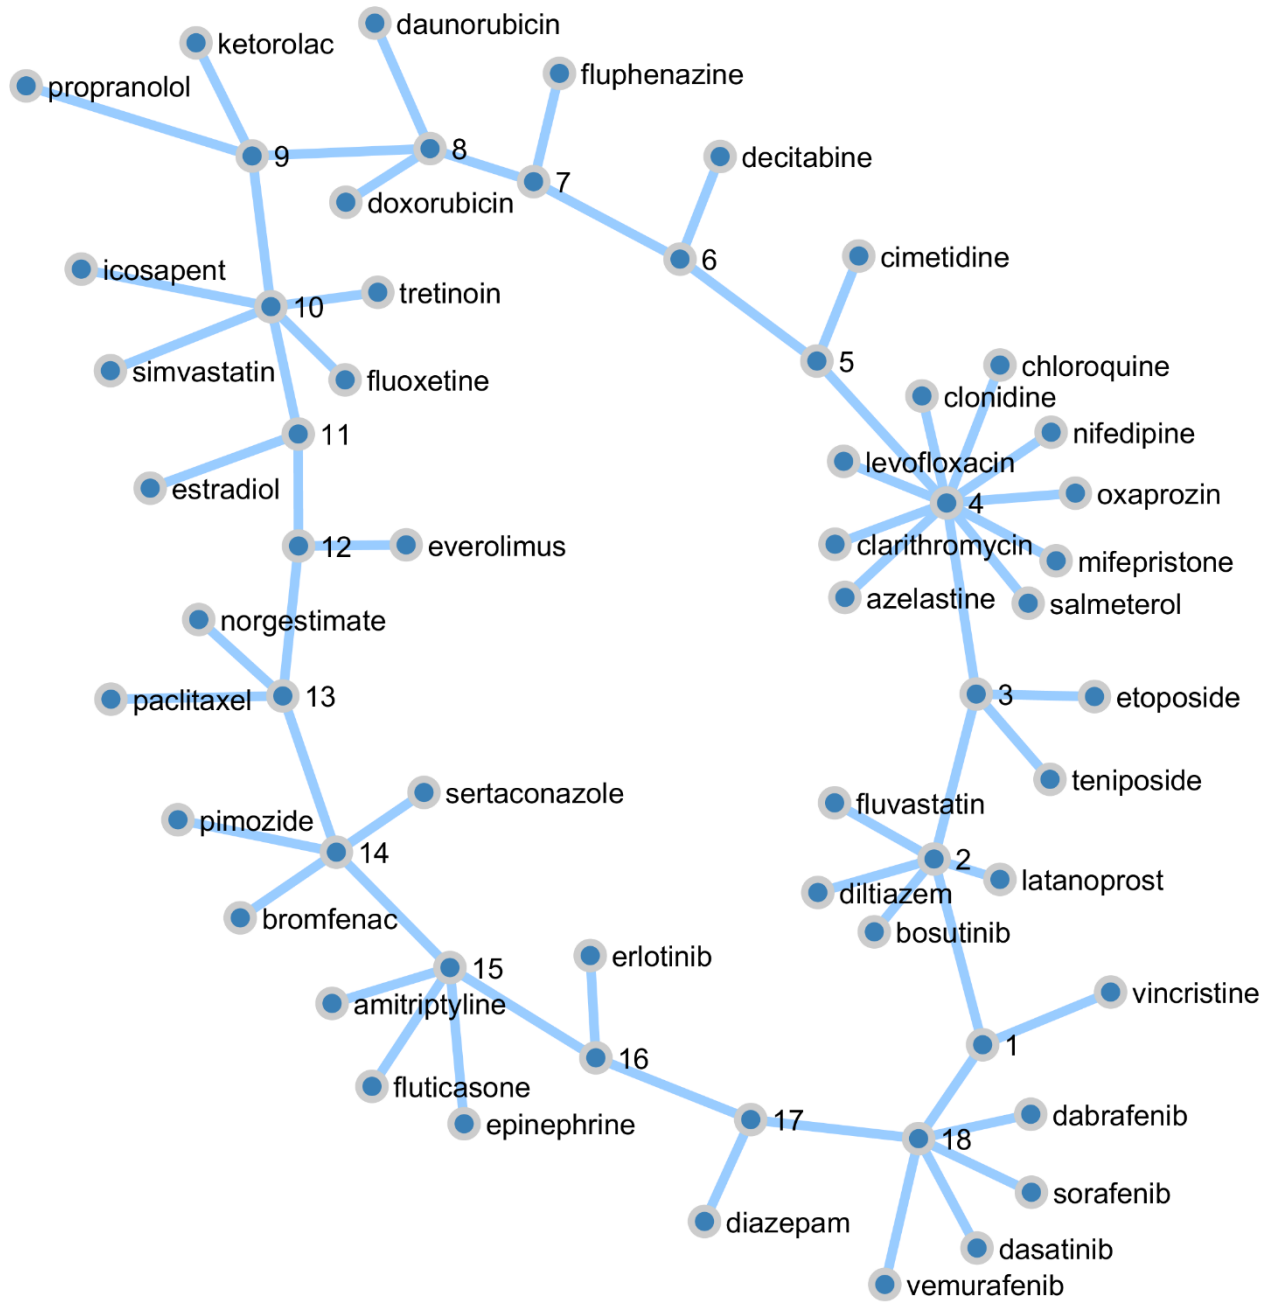

**Supplemental Figure S7. Drug combination predictions as a function of signaling network size.** The number of predicted drug combinations is shown for increasing signaling network size via incremental increases in the lambda parameter that regulates protein-protein interactions (strength of evidence) and gene expression (increased fold change) for network nodes for each melanoma genomic subtype defined in the TCGA SKCM dataset: *BRAF* mutant (A), *NRAS* mutant (B), *NF1* mutant (C) and Triple wild type (D) melanoma.

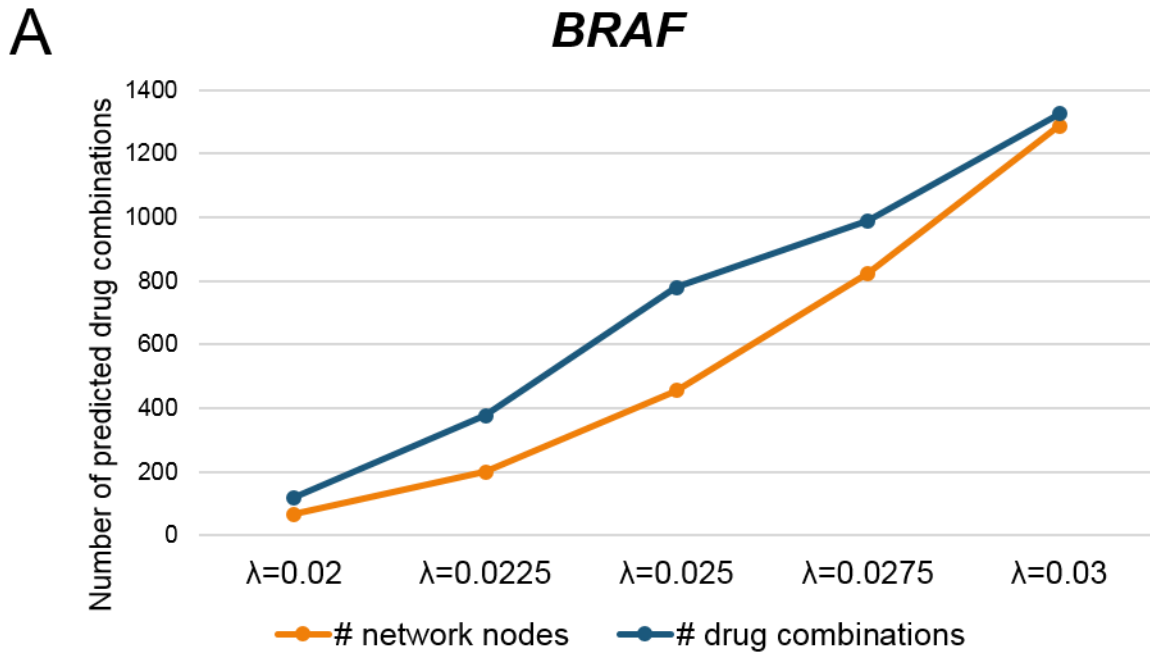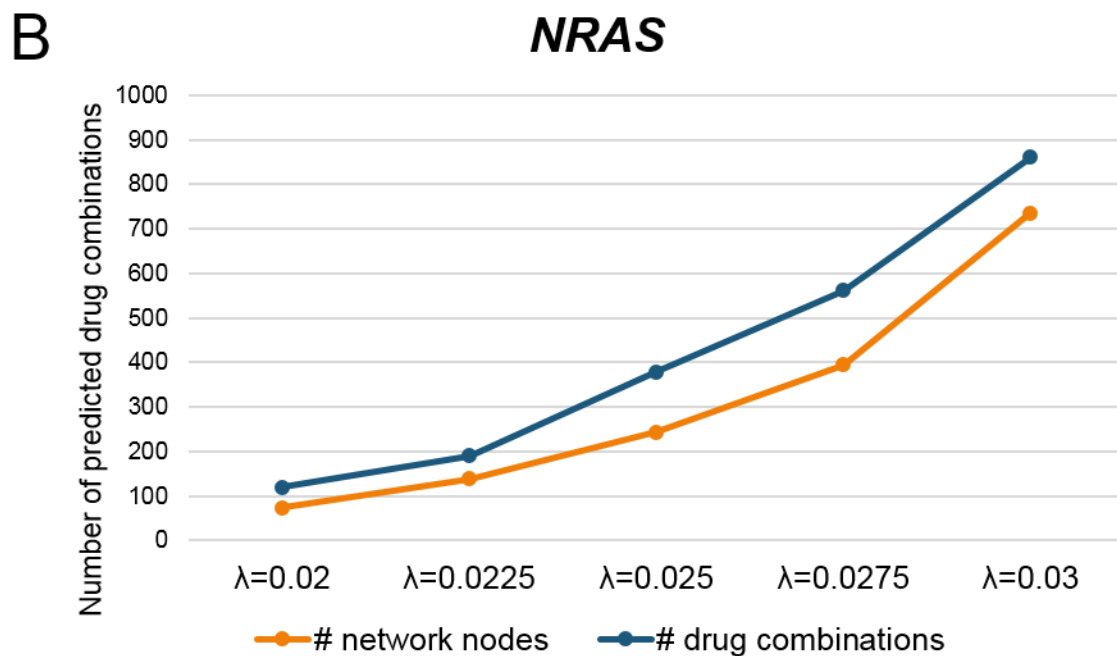

**C****NF1**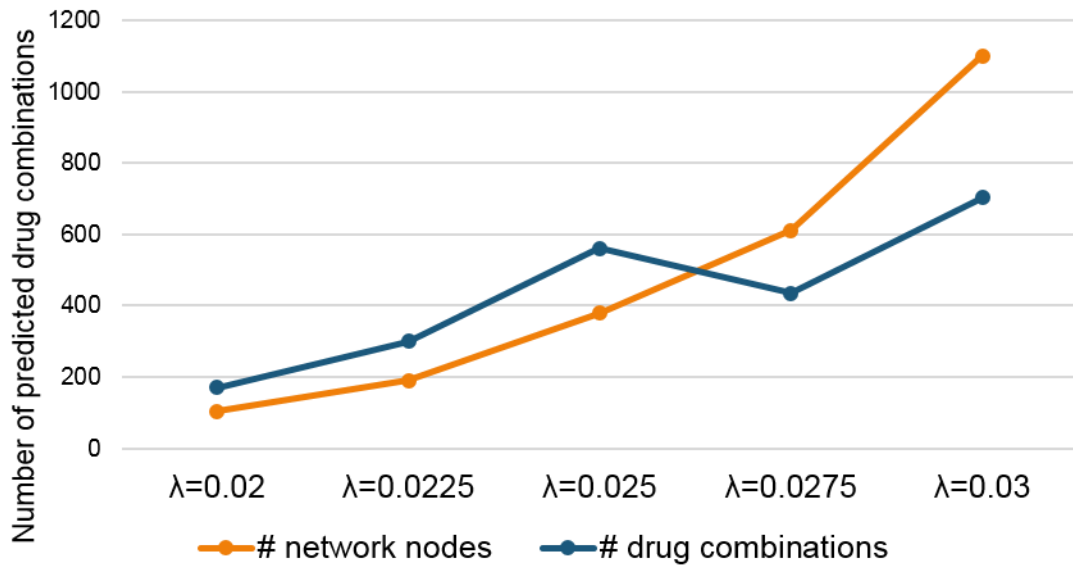**D****TWT**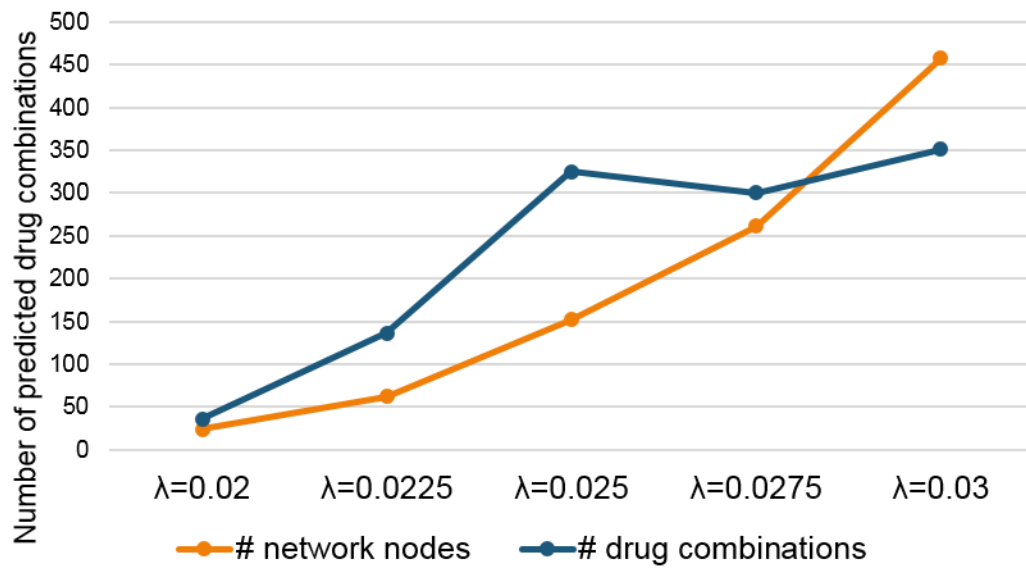

**Supplemental Figure S8. Comparison of random drug pairs and combinations from model components.** A) Using the combinatorial drug screening validation dataset results for each melanoma genomic subtype, the positive predictive values are shown for the original drug combination predictions, two general melanoma models (SMG= significantly mutated genes, DGN = DiSGeNEt genes) and random drug pairs from a set of overlapping drug combinations between the validation dataset and the set of all FDA approved therapies modeled in our method. B) The number of validated drug combinations is reported for each melanoma genomic subtype predicted by our method (original) and using only differentially expressed genes (DE) or root genes (Root) to model the signaling networks by our method.

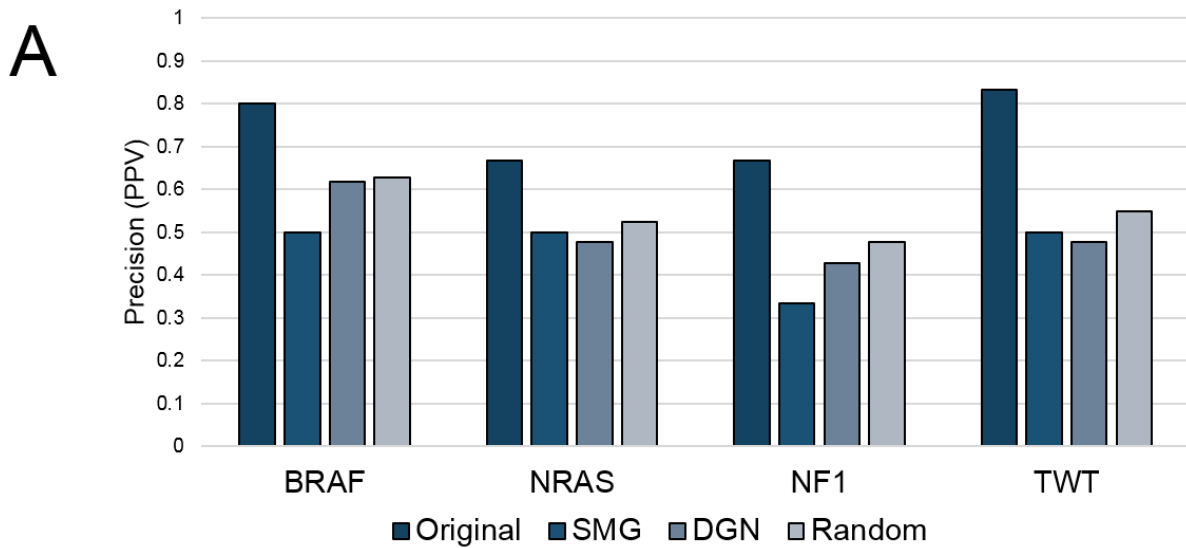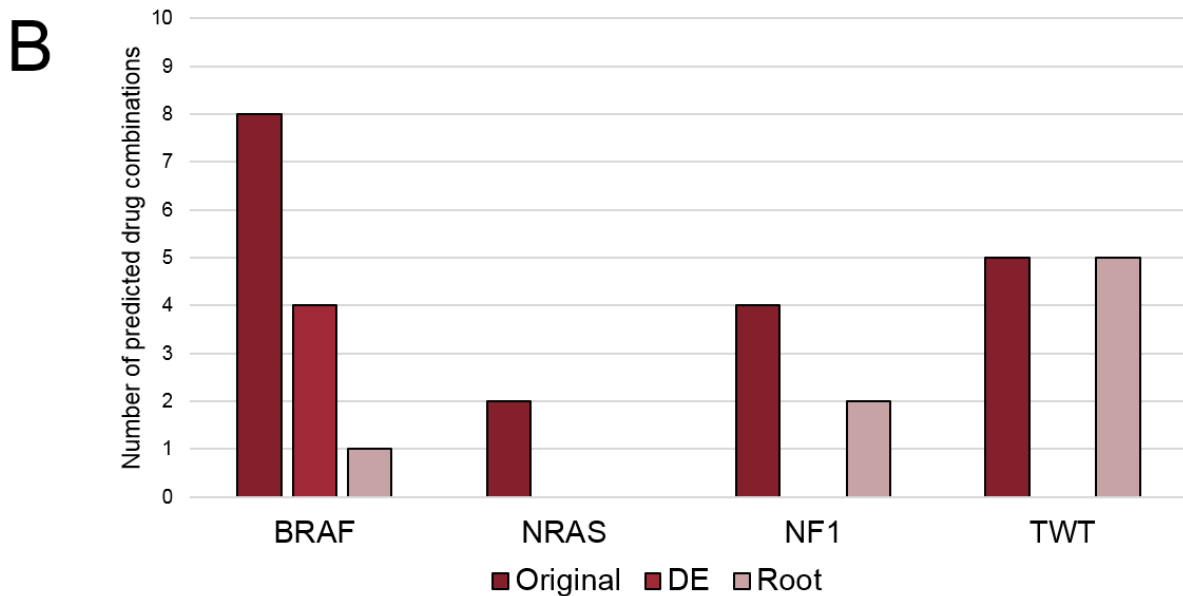

**Supplemental Figure S9. Random re-wiring of signaling networks.** The number of true positive and false positive drug combination predictions from the set of validated drug combinations in the BRAF melanoma signaling network is shown for the original signaling network and for 100 random permutations of protein-protein interaction pairs fixed to the size of the original signaling networks.

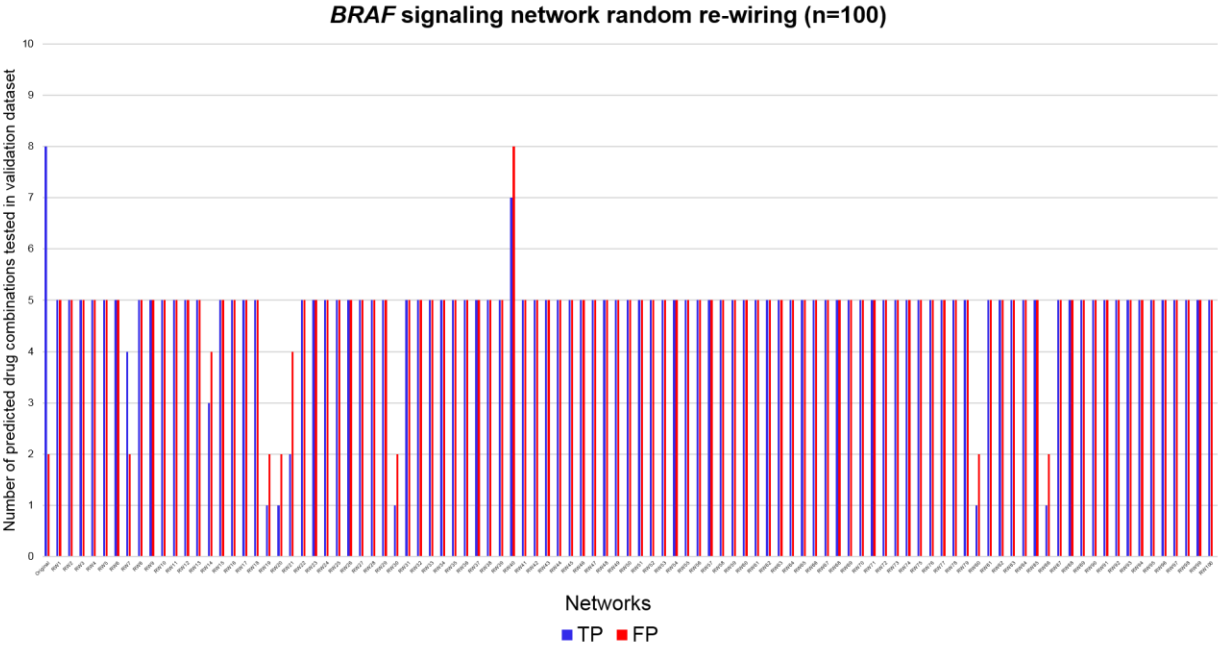

**Supplemental Figure S10. Sample-to-sample distances based on A375 melanoma cell line RNA-seq gene expression data across different drug treatment groups.** Sample-to-sample distances characterized by global gene expression patterns were determined by three complementary dimensionality reduction techniques using rlog-transformed RNAseq counts, including: A) hierarchical clustering with Euclidean distance, B) multi-dimensional scaling (MDS) and C) principal components analysis (PCA). DMSO = dimethyl sulfoxide vehicle control; Vem = vemurafenib; Tre = Tretinoin; VemTre = Vemurafenib+Tretinoin combination.

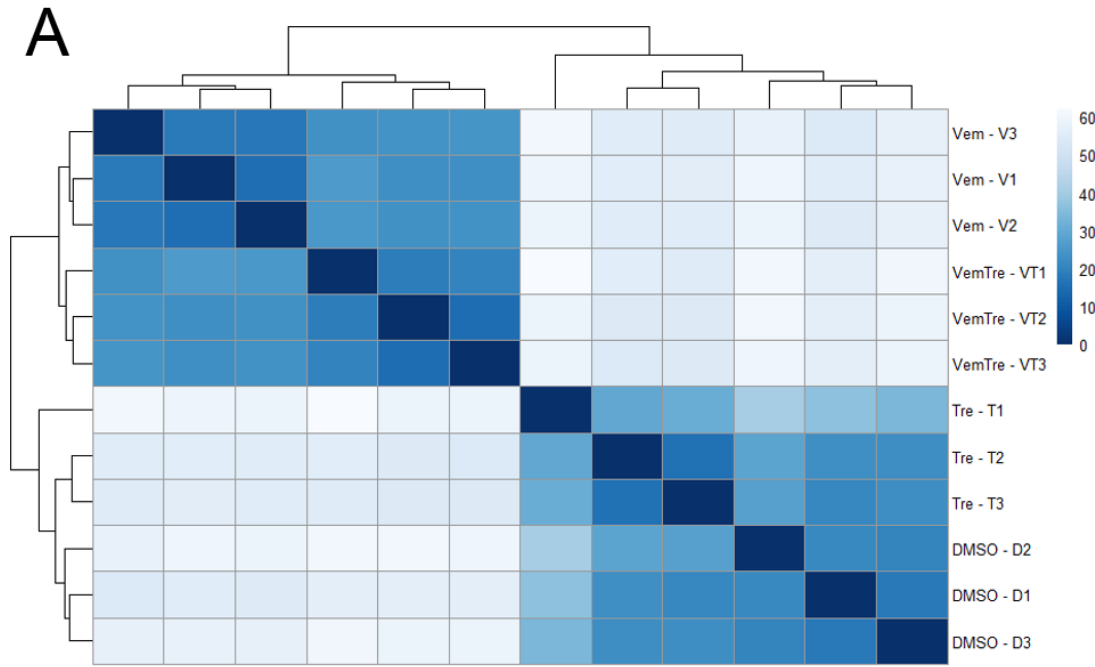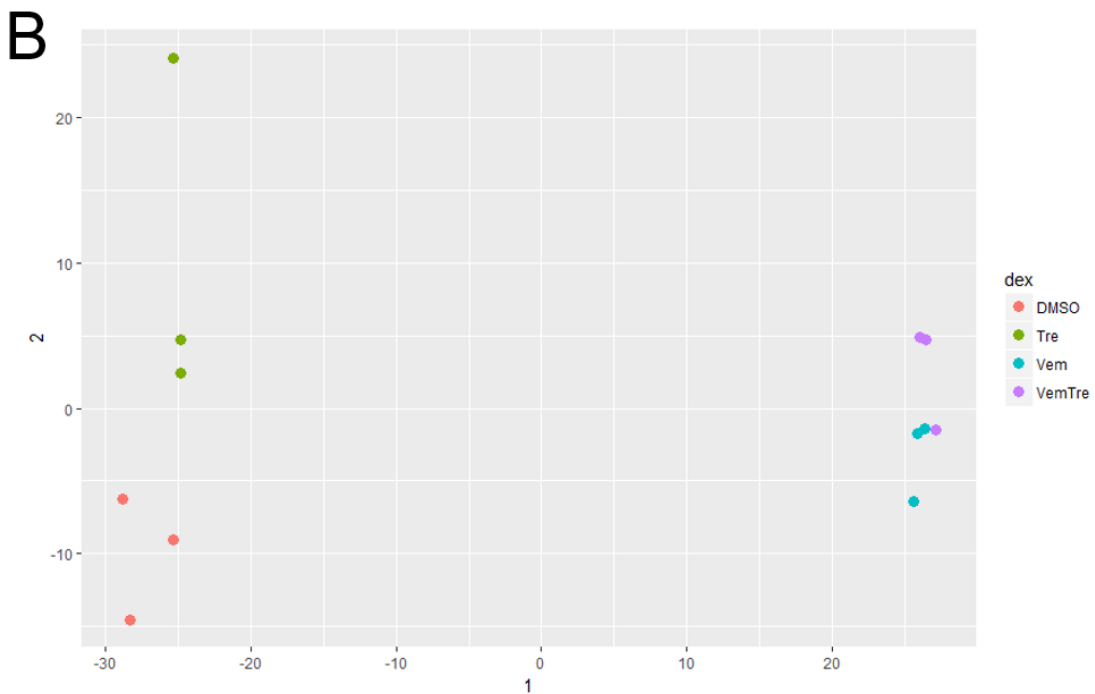



C

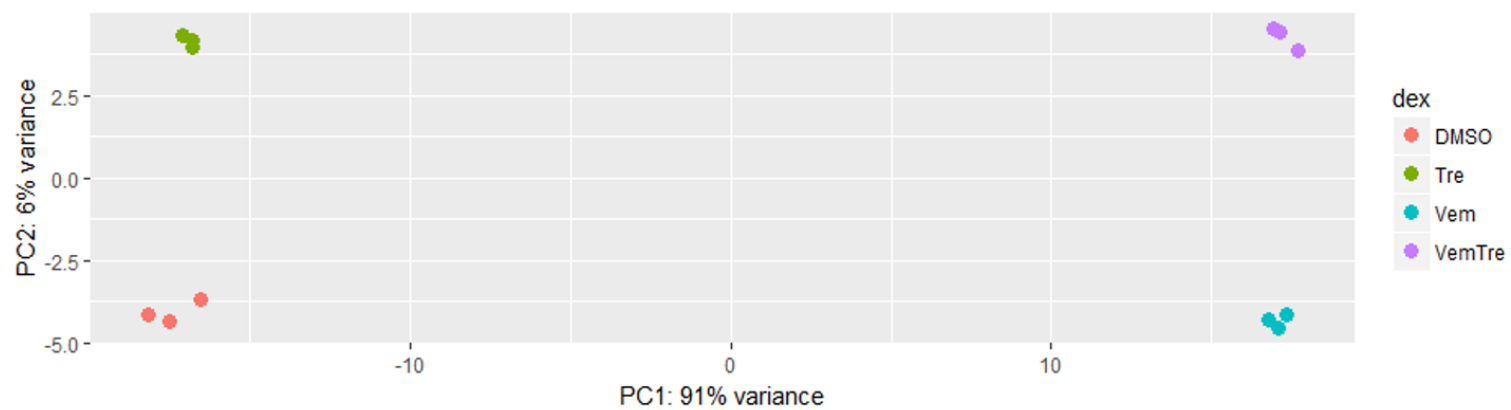

**Supplemental Figure S11. High mRNA expression of AKT1 in melanoma tumors is associated with poor patient survival in majority of studies.** A) Overall survival (left) and disease-free survival (right) shown for TCGA-SKCM melanoma patients with up-regulated AKT1 gene expression (RSEM normalized RNAseq z-score > 2.0) using data from the shown via the red line and patients without high expression in the blue line. Survival analysis for the TCGA SKCM dataset was conducted via the cBioPortal webtool. GEO gene expression datasets from melanoma tumors with corresponding survival data for melanoma patients from datasets GSE19234 (B), GSE22153 (C) and GSE53118 (D). Melanoma tumors with high (red) and low (green) expression of AKT1 were bifurcated at the median level of expression. Survival analysis for GEO datasets was conducted via the PROGgeneV2 webtool.

**A**

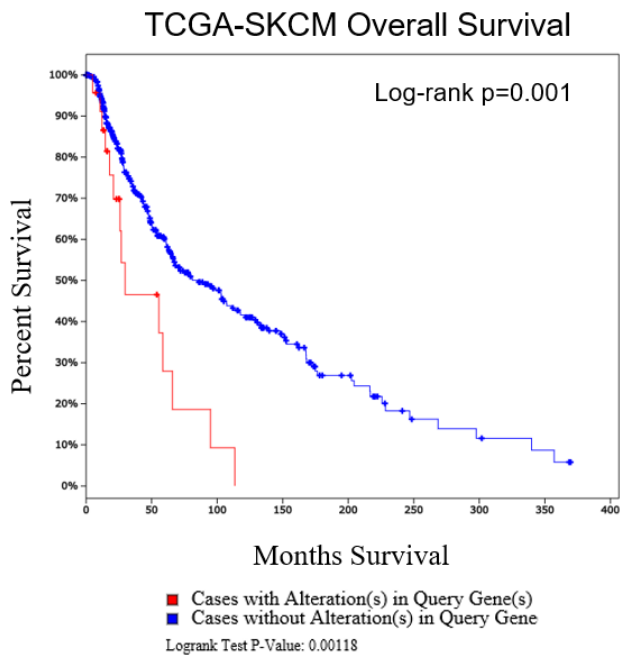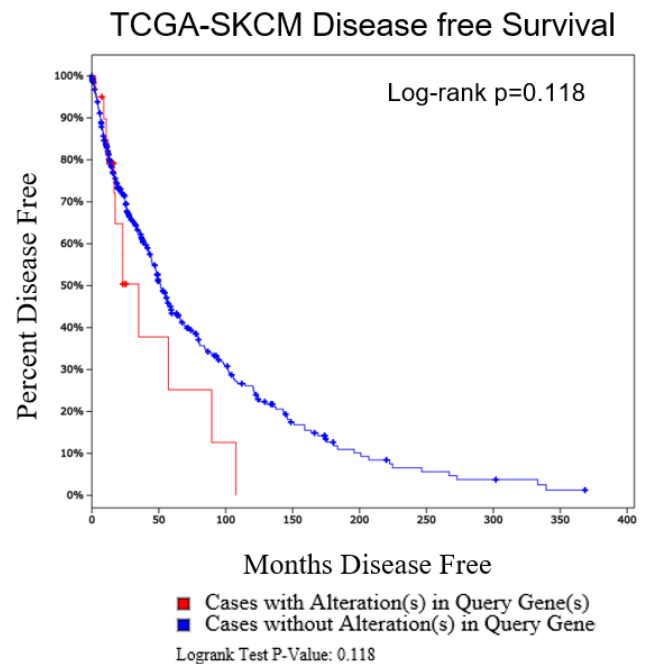

## B GSE19234 Overall Survival

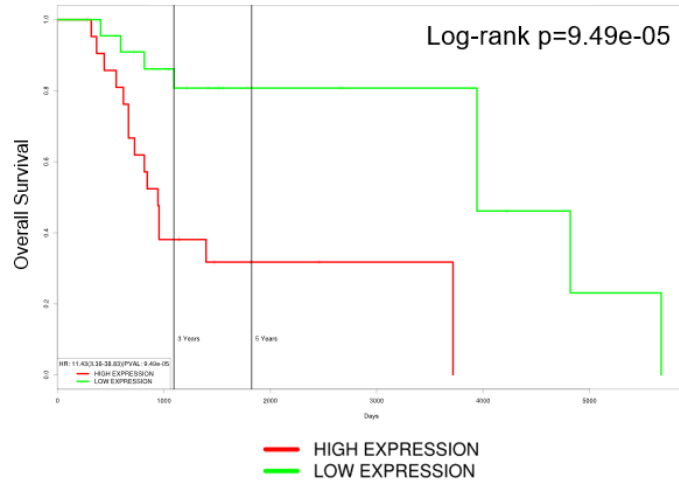

## C GSE22153 Overall Survival

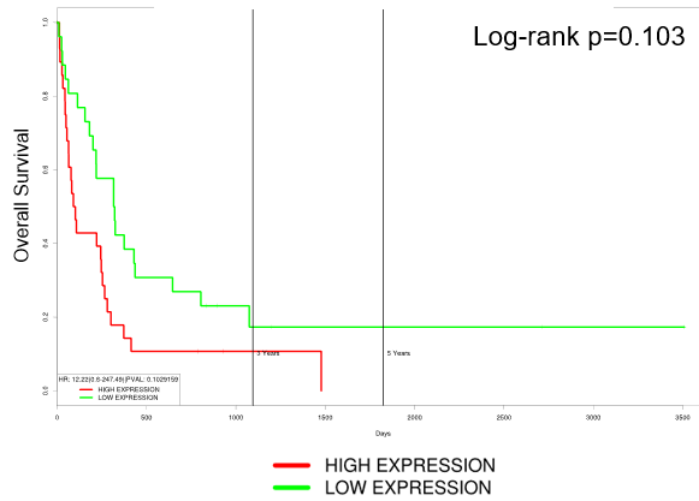

D

### GSE53118 Overall Survival

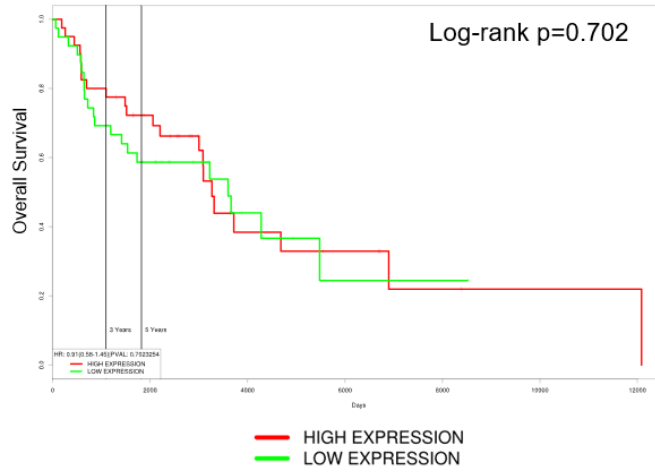

**Supplemental Figure S12. Distribution of RNA-seq gene count and log2-fold change values in drug-treated A375 melanoma cells.** Mean-difference (“MA”: minus-average) plots of are shown for each comparison between treatment of A375 cells with tretinoin (A), vemurafenib (B), vemurafenib+tretinoin combination (C) relative to DMSO vehicle control. The log2 fold change for a particular comparison is plotted on the y-axis (“M” for “minus”, where subtraction of log values is equivalent to the log of the ratio) and the average (“A” for “average”) of the counts normalized by size factor is shown on the x-axis. Individual genes are represented as dots color coded by statistical significance of differential expression (default threshold = adjusted  $P < 0.1$ ): red (significant), grey (not significant). D) Total number of mapped reads summarized as gene counts for RNA-seq data across each sample (D=DMSO, T=tretinoin, V=vemurafenib, VT=vemurafenib+tretinoin combination). Histogram plots of log2 fold changes of differential gene expression for each treatment group comparison relative to DMSO vehicle control: tretinoin (E), vemurafenib (F) and vemurafenib+tretinoin combination (G).

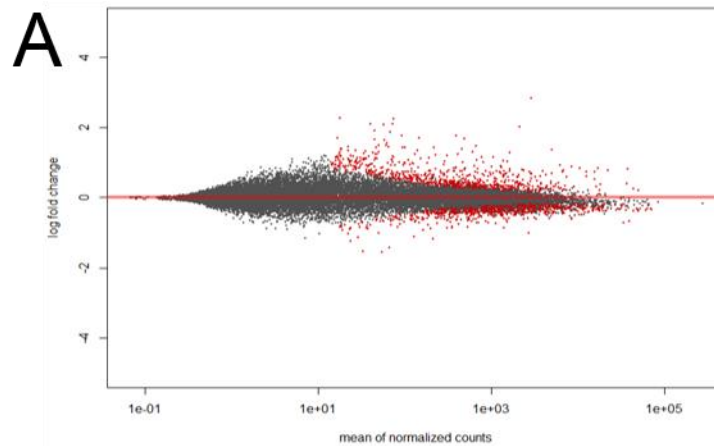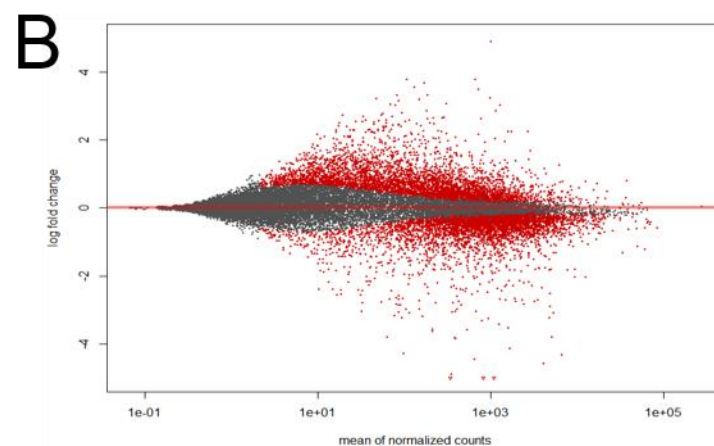

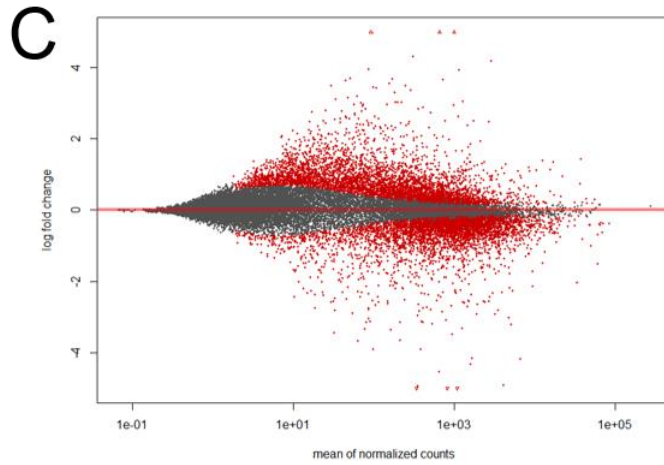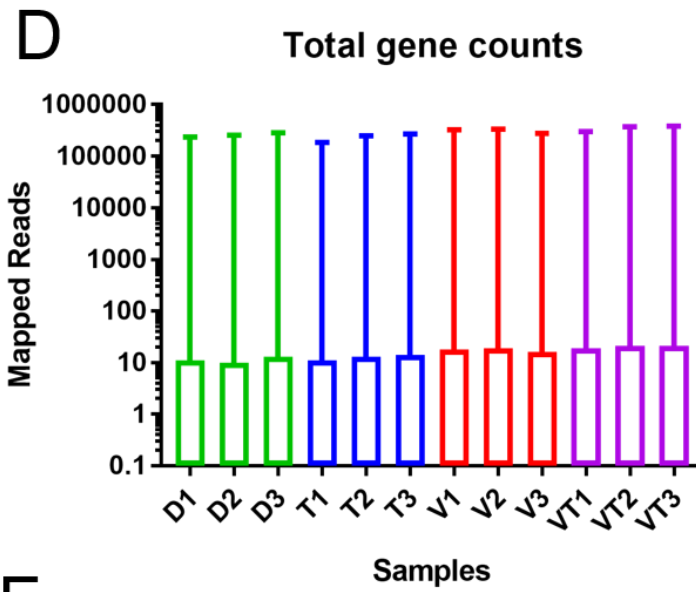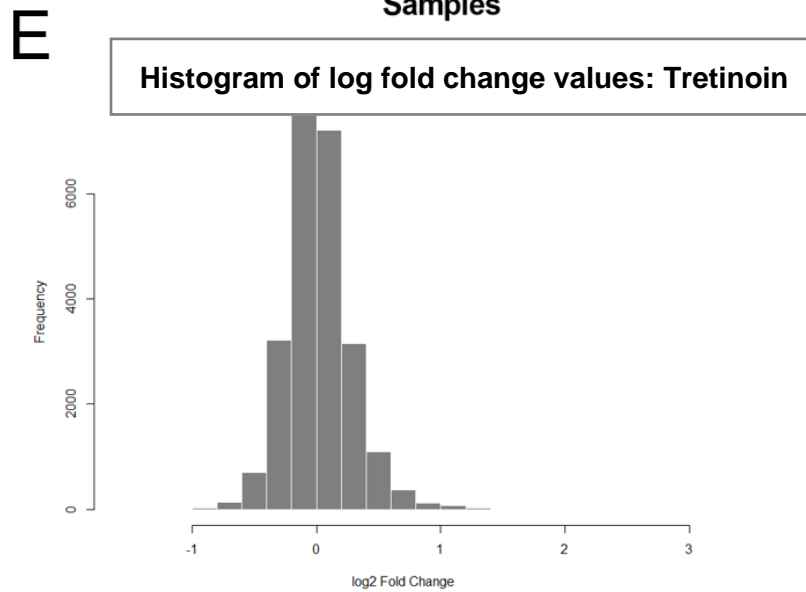

# F

**Histogram of log fold change values: Vemurafenib**

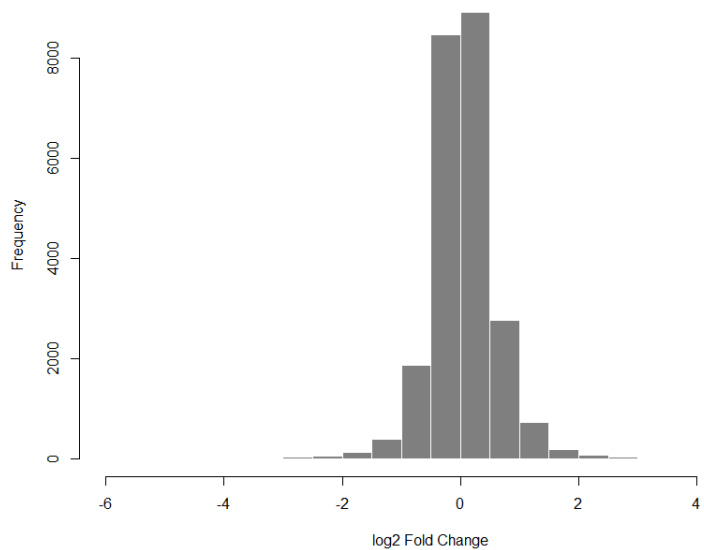

# G

**Histogram of log fold change values: Combination**

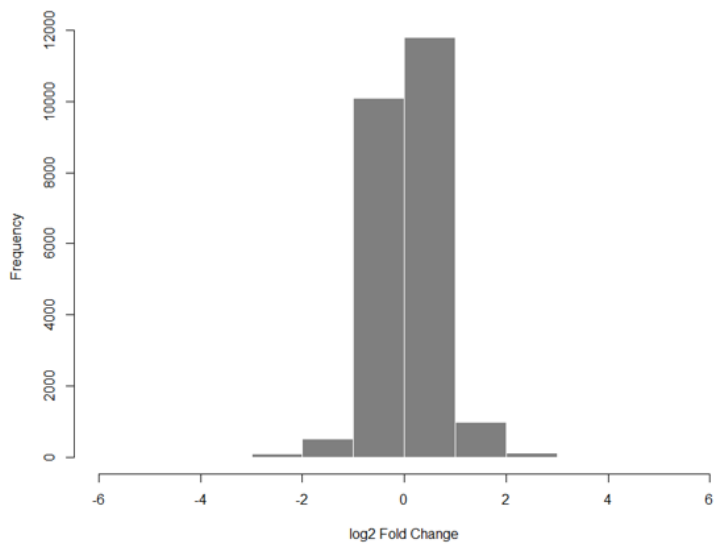

**Supplemental Figure S13. Normalized RNA-seq gene expression count plots shown for drug target genes of tretinoin and vemurafenib for A375 melanoma cells in response to each drug treatment condition.** Drug targets of tretinoin, including retinoic acid receptors (RAR) and retinoic X receptors (RXR), are shown in A-F. The drug target of vemurafenib (BRAF) is shown in G. The differential expression status of the combination treatment group relative to other treatment groups are color-coded as follows: green= DMSO vehicle control, tretinoin = blue, vemurafenib = red; where \* = adj.P<0.05, \*\* = adj.P<0.005 and \*\*\* = adj.P<0.0005.

**A**

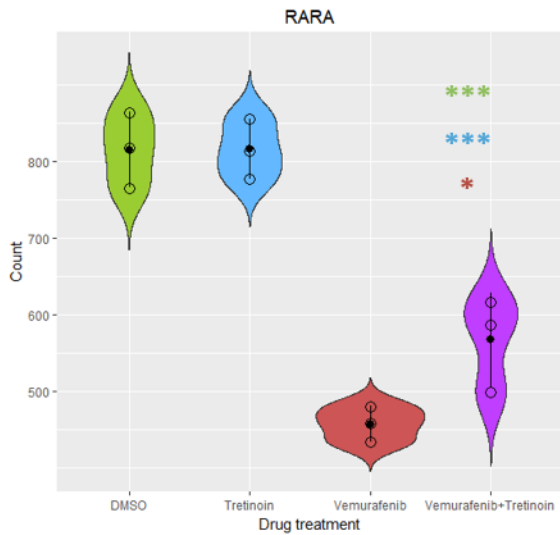

**B**

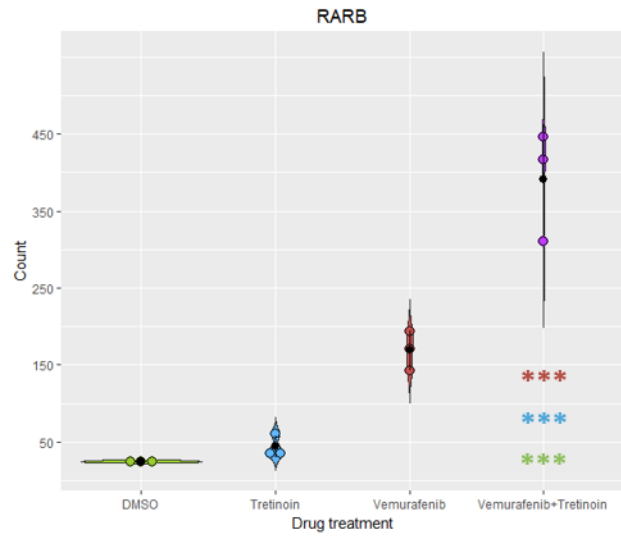

**C**

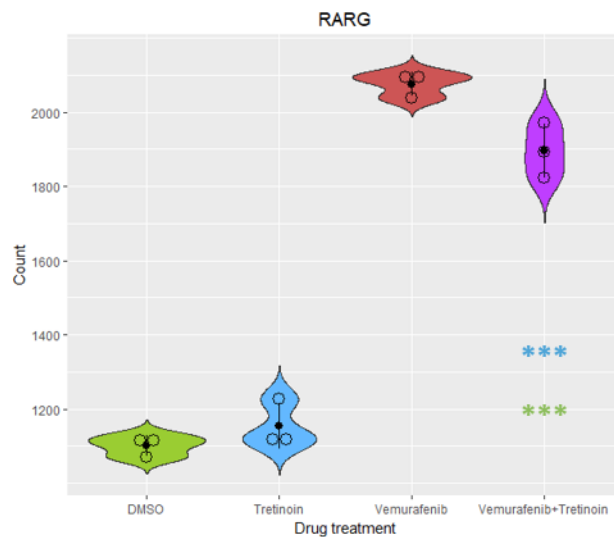



**D**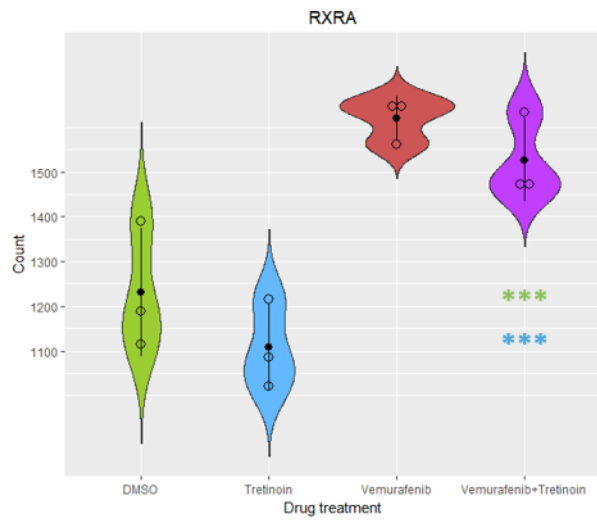**E**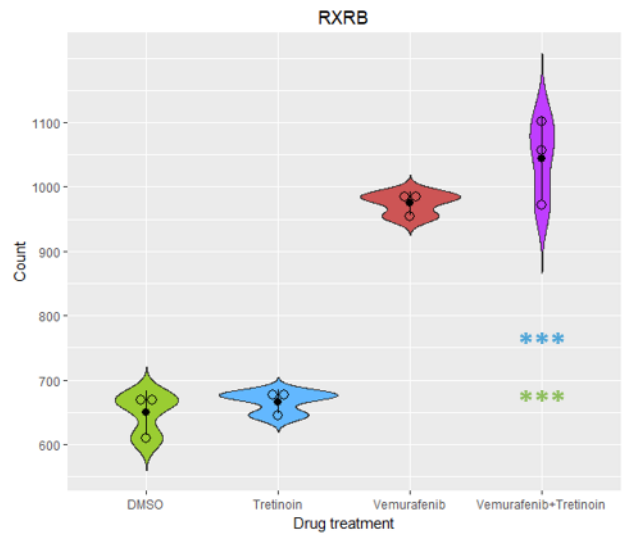**F**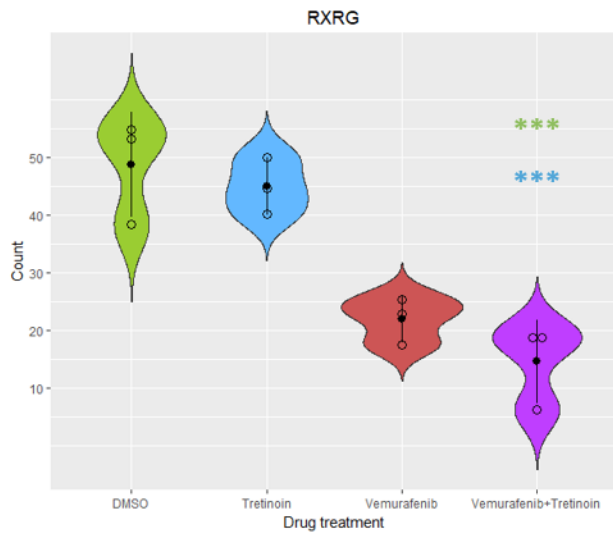**G**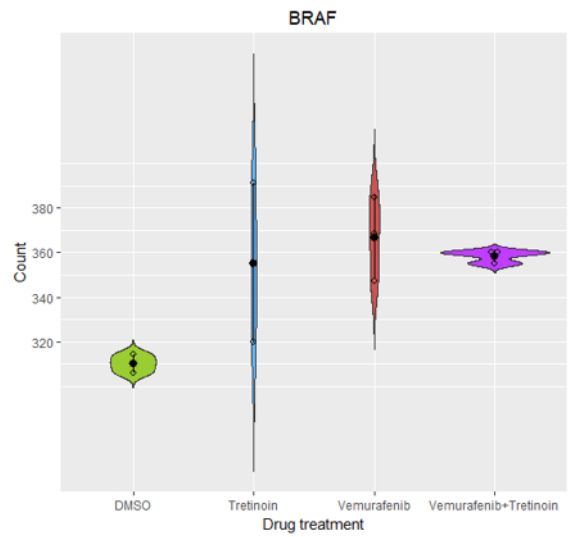

**Supplemental Figure S14. Flow cytometry gating strategy and representative scatterplots for double positive Annexin V/PI staining of A375 melanoma cells.** A) Gating strategy for untreated/unstained A375 melanoma cells applied to all experimental conditions. The average abundance of relevant cell populations within post-sort fractions is 11,136 cells (n=48 total samples). Annexin V/PI double stained A375 cells 72 hr after drug treatment with 5  $\mu$ M of: B) DMSO, C) Tretinoin, D) Vemurafenib and E) Tretinoin+Vemurafenib.

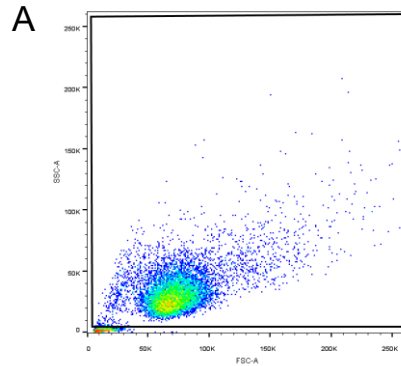

**Gating Strategy**

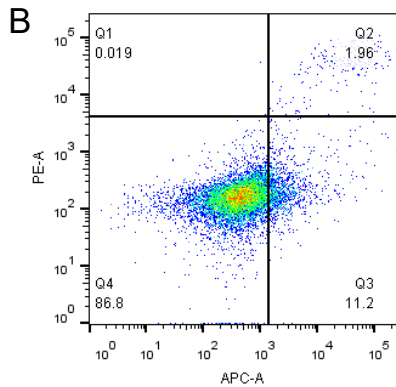

**DMSO**

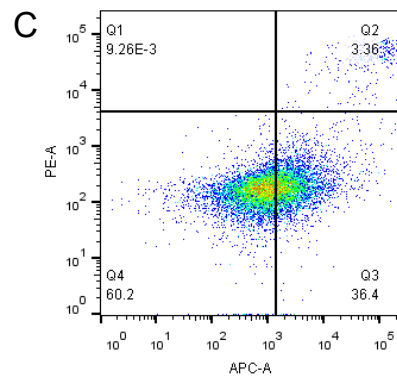

**Tretinoin**

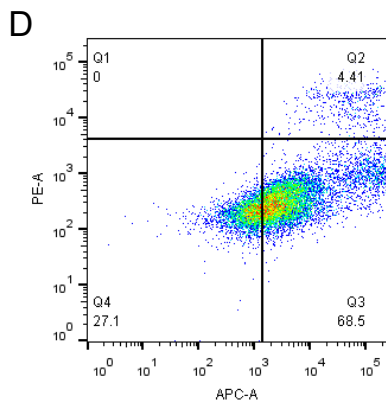

**Vemurafenib**

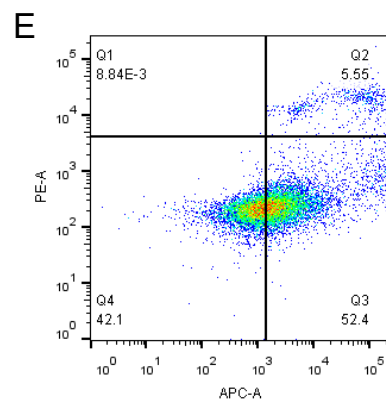

**Tretinoin +  
Vemurafenib**

## Supplemental Tables

**Supplemental Table S1. Signaling networks.** For each melanoma genomic subgroup-specific gene expression dataset (GSE15605 or TCGA-SKCM), interacting pairs of protein are shown for signaling networks generated using co-mutated genes observed in TCGA SKCM primary melanoma tumors associated with each major genomic subtype (BRAF, NRAS, NF1, triple wild-type).

| BRAF_PrimaryMelanoma_GSE15605 |         | NRAS_PrimaryMelanoma_GSE15605 |          |
|-------------------------------|---------|-------------------------------|----------|
| From                          | To      | From                          | To       |
| BRAF                          | YWHAZ   | CTNNB1                        | MDM2     |
| NEDD4L                        | SNCA    | CTNNB1                        | LEF1     |
| NEDD4L                        | NTRK1   | NEDD4L                        | SNCA     |
| CITED1                        | CTNNB1  | CITED1                        | CTNNB1   |
| APBA2                         | LRP2    | LRP2                          | LRPAP1   |
| BCL2A1                        | HRK     | BAX                           | BCL2A1   |
| CDC42                         | CSPG4   | BIRC7                         | OSTM1    |
| NTRK1                         | TRIM28  | OSTM1                         | RGS20    |
| BMPR1B                        | PEG10   | CDC7                          | CDK2     |
| AP1S2                         | ELAVL1  | CDC7                          | VAC14    |
| ELAVL1                        | OSTM1   | CITED1                        | LNX1     |
| OSTM1                         | RGS20   | CDK2                          | VIM      |
| CDC42                         | ELAVL1  | SPRY2                         | UBASH3B  |
| NTRK1                         | VAC14   | SPRY2                         | TRIM51   |
| BUB1                          | CHL1    | BAMBI                         | TGFBR1   |
| ELAVL1                        | SPRY2   | S100A1                        | S100B    |
| SPRY2                         | TRIM51  | KHDRBS3                       | LNX1     |
| BAMBI                         | SOX30   | ASB9                          | VIM      |
| BAMBI                         | BMPR1B  | HK2                           | MAGEA12  |
| S100A1                        | S100B   | LOXL4                         | PRMT6    |
| MDM2                          | TRIM27  | AP2B1                         | FN1      |
| ELAVL1                        | PHLDA1  | ITGB1                         | SPP1     |
| SPP1                          | TMEM30A | BCL2A1                        | HRK      |
| ASB9                          | UBE2D1  | ATM                           | EIF4EBP1 |
| MAD1L1                        | NTRK1   | CDK2                          | VAT1     |
| NTRK1                         | PLOD3   | IGF2BP3                       | MDM2     |
| HK2                           | MAGEA12 | GIT2                          | PXN      |
| ELAVL1                        | HRK     | ATM                           | MDM2     |
| PNMA2                         | YWHAZ   | MDM2                          | NRAS     |
| IGF2BP3                       | NTRK1   | ABL2                          | NEDD4L   |
| E2F7                          | SMURF1  | CDH2                          | CTNNB1   |
| GAPDHS                        | NUSAP1  | FN1                           | ITGB1    |
| ASB9                          | TCEB1   | FLOT1                         | FN1      |
| MAGEA6                        | TRIM28  | FN1                           | IGF2BP3  |
| MDM2                          | YWHAZ   | CXCL8                         | POMGNT1  |
| BRAF                          | NEDD4L  | ABL2                          | MDM2     |
| MLPH                          | MYO5A   | PAX3                          | POU3F2   |
| MYO5A                         | NTRK1   | PAX3                          | SOX10    |
| MDM2                          | SMURF1  | HK2                           | ITGA4    |
| HIPK2                         | MDM2    | FN1                           | PXN      |
| CXCL1                         | HIPK2   | ITCH                          | UBE2E1   |
| NTRK1                         | STXBP1  | DPYSL4                        | NUFIP1   |
| NEDD4L                        | UBE2D1  | TTR                           | VIM      |
| PAX3                          | TRIM28  | MPPED2                        | RXRG     |
| PAX3                          | SOX10   | FCGR2A                        | ITGA4    |
| HK2                           | NTRK1   | ITGB3                         | PXN      |

|          |          |          |          |
|----------|----------|----------|----------|
| MPPED2   | RXRG     | FN1      | PLAT     |
| DFNA5    | NTRK1    | ITGA2    | MMP1     |
| DPYSL4   | NTRK1    | CERS2    | FLOT1    |
| SDF4     | TTR      | ITGA4    | VIM      |
| IRF4     | PEG10    | FN1      | MIA      |
| APBA2    | STXBP1   | PKN1     | VIM      |
| NTRK1    | PKN1     | PKN1     | PLAUR    |
| BMPR1B   | SMURF1   | CBX3     | MDM2     |
| ELAVL1   | PLAUR    | CBX3     | SP100    |
| MBP      | PKN1     | ADAM10   | PXN      |
| FN1      | IGF2BP3  | LAMA1    | PLAT     |
| ELAVL1   | KRAS     | MBP      | PKN1     |
| DLGAP1   | MYO5A    | MBP      | PLP1     |
| FN1      | PLAT     | L1CAM    | NUFIP1   |
| MMP3     | NUCB1    | CDK2     | CDK5R1   |
| BCAN     | MMP1     | LNX1     | NRCAM    |
| BCAN     | MMP3     | ITGA10   | ITGB1    |
| FN1      | MIA      | UPP1     | VIM      |
| SRA1     | UBE2T    | SQSTM1   | TRIM63   |
| TRIM63   | UBE2D1   | UBASH3B  | UBE2E1   |
| MMP10    | MMP3     | CDC7     | CHL1     |
| BCAN     | MMP13    | MDM2     | TCEB1    |
| LAMA1    | PLAT     | ITCH     | MLANA    |
| MBP      | PLP1     | HMGA2    | PRMT6    |
| BACE2    | TMEM30A  | LEF1     | PRMT6    |
| CDC42    | CPN1     | NUFIP1   | SNCA     |
| NRCAM    | NTRK1    | CDK5R1   | NES      |
| UBE2D1   | UPP1     | BIRC7    | UBE2E1   |
| ELAVL1   | NEDD4L   | MDM2     | TUBB4A   |
| NEDD4L   | TBC1D7   | NEDD4L   | WNK4     |
| MYEF2    | NTRK1    | MDM2     | TRIM9    |
| MAGEC2   | SSX1     | PEG10    | TGFBR1   |
| MDM2     | TUBB4A   | ITGA4    | TUBB2B   |
| ARNT2    | TRIM27   | POU3F2   | SOX10    |
| LGALS3BP | NTRK1    | NEDD4L   | TMEM55A  |
| SDF4     | SNCA     | PRAME    | TCEB1    |
| NTRK1    | TUBB2B   | ACOT7    | CDK2     |
| POU3F2   | SOX10    | NRAS     | VAT1     |
| KIF14    | NTRK1    | INSC     | LNX1     |
| MAGEA2B  | TRIM28   | LNX1     | SLC6A15  |
| MAGEC2   | TRIM28   | CTNNB1   | HERC5    |
| ELAVL1   | NUSAP1   | ITGB1    | LGALS3BP |
| ELAVL1   | ZNF280B  | GNG2     | NUFIP1   |
| ELAVL1   | SERPINE2 | SPRY2    | SPRY4    |
| ELAVL1   | SNX10    | MPPED2   | VAC14    |
| ELAVL1   | TTYH3    | EIF2B2   | IGF2BP3  |
| ELAVL1   | TMEM30A  | CERS2    | ELOVL2   |
| ELAVL1   | NRIP3    | CA14     | EIF2B2   |
| ELAVL1   | GAS2L3   | LNX1     | POMGNT1  |
| ELAVL1   | SLC16A4  | GIT2     | QPRT     |
| PRAME    | TCEB1    | MCOLN3   | POMGNT1  |
| NTRK1    | RHOBTB3  | PRMT6    | TRIB2    |
| SMURF1   | TRIB2    | SERPINE2 | SP100    |
| SPRY2    | SPRY4    | AP1S2    | AP2B1    |
| ALX1     | SRA1     | ATM      | MAGEC2   |
| MPPED2   | VAC14    | ACOT7    | MAGEA6   |
| C1QB     | FN1      | MAGEC2   | SSX1     |

|           |           |           |          |
|-----------|-----------|-----------|----------|
| CA14      | KIF14     | LINC00518 | VAC14    |
| MDM2      | NUCB1     | ADAM10    | TSPAN10  |
| MOK       | SDF4      | FRMD5     | NRCAM    |
| KIF14     | PNKD      | COLGALT2  | TMEM255A |
| LINC00518 | VAC14     | CHSY3     | PLAUR    |
| CTNNA2    | NTRK1     | HOXD13    | PLAUR    |
| FRMD5     | NRCAM     | EIF2B2    | PNKD     |
| C1QB      | COLGALT2  | TMEM255A  | UBASH3B  |
| FOXF2     | SDF4      | CTNNA2    | CTNNB1   |
| CHSY3     | PLAUR     | CDK2      | PRKAR1A  |
| HOXD13    | PLAUR     | ARNT2     | TRAF1    |
| CHST11    | SDF4      | MEOX2     | PRKAB2   |
| GAPDHS    | SLC45A2   | RGS20     | TBC1D16  |
| KIAA1211  | NTRK1     | SETDB1    | VIM      |
| KRAS      | STK32A    | PRKAB2    | SPRY2    |
| ABCB5     | KRAS      | C2orf88   | PRKAR1A  |
| KRAS      | LOC285556 | AP2B1     | ITGA4    |
| CTNNB1    | PRKCA     | MEOX2     | SPP1     |
| ATF2      | CALU      | CDK2      | IGF2BP3  |
| BYSL      | TRIM27    | IGF2BP3   | MEOX2    |
| NTRK1     | PRKCA     | GIT2      | TRAF1    |
| TRIM27    | UBE2D1    | MDM2      | SETDB1   |
| EIF4EBP1  | PRKCA     | ITCH      | MDM2     |
| BYSL      | PNMA2     | MLPH      | RAB27A   |
| MDM2      | TCEB1     | LRIF1     | RAB27A   |
| MDM2      | UBE2D1    | MLPH      | MYO5A    |
| GLI3      | PRKCA     | FN1       | VIM      |
| CTNNB1    | SMURF1    | MEOX2     | PAX3     |
| HMGGA2    | PRKCA     | LRIF1     | ZNF24    |
| KRAS      | UBE2D1    | SETDB1    | ZNF24    |
| MBP       | PRKCA     | ASAH1     | SETDB1   |
| ELAVL1    | FN1       | SETDB1    | TTR      |
| GLI3      | KRAS      | PGBD1     | ZNF24    |
| BCAN      | FBXO11    | ITCH      | TGFBR1   |
| ATF2      | SRA1      | ITCH      | STAM     |
| ELAVL1    | FBXO11    | MEOX2     | PGBD1    |
| ELAVL1    | PRKCA     | CDK5R1    | CTNNB1   |
| CALU      | NTRK1     | STAM      | TRIM63   |
| GPRIN1    | SDF4      | ZNF24     | ZSCAN9   |
| PAX3      | POU3F2    | PRMT6     | ZSCAN9   |
| ATF2      | GLUD2     | MYEF2     | TRAF1    |
| GPRIN1    | NTRK1     | ARNT2     | MEOX2    |
| NTRK1     | TTN       | SRPK2     | ZSCAN9   |
| CTNNB1    | NTRK1     | CA14      | NUP160   |
| BYSL      | SMURF1    | MCOLN3    | SRPK2    |
| BUB1      | CDC42     | KCNN2     | SRPK2    |
| NTRK1     | VIM       | NUP160    | PNKD     |
| ASB9      | VIM       | TBC1D16   | TRAF1    |
| MDM2      | S100B     | FRMD5     | PRKAR1A  |
| NTRK1     | PTPRS     | ASAH1     | PNKD     |
| IGF2BP3   | MDM2      | ITCH      | TMEM255A |
| SMURF1    | VIM       | GSK3B     | SNCA     |
| ELAVL1    | HK2       | NPM1      | PRKAR1A  |
| TTR       | VIM       | GSK3B     | VIM      |
| PKN1      | PLAUR     | CDK2      | NPM1     |
| MMP3      | PTPRS     | DNAJC13   | GSK3B    |
| TRIM63    | TTN       | MDM2      | NPM1     |

|        |         |          |          |
|--------|---------|----------|----------|
| UPP1   | VIM     | AURKA    | NPM1     |
| ELAVL1 | NTRK1   | FN1      | NPM1     |
| CTNNB1 | ELAVL1  | CDK6     | SOX10    |
| ELAVL1 | IGF2BP3 | CDK2     | CDK6     |
| PKM    | TRIM63  | AP2B1    | TGFBR1   |
| BCAN   | MMP10   | FN1      | ITGA4    |
| NTRK1  | PKM     | DNAJC13  | NPM1     |
| ELAVL1 | ZBTB20  | CDK5R1   | CDK6     |
| CDK2   | NTRK1   | HMGA2    | NPM1     |
| BYSL   | RNF2    | DNAJC13  | OGN      |
| ADNP   | NTRK1   | ARPC1B   | AURKA    |
| PEG10  | RNF2    | ARPC1B   | SRPK2    |
| BYSL   | TRIP6   | ICAM1    | NPM1     |
| CDC6   | CHL1    | CNPY3    | COLGALT2 |
| CDC6   | CDK2    | COLEC11  | COLGALT2 |
| GAPDH5 | TRIP6   | CNPY3    | OGN      |
| PNMA1  | PNMA6A  | BAX      | MDM2     |
| ADNP   | RNF2    | FN1      | SNRPD1   |
| ARNT2  | TRIP6   | CTSB     | SPRY2    |
| ADNP   | ZSCAN20 | IFIT3    | SNRPD1   |
| GLUD2  | RNF2    | PARP1    | SPP1     |
| ADNP   | QPRT    | CCT6A    | CDK2     |
|        |         | CCT6A    | MDM2     |
|        |         | MDM2     | PARP1    |
|        |         | CTSB     | PARP1    |
|        |         | CCT6A    | FN1      |
|        |         | IRF4     | PEG10    |
|        |         | HOXB7    | PARP1    |
|        |         | CCT6A    | LGALS3BP |
|        |         | CCT6A    | TUBB2B   |
|        |         | SNRPD1   | SRPK2    |
|        |         | ICAM1    | SNRPD1   |
|        |         | BAX      | SNCA     |
|        |         | CTNND2   | LNK1     |
|        |         | LNK1     | TRIM23   |
|        |         | EIF4EBP1 | PRKCA    |
|        |         | MDM2     | TRIM23   |
|        |         | ITGB1    | PRKCA    |
|        |         | LNK1     | PRKCA    |
|        |         | TRIM23   | UBE2E1   |
|        |         | CTNND2   | TTR      |
|        |         | AKAP12   | PRKCA    |
|        |         | ITGA2    | ITGB1    |
|        |         | MBP      | SQSTM1   |
|        |         | ASB9     | TCEB1    |
|        |         | HMGA2    | PRKCA    |
|        |         | ARNT2    | TRIM23   |
|        |         | MPPED2   | TRIP13   |
|        |         | CTNNB1   | SMAD2    |
|        |         | LEF1     | SMAD2    |
|        |         | APBA2    | LRP2     |
|        |         | PIN1     | TRAF1    |
|        |         | HEXIM2   | SPRY2    |
|        |         | PIN1     | SMAD2    |
|        |         | CDK2     | SMAD2    |
|        |         | CDK2     | LYN      |
|        |         | ITCH     | SMAD2    |

|          |         |
|----------|---------|
| DYRK3    | NEDD4L  |
| NUFIP1   | STXBP1  |
| NEDD4L   | SMAD2   |
| APBA2    | STXBP1  |
| SMAD2    | TGFBR1  |
| ITGA4    | PIN1    |
| PKN1     | TRAF1   |
| LYN      | PLAUR   |
| COL11A2  | PIN1    |
| HEXIM2   | PIN1    |
| LNX1     | TRIP13  |
| LNX1     | SAT1    |
| HOXB6    | SAT1    |
| SAT1     | SETDB1  |
| HOXB6    | PLSCR1  |
| PLSCR1   | SPRY2   |
| PHLDA1   | PLSCR1  |
| LOXL4    | TRIP13  |
| CDK4     | SETDB1  |
| EIF4EBP1 | LRPAP1  |
| DPYSL4   | TRIP13  |
| EVA1A    | SAT1    |
| PLEKHA4  | SETDB1  |
| CDK4     | CDK6    |
| CBX3     | FN1     |
| BIRC7    | HTRA2   |
| ARNT2    | PLSCR1  |
| PIN1     | SNCA    |
| C19orf66 | TRAF1   |
| LNX1     | MTUS2   |
| C19orf66 | SPRY2   |
| MTUS2    | SLC23A1 |
| PNMA2    | SDCBP   |
| CTNNB1   | PARP1   |
| ITGA4    | SDCBP   |
| MTUS2    | SDCBP   |
| CDK5R1   | MTUS2   |
| SNCA     | SQSTM1  |
| ARNT2    | MTUS2   |
| C19orf66 | MTUS2   |
| MITF     | TFEC    |
| LEF1     | MITF    |
| PDE4D    | TRAF1   |
| PRKACB   | SPP1    |
| CDK2     | MITF    |
| CDK2     | TSC22D1 |
| ATM      | EIF3E   |
| RGS1     | TSC22D1 |
| CCT6A    | ITGA4   |
| CDK2     | EIF3E   |
| EIF3E    | TRIM63  |
| CCT6A    | UBASH3B |
| CDK2     | PDE4D   |
| PRKACB   | PRKAR1A |
| EIF3E    | ICAM1   |
| MAGEA6   | PDE4D   |
| CDK2     | FASN    |

|         |         |
|---------|---------|
| FASN    | MDM2    |
| FASN    | FN1     |
| ITGA4   | SNRPD1  |
| IGF2BP3 | SYK     |
| ITGB3   | SYK     |
| ITGA4   | SYK     |
| PRKD1   | SYK     |
| SYK     | UBASH3B |

| NF1_PrimaryMelanoma_GSE15605 |         | TWT_PrimaryMelanoma_GSE15605 |         |
|------------------------------|---------|------------------------------|---------|
| From                         | To      | From                         | To      |
| BAX                          | BCL2A1  | BAX                          | SNCA    |
| ANKRD28                      | PPP1R9B | BAX                          | MDM2    |
| CDKN2A                       | PPP1R9B | BAX                          | BCL2A1  |
| S100A1                       | S100B   | S100A1                       | S100B   |
| CDKN2A                       | MDM2    | MDM2                         | TRIM27  |
| MDM2                         | UBE2D1  | MDM2                         | UBE2D1  |
| TRIM63                       | UBE2D1  | TRIM63                       | UBE2D1  |
| MDM2                         | TCEB1   | MDM2                         | TCEB1   |
| MDM2                         | MS4A1   | MDM2                         | MS4A1   |
| ACACB                        | ANKRD28 | IL12RB1                      | TUBB4A  |
| MDM2                         | TUBB4A  | IL12RB1                      | IL12RB2 |
| PRAME                        | TCEB1   | MDM2                         | TUBB4A  |
| BAX                          | MDM2    | PRAME                        | TCEB1   |
| MDM2                         | S100A1  | MDM2                         | S100B   |
| RNF114                       | UBE2D1  | MDM2                         | PPT1    |
| IL12RB1                      | TUBB4A  | CCL5                         | CCR1    |
| IL12RB1                      | IL12RB2 | CCL5                         | CXCL8   |
| BRCA2                        | PCNA    | CCR1                         | GNAQ    |
| MDM2                         | PCNA    | GNAQ                         | PPT1    |
| CDK2                         | CDK5R1  |                              |         |
| CDK2                         | LMNA    |                              |         |
| LMNA                         | MDM2    |                              |         |
| IFIT3                        | ISG15   |                              |         |
| ISG15                        | LMNA    |                              |         |
| BUB1                         | MAD2L1  |                              |         |
| BUB1                         | SMC2    |                              |         |
| MDM2                         | PLK1    |                              |         |
| MAD2L1                       | UBD     |                              |         |
| CXCL9                        | CXCR3   |                              |         |
| CXCL10                       | CXCR3   |                              |         |
| CXCL9                        | SYNE4   |                              |         |
| CXCL11                       | CXCR3   |                              |         |
| CXCL13                       | CXCR3   |                              |         |
| GZMB                         | LMNA    |                              |         |
| SMC2                         | SYNE4   |                              |         |
| ISG15                        | PLOD3   |                              |         |
| PIN1                         | SNCA    |                              |         |
| BCL2A1                       | NR4A1   |                              |         |
| ISG15                        | TOP2A   |                              |         |
| NR4A1                        | TOP2A   |                              |         |
| NEDD4L                       | UBE2D1  |                              |         |
| CNKSR1                       | PIN1    |                              |         |
| PIN1                         | TOP2A   |                              |         |
| NEDD4L                       | SNCA    |                              |         |
| TCEB1                        | TOP2A   |                              |         |
| NR4A1                        | TUBB4A  |                              |         |
| CTNND2                       | LNK1    |                              |         |



|         |           |
|---------|-----------|
| MDM2    | UBE2D2    |
| LNX1    | UBE2D2    |
| TRIM63  | UBE2D2    |
| LNX1    | SLC6A15   |
| CDK2    | LYN       |
| MDM2    | S100B     |
| DENND2C | LYN       |
| LYN     | TUBB4A    |
| LNP1    | LYN       |
| KLC1    | SNCA      |
| KLC1    | USP7      |
| MDM2    | USP7      |
| KLC1    | SYNE4     |
| TRIM63  | USP7      |
| ENTPD3  | SYNE4     |
| HERC5   | ISG15     |
| DDX39A  | MDM2      |
| DDX39A  | FAT3      |
| HELZ2   | ISG15     |
| CDK2    | EIF3E     |
| ANP32A  | ATXN1     |
| ANP32A  | VPS72     |
| CLP1    | VPS72     |
| IFIT1   | IFIT3     |
| SPP1    | VPS72     |
| ANP32A  | EIF3E     |
| ATXN1   | PSPH      |
| ATXN1   | NR4A1     |
| CLP1    | HMCN1     |
| EIF3E   | TRIM63    |
| ASB9    | TCEB1     |
| MBP     | PLP1      |
| ATXN1   | KIAA1549L |
| ASB9    | H2AFZ     |
| H2AFZ   | VPS72     |
| ATXN1   | BATF2     |
| AP2B1   | FN1       |
| FN1     | IGF2R     |
| FN1     | MIA       |
| IGF2R   | PLAUR     |
| EXT1    | SYNE4     |
| C1QB    | FN1       |
| AP2B1   | NUSAP1    |
| GAPDHS  | NUSAP1    |
| EXT1    | PLAUR     |
| GAPDHS  | SLC45A2   |
| BAX     | SNCA      |
| PPL     | USP7      |
| KAZN    | PPL       |
| ARRB2   | SRPK2     |
| ARRB2   | MDM2      |
| SRPK2   | UBD       |
| MCOLN3  | SRPK2     |
| KCNQ5   | MCOLN3    |
| KCNN2   | SRPK2     |
| GRB2    | VIM       |
| AP2B1   | GRB2      |

|          |           |
|----------|-----------|
| ISG15    | VIM       |
| GRB2     | KRT83     |
| ATXN1    | MBP       |
| GRB2     | KIAA1549L |
| ASB9     | VIM       |
| LRP2     | MAG1      |
| EGFR     | MEGF6     |
| EGFR     | SNCA      |
| ISG15    | STAT1     |
| EGFR     | SMC2      |
| EGFR     | SOCS3     |
| EGFR     | STAT1     |
| SOCS3    | TCEB1     |
| IL12RB2  | SOCS3     |
| EGFR     | TUBB4A    |
| MYBPC1   | TRIM63    |
| CDK2     | USP7      |
| LMNA     | USP7      |
| MYO3A    | USP7      |
| ISG15    | PALLD     |
| GMEB1    | TRIM63    |
| ISG15    | MX1       |
| ACACA    | MDM2      |
| ACACA    | KIF5B     |
| ACACA    | PRKAA2    |
| KIF5B    | SYNE4     |
| LCK      | PTPRC     |
| CD8A     | PTPRC     |
| LCK      | MS4A1     |
| GRB2     | ROS1      |
| MDM2     | SRC       |
| SOCS1    | TCEB1     |
| MDM2     | RRBP1     |
| SAMD9    | SHMT2     |
| MDM2     | SHMT2     |
| LYN      | SLITRK4   |
| LMNA     | SYNE1     |
| DTNBP1   | KIF5B     |
| DTNBP1   | SYNE1     |
| SSX2IP   | TRIM37    |
| TRIM37   | UBE2D1    |
| SSX2IP   | SYT17     |
| HLA-A    | UGGT1     |
| MDM2     | TRAF5     |
| CD8A     | HLA-A     |
| TNFRSF14 | TRAF5     |
| HLA-A    | ITM2B     |
| ITM2B    | SYNE4     |
| SNRPD1   | USP7      |
| IFIT3    | SNRPD1    |
| ICAM1    | YBX2      |
| ICAM1    | SNRPD1    |

| BRAF_PrimaryMelanoma_TCGASKCM |        | NRAS_PrimaryMelanoma_TCGASKCM |     |
|-------------------------------|--------|-------------------------------|-----|
| From                          | To     | From                          | To  |
| ARF3                          | ELAVL1 | CAPN1                         | VIM |

|           |          |          |          |
|-----------|----------|----------|----------|
| CTNNB1    | MSN      | CTNNB1   | MDM2     |
| PGK1      | YWHAZ    | SNCA     | SQSTM1   |
| CDK2      | MYC      | NPM1     | PRKAR1A  |
| FN1       | SMAD4    | FN1      | SMAD4    |
| FTL       | SDCBP    | ITGA3    | ITGB1    |
| SDCBP     | TSPAN3   | KRT15    | KRT6B    |
| BRAF      | YWHAQ    | CCT6A    | VIM      |
| ABCE1     | LMNA     | MDM2     | PTK2     |
| ELAVL1    | MITF     | S100A1   | S100B    |
| PDIA3     | PLXNA1   | JUP      | MDM2     |
| AKT1      | CTNNB1   | NONO     | SFN      |
| CTTN      | STAT1    | KRT10    | SFN      |
| NPM1      | PRKAR1A  | CDK2     | GRN      |
| SHC1      | STXBP1   | PARP1    | TRIM29   |
| CDH1      | JUP      | FTH1     | SDCBP    |
| NONO      | SFN      | FTL      | SDCBP    |
| AHCY      | PXN      | MDM2     | TPM3     |
| BCAR1     | YWHAZ    | PHC2     | SDCBP    |
| HNRNPA2B1 | SERPINH1 | S100A2   | S100B    |
| CAPNS1    | CSPG4    | ITGB1    | SPP1     |
| STMN1     | TRIM28   | CD63     | SDC1     |
| HNRNPA2B1 | HNRNPAB  | CAP1     | PXN      |
| MCL1      | MYC      | SHC1     | STXBP1   |
| CCT5      | CCT7     | ERBB3    | SHC1     |
| ITCH      | SFN      | TNFRSF14 | VIM      |
| GGA2      | IGF2R    | CDK2     | PUF60    |
| CDK2      | SORT1    | CDK2     | VAT1     |
| ABCE1     | VIM      | EIF4A2   | TPM3     |
| COP56     | SAT1     | CDK2     | TSC22D1  |
| BRAF      | SFN      | CDK2     | CTSA     |
| CUL1      | KRT6B    | MMP14    | TIMP2    |
| LASP1     | MAP4     | CDK2     | SORT1    |
| S100A1    | S100B    | FN1      | GSN      |
| AP2B1     | GRB2     | MDM2     | NRAS     |
| ELAVL1    | PHLDA1   | ANKS1A   | SFN      |
| JUP       | MSN      | LAD1     | SFN      |
| PTBP1     | SLC3A2   | ITGB1    | LGALS3BP |
| ILF3      | IVNS1ABP | FLOT1    | FN1      |
| PARP1     | SPP1     | CTNNB1   | PARP1    |
| SQSTM1    | STXBP1   | ATP1A1   | TPM3     |
| MED15     | UBAP2L   | PGK1     | SFN      |
| GRN       | RAC1     | LGALS3BP | TUBA1A   |
| HSPD1     | PLOD3    | CTSB     | PARP1    |
| KRT6A     | SHC1     | CSTB     | CTSB     |
| KRT17     | PA2G4    | LRPAP1   | SORT1    |
| GRB2      | SIRPA    | DSP      | PKP1     |
| ANXA5     | TERF2IP  | DSP      | KRT1     |
| FTH1      | SDCBP    | CDK6     | SOX10    |
| ELAVL1    | ITPKB    | MORF4L1  | TUBA1A   |
| STMN1     | TPM3     | MDM2     | RAB7A    |
| PHC2      | SDCBP    | ANXA5    | NDRG1    |
| CANX      | RPN2     | PRKCSH   | TUBA1A   |
| ECM1      | MCL1     | ASAH1    | TSC22D1  |
| ABCE1     | TPP1     | ICAM1    | RPL35A   |
| PGK1      | TP1      | PTK2     | STAT1    |
| CCT6A     | CCT7     | KPNB1    | MDM2     |
| MYC       | YWHAQ    | CDK2     | CDK6     |

|          |          |          |          |
|----------|----------|----------|----------|
| IVNS1ABP | PARP1    | FBXO7    | PSMB4    |
| GRB2     | SHC1     | FN1      | PLAT     |
| ERBB3    | PA2G4    | DAG1     | TUBA1A   |
| ABCE1    | CBX3     | GRN      | SLPI     |
| BRAF     | HSP90AB1 | FASN     | NPM1     |
| BCAR1    | MMP14    | PKN1     | VIM      |
| TNFRSF14 | VIM      | CD63     | SDCBP    |
| PUF60    | SRRM2    | KRT1     | SFN      |
| FDFT1    | FN1      | IVL      | KRT1     |
| COPS6    | CUL1     | FN1      | IGF2R    |
| ARHGDIS  | PDIA3    | SP100    | TRIM29   |
| MAP3K11  | RAC1     | KRT1     | KRT5     |
| TSC22D1  | VIM      | CCT6A    | FASN     |
| DYNC1H1  | YBX1     | PUF60    | SDCBP    |
| SGK1     | YWHAQ    | MBP      | PKN1     |
| ICAM1    | SNRPB    | MBP      | PLP1     |
| CALML5   | MAGED1   | AHNAK    | MDM2     |
| GANAB    | TNS3     | SDC3     | TUBA1A   |
| FN1      | GSN      | KRT14    | KRT5     |
| CDK2     | CTSA     | NPM1     | SQSTM1   |
| MMP14    | TIMP2    | ITGB1    | TGOLN2   |
| AHNAK    | VARS     | KRT17    | MDM2     |
| MAGED1   | MAGED2   | EIF3E    | NPM1     |
| FN1      | MYH10    | CDK6     | FBXO7    |
| CALM3    | GRB2     | FN1      | SRM      |
| GNAS     | GNB1     | H2AFZ    | MORF4L1  |
| NPM1     | PA2G4    | CALU     | NPM1     |
| DDOST    | HSP90AB1 | CALU     | WARS     |
| NCL      | PA2G4    | GALNT2   | TGOLN2   |
| CANX     | PDIA6    | SLC39A6  | SPP1     |
| KPNB1    | NCL      | LDHB     | PGK1     |
| LDHB     | MIF      | CDK2     | COPA     |
| CTNNA1   | JUP      | APOD     | CDK2     |
| HMG20B   | VIM      | NAP1L1   | NPM1     |
| CLIC4    | EZR      | LDHB     | WDR1     |
| MSN      | WDR1     | CDK2     | MARCKSL1 |
| ELAVL1   | TFAP2A   | NRAS     | VAT1     |
| MYC      | PRKDC    | ARPC1B   | CALU     |
| PRKDC    | XRCC5    | ATP6V1B2 | JUP      |
| ANKS1A   | SFN      | PSAP     | SNCA     |
| HNRNPU   | MAGED2   | MDM2     | RRBP1    |
| KRT1     | SFN      | CAP1     | MYL12A   |
| CD81     | NAMPT    | IFI16    | MDM2     |
| FN1      | RCC2     | ERBB3    | TNS3     |
| AKT1     | YBX1     | CD59     | SMAD4    |
| ATP1A1   | PHB      | GPNMB    | SMAD4    |
| MLPH     | RAB27A   | EIF3E    | ICAM1    |
| MLPH     | MYO5A    | CRTAP    | SP100    |
| PGK1     | YWHAQ    | CAPN1    | GNS      |
| KRT10    | SFN      | SERPINE2 | SP100    |
| DDOST    | PHB      | KRT15    | PKN1     |
| ELAVL1   | TXNIP    | SETDB1   | VIM      |
| HSP90AB1 | TUBB     | MDM2     | SFN      |
| MAP4     | SERBP1   | GRN      | NPM1     |
| CTSB     | PARP1    | PARP1    | SPP1     |
| ABCE1    | CSTB     | SDC1     | SDCBP    |
| CST3     | CSTB     | CAP1     | FASN     |

|          |          |         |          |
|----------|----------|---------|----------|
| CANX     | DDOST    | CLIC4   | SHC1     |
| ABCE1    | IGF2R    | ERBB3   | MDM2     |
| LRPAP1   | SORT1    | PUF60   | VIM      |
| KPNB1    | SREBF2   | CDK2    | VIM      |
| ATP2A2   | S100A1   | FECH    | TIMP2    |
| PEA15    | TERF2IP  | MDM2    | SETDB1   |
| CDK2     | S100A6   | FN1     | ITGB1    |
| DSP      | KRT1     | MDM2    | PARP1    |
| LDHB     | PPIA     | FN1     | VIM      |
| PAX3     | TRIM28   | PAX3    | SOX10    |
| PAX3     | SOX10    | KPNB1   | MORF4L1  |
| CHD4     | ELAVL1   | CLIC4   | NDRG1    |
| ANXA5    | TUBB     | SETDB1  | ZNF24    |
| GPAA1    | PIGT     | ASAH1   | SETDB1   |
| FN1      | RAB7A    | PGBD1   | ZNF24    |
| AKT1     | CD81     | CLIC4   | PSMB4    |
| CSDE1    | JUP      | CLIC4   | DAG1     |
| COPS6    | SFN      | MDM2    | NPM1     |
| EZR      | L1CAM    | PKN1    | PLAUR    |
| COPS6    | PSAP     | CBX3    | SP100    |
| MYC      | MYO9B    | MBP     | SQSTM1   |
| SERBP1   | SFN      | RAD23B  | VIM      |
| LAMC1    | PDIA3    | CDK2    | CLIC4    |
| APOD     | SUMF2    | PLAUR   | PSAP     |
| MYC      | USP22    | ICAM1   | IFI16    |
| FKBP9    | HEXA     | FECH    | MDM2     |
| ASAH1    | TSC22D1  | PLAUR   | PLTP     |
| ATP6AP1  | HNRNPAB  | CAPN1   | FN1      |
| ECH1     | GSTO1    | CDK2    | CTNNB1   |
| MYL6     | STMN1    | CTNNB1  | SMAD4    |
| COPS6    | PAEP     | FASN    | TPM3     |
| ABCE1    | RPL35A   | NDRG1   | S100B    |
| FN1      | GSTO1    | FASN    | SHC1     |
| GAPDH    | TP11     | FN1     | PUF60    |
| CAPNS1   | YWHAZ    | CDK2    | NPM1     |
| ECH1     | TIMP1    | NPM1    | PARP1    |
| HNRNPU   | SLC7A5   | CTNNB1  | TUBA1A   |
| CD63     | TSPAN3   | FN1     | NPM1     |
| CDK2     | COPA     | FN1     | RAB7A    |
| MBP      | SQSTM1   | FN1     | KPNB1    |
| FN1      | HSP90AB1 | DNAJC13 | NPM1     |
| ABCE1    | CD44     | FN1     | KRT5     |
| KRT1     | KRT5     | AHNAK   | FN1      |
| CLIC4    | PSMB4    | KRT17   | SHC1     |
| COX4I1   | GNB1     | DNAJC13 | OGN      |
| CLIC4    | DAG1     | ITGB1   | PTK2     |
| ANXA5    | PDIA3    | CCT6A   | SHC1     |
| FN1      | PLAT     | CCT6A   | CDK2     |
| IGFBP5   | SPP1     | CCT6A   | MDM2     |
| PTTG1IP  | STX7     | FASN    | FN1      |
| FN1      | MIA      | CDK2    | KPNB1    |
| HNRNPU   | SND1     | CD63    | ITGB1    |
| HSP90AB1 | HSPD1    | KRT5    | SHC1     |
| ICAM1    | TUBB     | CCT6A   | LGALS3BP |
| FN1      | TNC      | SQSTM1  | STXBP1   |
| ATP1A1   | EIF3B    | TTR     | VIM      |
| HMGA1    | NPM1     | AHNAK   | S100B    |

|          |           |          |         |
|----------|-----------|----------|---------|
| GLG1     | ITM2B     | FN1      | PARP1   |
| ARF4     | LDHB      | PAX3     | RAD23B  |
| TLN1     | YWHAQ     | CTSA     | PLAUR   |
| AGRN     | PDIA3     | CBX3     | FN1     |
| CAPNS1   | PDIA4     | PUF60    | RAD23B  |
| COL6A1   | PDIA3     | CTNNB1   | SMAD2   |
| ACTR2    | FN1       | PRKAR1A  | SMAD2   |
| CCT6A    | FASN      | KRT6B    | UCHL5   |
| SERPINH1 | STX7      | CTNNB1   | NONO    |
| MBP      | PLP1      | NEDD4L   | SFN     |
| ELAVL1   | ETV5      | FTL      | UCHL5   |
| CD81     | TUBA1B    | FN1      | TPM3    |
| BACE2    | GGA2      | CAP1     | FN1     |
| FBXO7    | PSMB4     | DYRK3    | NEDD4L  |
| SDC3     | TUBB      | CDSN     | UCHL5   |
| HNRNPU   | KRT14     | KRT10    | KRT5    |
| LYST     | YWHAZ     | CCT6A    | FN1     |
| CALM3    | MYO10     | PKP1     | UCHL5   |
| SF3B2    | TMED9     | NEDD4L   | SMAD2   |
| ELAVL1   | HNRNPA2B1 | CTNNB1   | NDRG1   |
| GNAS     | MAGED2    | KPNB1    | SMAD2   |
| CAPRIN1  | CDK2      | PSMB4    | UCHL5   |
| FN1      | UBAP2L    | PKN1     | TUBA1A  |
| AHCY     | LDHB      | IVL      | UCHL5   |
| NUCB1    | WARS      | CBX3     | MDM2    |
| CDK2     | GLG1      | CCT6A    | SMAD2   |
| EZR      | H2AFZ     | RAD23B   | UCHL5   |
| ITCH     | MLANA     | SMAD2    | UCHL5   |
| YWHAQ    | ZC3H13    | PSAP     | SMAD2   |
| PDIA3    | PLOD1     | ICAM1    | NPM1    |
| LAMP2    | TUBB      | CDK4     | SNCA    |
| LDHB     | PPT1      | CDK4     | SETDB1  |
| FLG      | MCL1      | PLEKHA4  | SETDB1  |
| LGALS3BP | MAGED2    | CDK4     | CDK6    |
| CALU     | MSN       | CDK2     | PRKAR1A |
| ILF3     | RRBP1     | KRT31    | KRT6B   |
| ACADVL   | CDH1      | CAP1     | TPM3    |
| AEBP1    | GRB2      | AARS     | CDK2    |
| ABCE1    | HM13      | KRT31    | SLC23A1 |
| LYPD3    | USP22     | KRT5     | MDM2    |
| NAP1L1   | NCL       | PLAUR    | TUBA1A  |
| ACTR2    | ARPC1A    | FN1      | KRT31   |
| CDK2     | MARCKSL1  | CDK2     | DSP     |
| ELAVL1   | KDELRL    | AARS     | STAT1   |
| ELAVL1   | SERPINE2  | KRT31    | PKN1    |
| ELAVL1   | TTYH3     | KRT31    | KRT5    |
| CIRBP    | FN1       | CCT6A    | LDHB    |
| ELAVL1   | MLEC      | ANXA5    | CDK2    |
| ALDH1A3  | ELAVL1    | SQSTM1   | TUBA1A  |
| HNRNPU   | LAPTM4A   | S100A1   | S100A2  |
| FKBP9    | WARS      | AARS     | WARS    |
| ILF3     | LAMP1     | CDK2     | NAP1L1  |
| DMKN     | ELAVL1    | AARS     | FN1     |
| CANX     | PMP22     | ATP6V1B2 | FN1     |
| ELAVL1   | SEPN1     | MITF     | TFEC    |
| ELAVL1   | IFI6      | CDK2     | JUP     |
| MAGED2   | UBB       | CDK2     | MITF    |

|          |         |        |        |
|----------|---------|--------|--------|
| PRAME    | SNRPB   | CDK2   | PARP1  |
| TERF2IP  | TMSB10  | CDK2   | FASN   |
| LDHB     | TPI1    | FASN   | MDM2   |
| RPS24    | SERBP1  | SHC1   | TUBA1A |
| CDK2     | VAT1    | FN1    | PXN    |
| CUL1     | QPCT    | KPNB1  | SMAD4  |
| CUL1     | KRT6C   | PTK2   | PXN    |
| CD99     | PPIA    | ERBB3  | SYK    |
| ACTR2    | ARPC1B  | CDK2   | PGK1   |
| ATP6V1B2 | JUP     | EIF4A2 | SYK    |
| ABCE1    | FLOT1   | PGK1   | SYK    |
| HSPD1    | SCARB2  | SYK    | TUBA1A |
| GANAB    | PRKCSH  | NPM1   | SYK    |
| SERPINH1 | TMED9   | EIF3E  | FN1    |
| MYL12A   | MYL6    |        |        |
| CNDP2    | PDIA3   |        |        |
| IFITM3   | NAMPT   |        |        |
| ABCE1    | CD59    |        |        |
| GPNMB    | SMAD4   |        |        |
| ABCE1    | GNB1    |        |        |
| ICAM1    | IFI16   |        |        |
| GAPDH    | GAS7    |        |        |
| ACTR2    | CRTAP   |        |        |
| ABCE1    | GNS     |        |        |
| COX4I1   | TPM3    |        |        |
| PPT1     | VEGF    |        |        |
| ABCE1    | MFGE8   |        |        |
| LAPTM4B  | LYPD3   |        |        |
| CLCN7    | LYPD3   |        |        |
| CANX     | PLTP    |        |        |
| ATP1A1   | SSR2    |        |        |
| CTNNA1   | CTNNA1  |        |        |
| FBXW11   | YWHAZ   |        |        |
| CDK2     | SRRM2   |        |        |
| PUF60    | SDCBP   |        |        |
| FN1      | YWHAQ   |        |        |
| AKT1     | SFN     |        |        |
| CDK2     | PRKAR1A |        |        |
| CLIC4    | SHC1    |        |        |
| CDH1     | LMNA    |        |        |
| HNRNPU   | NONO    |        |        |
| SERPINH1 | VIM     |        |        |
| FN1      | TRIM28  |        |        |
| AHNAK    | HNRNPAB |        |        |
| MCL1     | USP9X   |        |        |
| ITCH     | UBAP2L  |        |        |
| ELAVL1   | SORT1   |        |        |
| FN1      | ILF3    |        |        |
| MED15    | ZC3H13  |        |        |
| TERF2IP  | XRCC5   |        |        |
| CSNK1A1  | DYNLL2  |        |        |
| S100A6   | S100B   |        |        |
| FN1      | PARP1   |        |        |
| FN1      | GRB2    |        |        |
| C1QBP    | MMP14   |        |        |
| CDK2     | CUL1    |        |        |
| FBXW11   | GLI3    |        |        |

|           |         |
|-----------|---------|
| DYNC1H1   | RPS24   |
| ELAVL1    | SGK1    |
| FN1       | SNRPB   |
| HNRNPU    | SRRM2   |
| GANAB     | JUP     |
| MAGED1    | TRIM28  |
| CTNNA1    | FBXW11  |
| EZR       | FN1     |
| FN1       | PRKDC   |
| FBXW11    | HNRNPU  |
| PA2G4     | YBX1    |
| DYNLL2    | MYO5A   |
| CST3      | CTSB    |
| CANX      | PTBP1   |
| ATP2A2    | SLC3A2  |
| HNRNPA2B1 | PGK1    |
| CD81      | NONO    |
| COPS6     | KRT5    |
| RCAN1     | USP22   |
| FN1       | MYL6    |
| GAPDH     | PGK1    |
| CAPNS1    | FN1     |
| ELAVL1    | SLC7A5  |
| CD63      | SDCBP   |
| CSNK1A1   | GLI3    |
| MBP       | PRKDC   |
| FN1       | KPNB1   |
| FN1       | HNRNPU  |
| PDIA3     | VIM     |
| FN1       | SND1    |
| C1QBP     | FN1     |
| HMGA1     | PA2G4   |
| FN1       | TLN1    |
| ACTR2     | CCT5    |
| ELAVL1    | STX7    |
| FN1       | TUBA1B  |
| COPS6     | FBXO7   |
| KRT14     | KRT5    |
| KPNB1     | LYST    |
| SF3B2     | YBX1    |
| ELAVL1    | FN1     |
| MAGED2    | NAP1L1  |
| FBXW11    | UBAP2L  |
| FASN      | TPM3    |
| ELAVL1    | LAPTM4A |
| FN1       | LDHB    |
| ABCE1     | MSN     |
| NUCB1     | PRKDC   |
| NTRK1     | YWHAZ   |
| CDK2      | RAC1    |
| ELAVL1    | SDCBP   |
| AKT1      | PRKDC   |
| CTTN      | GRB2    |
| ELAVL1    | PRKAR1A |
| KIAA1211  | NTRK1   |
| ERBB3     | SHC1    |
| CDH1      | KRT1    |



|          |          |
|----------|----------|
| FN1      | NONO     |
| FN1      | PXN      |
| ELAVL1   | SERPINH1 |
| CCT5     | CCT6A    |
| FN1      | VIM      |
| AHNAK    | LASP1    |
| AP2B1    | FN1      |
| NTRK1    | PTBP1    |
| ILF3     | RPS24    |
| ILF3     | KRT17    |
| PARP1    | TERF2IP  |
| FTH1     | GRB2     |
| AHNAK    | S100B    |
| FN1      | MYC      |
| ERBB3    | GRB2     |
| HSP90AB1 | NTRK1    |
| NTRK1    | PUF60    |
| CUL1     | KRT5     |
| FN1      | RAC1     |
| DYNC1H1  | NTRK1    |
| CSDE1    | GANAB    |
| ABCE1    | CTSA     |
| MAGED1   | NTRK1    |
| FN1      | PDIA6    |
| FN1      | SLC3A2   |
| FN1      | MIF      |
| CTNNA1   | CTTN     |
| CSDE1    | XRCC5    |
| IVNS1ABP | YBX1     |
| MYO5A    | NTRK1    |
| KRT10    | KRT5     |
| COX4I1   | PHB      |
| AHNAK    | ARHGDI1  |
| NTRK1    | TUBB     |
| CANX     | CCT6A    |
| ATP2A2   | SPP1     |
| FN1      | PPIA     |
| NTRK1    | PIGT     |
| CSDE1    | CUL1     |
| CANX     | L1CAM    |
| ELAVL1   | SUMF2    |
| HEXA     | USP22    |
| EZR      | HEXA     |
| FN1      | TUBB     |
| CUL1     | PSMB4    |
| DAG1     | ELAVL1   |
| HSPD1    | PDIA3    |
| FN1      | HSPD1    |
| FN1      | HMGA1    |
| ARF4     | ELAVL1   |
| NTRK1    | TLN1     |
| ACTR2    | ELAVL1   |
| TUBA1B   | TUBB     |
| CTTN     | SDC3     |
| SF3B2    | SRRM2    |
| CAPRIN1  | CIRBP    |
| AHCY     | MSN      |

|          |          |
|----------|----------|
| GLG1     | NTRK1    |
| FASN     | NTRK1    |
| NES      | NTRK1    |
| INTS1    | TGOLN2   |
| INTS1    | NTRK1    |
| HNRNPU   | LAMP2    |
| ELAVL1   | MARCKSL1 |
| ELAVL1   | FKBP9    |
| AP3D1    | NTRK1    |
| FN1      | RPS24    |
| CD99     | FTH1     |
| ATP6V1B2 | CSDE1    |
| CANX     | PRKCSH   |
| ERBB3    | TNS3     |
| NTRK1    | PCDHGC3  |
| GAS7     | HNRNPU   |
| CNP      | NTRK1    |
| NTRK1    | VGf      |
| IGSF3    | NTRK1    |
| BCAR1    | GRB2     |
| ELAVL1   | ITCH     |
| ELAVL1   | GRB2     |
| CTNNB1   | USP9X    |
| SGK1     | YWHAZ    |
| CALM3    | ELAVL1   |
| ELAVL1   | EZR      |
| CTSA     | NAMPT    |
| CANX     | ELAVL1   |
| COPS6    | TUBB     |
| ELAVL1   | LAMC1    |
| SND1     | USP22    |
| LAMC1    | NID1     |
| COL4A1   | NID1     |
| COL4A1   | COL4A2   |
| ELAVL1   | ZBTB20   |
| UBAP2L   | YBX1     |
| AKT1     | SMAD4    |
| CALML5   | YWHAQ    |
| GRB2     | ITCH     |
| ADNP     | MYC      |
| PARP1    | TUBB     |
| CDK2     | TSC22D1  |
| CALML5   | ZSCAN20  |
| FBLN1    | YWHAQ    |
| EZR      | WDR1     |
| ZNF24    | ZSCAN20  |
| ATP1A1   | CCT6A    |
| MYO5A    | RAB27A   |
| COPS6    | ZNF24    |
| CBX3     | FN1      |
| FBLN1    | NID1     |
| C1QBP    | MYC      |
| ACTR2    | STXBP1   |
| ADNP     | ZSCAN20  |
| SBSN     | ZSCAN20  |

| NF1_PrimaryMelanoma_TCGASKCM |        | TWT_PrimaryMelanoma_TCGASKCM |        |
|------------------------------|--------|------------------------------|--------|
| From                         | To     | From                         | To     |
| CDK2                         | LMNA   | CDC42                        | STMN1  |
| LMNA                         | NUMA1  | CDK2                         | MIF    |
| LMNA                         | SDCBP  | LMNA                         | NUMA1  |
| CTTN                         | LMNA   | LMNA                         | MDM2   |
| CTSD                         | MAPK1  | CDK2                         | MITF   |
| CAP1                         | TPM3   | CTTN                         | SDC3   |
| GRB2                         | VIM    | MAGED2                       | USP7   |
| AHNAK                        | LASP1  | CAP1                         | FASN   |
| S100A1                       | S100B  | GRB2                         | VIM    |
| AP2B1                        | GRB2   | AHNAK                        | LASP1  |
| ISG15                        | PGK1   | S100A1                       | S100B  |
| SELENBP1                     | TMED9  | AP2B1                        | FN1    |
| SAT1                         | VKORC1 | SLC15A3                      | TRIM27 |
| FTH1                         | SDCBP  | SAT1                         | VKORC1 |
| FTL                          | SDCBP  | FN1                          | RPS15A |
| STMN1                        | TPM3   | FTH1                         | SDCBP  |
| ITGB1                        | SPP1   | FTL                          | VKORC1 |
| GRB2                         | PHC2   | TPM3                         | TRIM27 |
| CBX3                         | MDM2   | MIF                          | YKT6   |
| TNFRSF14                     | VIM    | ITGB1                        | SPP1   |
| ARHGDI3                      | PDIA3  | GRB2                         | TRIM27 |
| CANX                         | DDOST  | CBX3                         | MDM2   |
| CDK2                         | CTSA   | TNFRSF14                     | VIM    |
| CDK2                         | SORT1  | ARHGDI3                      | PDIA3  |
| GNAS                         | HLA-A  | CANX                         | DDOST  |
| GNAS                         | GNB1   | CDK2                         | CTSA   |
| MSN                          | PGK1   | CDK2                         | SORT1  |
| FN1                          | GSN    | GNAS                         | HLA-A  |
| CCND1                        | CDK2   | EIF3E                        | TRIM27 |
| MDM2                         | PLK1   | GNAS                         | GNB1   |
| FLOT1                        | FN1    | NDRG1                        | SGK1   |
| ANKRD28                      | SDCBP  | MSN                          | PGK1   |
| PGK1                         | TPI1   | GAB2                         | GRB2   |
| MAGED2                       | TUBA1A | FN1                          | GSN    |
| STXBP1                       | TUBB2A | CCND1                        | CDK2   |
| MDM2                         | TUBB2A | MDM2                         | TRIM27 |
| MDM2                         | PARP1  | FLOT1                        | FN1    |
| CDK2                         | NOV    | CD63                         | SDCBP  |
| FN1                          | LMNA   | PGK1                         | TPI1   |
| LRPAP1                       | SORT1  | TUBA1A                       | TUBB2A |
| L1CAM                        | PEA15  | STXBP1                       | TUBB2A |
| LDHB                         | MIF    | MDM2                         | TUBB2A |
| CD63                         | ITGB1  | PARP1                        | SPP1   |
| TFAP2A                       | YBX1   | FN1                          | GRB2   |
| ANXA5                        | PDIA3  | LRPAP1                       | SORT1  |
| CANX                         | MDM2   | L1CAM                        | PEA15  |
| MDM2                         | RAB7A  | CD63                         | ITGB1  |
| CTSD                         | PSAP   | MORF4L1                      | TUBA1A |
| CANX                         | L1CAM  | TFAP2A                       | YBX1   |
| S100A13                      | VAT1   | ANXA5                        | PDIA3  |
| CAPNS1                       | FN1    | CANX                         | ITGB1  |
| CNDP2                        | GBP2   | MDM2                         | RAB7A  |
| ECH1                         | MDM2   | CTSD                         | PSAP   |
| ECH1                         | TIMP1  | CANX                         | L1CAM  |
| ISG15                        | STAT1  | CAPNS1                       | FN1    |

|          |          |          |          |
|----------|----------|----------|----------|
| STAT1    | STAT2    | CANX     | NDRG1    |
| CD44     | ITGB1    | ECH1     | MDM2     |
| CDC42    | MAP3K11  | ECH1     | TIMP1    |
| MDM2     | PDIA3    | CTTN     | STAT1    |
| GYPC     | PDIA3    | CD44     | ITGB1    |
| FN1      | PLAT     | CDC42    | MAP3K11  |
| IGFBP5   | SPP1     | ITGB1    | PDIA3    |
| PTTG1    | PTTG1IP  | GYPC     | PDIA3    |
| FN1      | MIA      | FN1      | PLAT     |
| ICAM1    | IFI16    | DSP      | MDM2     |
| HLA-A    | TAP1     | IGFBP5   | SPP1     |
| HLA-A    | TAP2     | PTTG1IP  | STX7     |
| CD63     | SDCBP    | FN1      | MIA      |
| HLA-A    | ITM2B    | PKN1     | VIM      |
| CBX3     | SP100    | HLA-A    | TAP1     |
| FECH     | TIMP2    | CD63     | VKORC1   |
| MMP14    | TIMP2    | MDM2     | TCEB1    |
| FN1      | YBX1     | HLA-A    | ITM2B    |
| CTSD     | MDM2     | CBX3     | SP100    |
| MAPK1    | MBP      | FECH     | TIMP2    |
| PDIA3    | TAPBP    | MMP14    | TIMP2    |
| AHNAK    | ARHGDI   | FLOT1    | YBX1     |
| SDC3     | TUBB2A   | CTSD     | MDM2     |
| CALM3    | MYO10    | MBP      | PKN1     |
| CALM3    | GRB2     | MBP      | PLP1     |
| ITGB1    | TGOLN2   | STX7     | YKT6     |
| MICAL1   | VIM      | PDIA3    | TAPBP    |
| CDK2     | GRN      | AHNAK    | ARHGDI   |
| TPP1     | USP7     | SDC3     | TUBB2A   |
| CTSB     | PARP1    | CALM3    | MYO10    |
| FN1      | SRM      | CALM3    | GRB2     |
| ACACB    | ANKRD28  | ARHGDI   | COTL1    |
| CAPRIN1  | CDK2     | CDK2     | GRN      |
| PHC2     | SDCBP    | FN1      | ST13     |
| FASN     | MDM2     | TPP1     | USP7     |
| ITGB1    | LGALS3BP | CTSB     | PARP1    |
| CALU     | MSN      | PHC2     | SDCBP    |
| MDM2     | RRBP1    | FASN     | LMNA     |
| CUTA     | GRB2     | H2AFZ    | MORF4L1  |
| CNDP2    | PDIA3    | ITGB1    | LGALS3BP |
| GBP1     | ISG15    | CALU     | MSN      |
| ISG15    | PLOD3    | MDM2     | RRBP1    |
| CTSD     | WARS     | CUTA     | GRB2     |
| LDHB     | TPI1     | GNAS     | MAGED2   |
| CDK2     | COPA     | CNDP2    | PDIA3    |
| CDK2     | MARCKSL1 | CTSD     | WARS     |
| CDK2     | VAT1     | PRAME    | TCEB1    |
| CIRBP    | MDM2     | LDHB     | TPI1     |
| ACTR2    | ARPC1B   | CDK2     | COPA     |
| ATP6V1B2 | FN1      | AHNAK    | STMN1    |
| GALNT2   | TGOLN2   | CDK2     | MARCKSL1 |
| AK2      | MDM2     | CDK2     | VAT1     |
| DPP7     | SELENBP1 | CIRBP    | MDM2     |
| MDM2     | TMED9    | ARPC1B   | CALU     |
| CAP1     | MYL12A   | ATP6V1B2 | FN1      |
| FTL      | VKORC1   | MDM2     | TMED9    |
| IFITM3   | VKORC1   | CAP1     | MYL12A   |

|          |          |          |        |
|----------|----------|----------|--------|
| PDIA3    | PLXNA1   | SLC15A3  | VKORC1 |
| LRRCS59  | MDM2     | IFITM3   | VKORC1 |
| IFI16    | MDM2     | PDIA3    | PLXNA1 |
| GNAS     | MAGED2   | IFI16    | MDM2   |
| C1QB     | FN1      | ABL2     | GPX1   |
| GPX1     | SELENBP1 | MDM2     | NUCB1  |
| MDM2     | NUCB1    | CRTAP    | SP100  |
| CRTAP    | SP100    | CNDP2    | GNS    |
| CNDP2    | GNS      | SERPINE2 | SP100  |
| SERPINE2 | SP100    | FECH     | MDM2   |
| FECH     | MDM2     | TIMP2    | TIMP3  |
| TIMP2    | TIMP3    | CANX     | PLTP   |
| CANX     | PLTP     | ARHGDI3  | CDC42  |
| ITPK1    | MAPK1    | ARHGDI3  | CDK2   |
| CDK2     | PARP1    | CTTN     | LMNA   |
| LMNA     | PARP1    | LMNA     | USP7   |
| CAP1     | FN1      | CAP1     | TPM3   |
| FN1      | VIM      | CYTH3    | GNAQ   |
| ISG15    | MSN      | AP2B1    | GRB2   |
| SAT1     | TUBB2A   | SAT1     | TUBB2A |
| FTH1     | FTL      | FTL      | SDCBP  |
| FN1      | GRB2     | STMN1    | TPM3   |
| FN1      | MSN      | AHNAK    | GRB2   |
| CEBPA    | PARP1    | ARHGDI3  | MDM2   |
| FN1      | PARP1    | EIF3E    | NUMA1  |
| FN1      | ITGB1    | GNAQ     | GNAS   |
| NUMA1    | PTTG1    | GNAS     | MDM2   |
| PKN1     | VIM      | MAGED2   | TUBA1A |
| FLOT1    | YBX1     | LMNA     | PARP1  |
| MBP      | PKN1     | ABL2     | MDM2   |
| GRB2     | MICAL1   | LDHB     | MIF    |
| MYL12A   | MYL9     | CANX     | PDIA3  |
| ARPC1B   | CALU     | FASN     | NDRG1  |
| BRCA2    | CDK2     | GNAQ     | GNB1   |
| CDK2     | NUMA1    | MDM2     | PDIA3  |
| CTTN     | STAT1    | PKN1     | TUBA1A |
| BRCA2    | PCNA     | FN1      | YBX1   |
| CDK2     | VIM      | AHNAK    | MDM2   |
| FTH1     | SPP1     | FASN     | MDM2   |
| MDM2     | PCNA     | CNDP2    | LDHB   |
| CDK2     | TUBB2A   |          |        |
| ITGB1    | PDIA3    |          |        |
| BRCA2    | MORF4L1  |          |        |
| GBP2     | GNS      |          |        |
| CDK2     | PDIA3    |          |        |
| RCAN1    | STAT2    |          |        |
| MDM2     | TCEB1    |          |        |
| ICAM1    | YBX1     |          |        |
| FBLN1    | NOV      |          |        |
| CTSD     | LDHB     |          |        |
| MBP      | PLP1     |          |        |
| H2AFZ    | MORF4L1  |          |        |
| PRAME    | TCEB1    |          |        |
| FBLN1    | IFI30    |          |        |
| IFI30    | TIMP3    |          |        |
| BUB1     | CDC42    |          |        |
| ARHGDI3  | CDK2     |          |        |

|          |         |
|----------|---------|
| CTTN     | GRB2    |
| AHNAK    | ISG15   |
| FTH1     | GRB2    |
| MDM2     | S100B   |
| CDC42    | GRB2    |
| CBX3     | FN1     |
| ARHGDI1A | CDC42   |
| ABL2     | GRB2    |
| CANX     | PDIA3   |
| FN1      | RAB7A   |
| BUB1     | SVIL    |
| DAPK1    | SVIL    |
| AHNAK    | CDC42   |
| CNDP2    | LDHB    |
| FN1      | LDHB    |
| CDC42    | STMN1   |
| CIRBP    | FN1     |
| MAGED2   | TPM3    |
| ABL2     | GPX1    |
| DAPK1    | IFI30   |
| CDK2     | PIN1    |
| CCND1    | MAPK1   |
| CAPRIN1  | MDM2    |
| CNKSR1   | PIN1    |
| MAP3K11  | PIN1    |
| CAPRIN1  | PIN1    |
| ATP6V1B2 | PIN1    |
| CDK2     | LYN     |
| PARP1    | SPP1    |
| DENND2C  | LYN     |
| LYN      | SRC     |
| MDM2     | SRC     |
| LYN      | TTYH3   |
| CDK2     | FLNC    |
| LMNA     | MDM2    |
| MAPK1    | YBX1    |
| FLNB     | ISG15   |
| FLNB     | MDM2    |
| FLNC     | FN1     |
| MAPK1    | PEA15   |
| ABL2     | MDM2    |
| FLNB     | FLNC    |
| CAPN3    | FLNC    |
| FLNC     | NAT8L   |
| TAP1     | TAPBP   |
| TAP1     | TAP2    |
| FBLN1    | FN1     |
| AHNAK    | FLNB    |
| FAT3     | NAT8L   |
| LMNA     | MORF4L1 |
| LMNA     | RB1     |
| ANP32A   | VPS72   |
| CAP1     | FASN    |
| CLP1     | VPS72   |
| FN1      | LASP1   |
| MDM2     | S100A1  |
| ISG15    | LMNA    |

|          |         |
|----------|---------|
| MDM2     | TPM3    |
| SPP1     | VPS72   |
| HDAC5    | PARP1   |
| CLP1     | HMCN1   |
| MDM2     | PGK1    |
| MORF4L1  | TUBA1A  |
| ACTR2    | STXBP1  |
| MORF4L1  | TUBB2A  |
| MDM2     | MIF     |
| MORF4L1  | VPS72   |
| RB1      | TFAP2A  |
| CANX     | ITGB1   |
| PSAP     | THRAP3  |
| GBP2     | SAT1    |
| MDM2     | TPI1    |
| GNB1     | HDAC5   |
| PKN1     | TUBA1A  |
| PDIA3    | TAP1    |
| LMNA     | THRAP3  |
| AHNAK    | MDM2    |
| H2AFZ    | VPS72   |
| ADAR     | HDAC5   |
| ACTR2    | CALU    |
| CNDP2    | PEPD    |
| ISG15    | WARS    |
| FN1      | STMN1   |
| PEPD     | SPP1    |
| ANP32A   | ARPC1B  |
| LGALS3BP | MAGED2  |
| ACTR2    | CRTAP   |
| GNS      | PEPD    |
| CDK2     | MIF     |
| PSMF1    | QKI     |
| MIF      | YKT6    |
| TUBA1A   | TUBB2A  |
| FN1      | IGF2R   |
| ECH1     | GSTO1   |
| FN1      | GSTO1   |
| PTTG1IP  | STX7    |
| STX7     | YKT6    |
| FBXO7    | PSMF1   |
| FASN     | TPM3    |
| FN1      | QKI     |
| CDV3     | RRBP1   |
| CDV3     | STX7    |
| LMNA     | LRRC59  |
| NUCB1    | WARS    |
| CIRBP    | RTN4    |
| ARRB2    | MAPK1   |
| LMNA     | USP7    |
| PDIA3    | VIM     |
| AHNAK    | GRB2    |
| ARRB2    | SRPK2   |
| MDM2     | SLC12A2 |
| LRPAP1   | RTN4    |
| PCNA     | YBX1    |
| CALU     | PCNA    |

|          |         |
|----------|---------|
| MCOLN3   | SRPK2   |
| KCNQ5    | MCOLN3  |
| HEXA     | PCNA    |
| MCOLN3   | SLC12A2 |
| CLCN7    | MCOLN3  |
| CDK2     | PRC1    |
| MAPK1    | PML     |
| USP11    | USP7    |
| PRC1     | SH3KBP1 |
| ABI2     | SH3KBP1 |
| ISG15    | VIM     |
| FTL      | GRB2    |
| GRB2     | SH3KBP1 |
| GNAS     | NUCB1   |
| MDM2     | USP7    |
| PML      | USP7    |
| ATP6V1B2 | TUBA1A  |
| DDN      | SH3KBP1 |
| NET1     | USP11   |
| MAG11    | NET1    |
| PML      | SP100   |
| ACTR2    | CTTN    |
| ABI2     | MBP     |
| ABI2     | GPX3    |
| FN1      | RPS15A  |
| GALNT2   | RPS15A  |
| IFI30    | PRC1    |
| CDK2     | TPM3    |
| EGFR     | MEGF6   |
| CTTN     | EGFR    |
| EGFR     | TPM3    |
| ARHGDI1A | MSN     |
| GNAS     | MDM2    |
| CDK2     | MSN     |
| GSN      | MDM2    |
| EGFR     | FN1     |
| ANXA5    | CDK2    |
| CD44     | MSN     |
| HLA-A    | TAPBP   |
| SDC3     | TUBA1A  |
| EGFR     | TPP1    |
| ADAR     | EGFR    |
| CDK2     | LDHB    |
| CDK2     | RPS15A  |
| CDK2     | STMN1   |
| CNP      | EGFR    |
| ISG15    | PALLD   |
| FBXO7    | PINK1   |
| FASN     | ISG15   |
| PINK1    | VIM     |
| MAGED2   | USP7    |
| ABI2     | CAP1    |
| ABI2     | PRKAA2  |
| DDOST    | FN1     |
| BAIAP2L1 | MDM2    |
| BAIAP2L1 | PRKAA2  |
| CD44     | FN1     |



|          |         |
|----------|---------|
| CD44     | PTPRC   |
| ICAM1    | MSN     |
| LDHB     | PGK1    |
| CDV3     | QKI     |
| CD63     | VKORC1  |
| GRB2     | ROS1    |
| ARHGDI1A | MDM2    |
| FASN     | FN1     |
| LGALS3BP | TUBA1A  |
| CALU     | WARS    |
| LMNA     | SHMT2   |
| CTTN     | SHMT2   |
| SHMT2    | TPM3    |
| SAMD9    | SHMT2   |
| MDM2     | SHMT2   |
| PARP1    | SHMT2   |
| MDM2     | UBE2D2  |
| SHMT2    | STAT1   |
| FBXO7    | UBE2D2  |
| COPA     | SHMT2   |
| LYN      | SLITRK4 |
| CDC42    | SYNE1   |
| LMNA     | SYNE1   |
| FASN     | LMNA    |
| CDC42    | SSX2IP  |
| HDAC5    | NUMA1   |
| CAP1     | CDC42   |
| HDAC5    | PKN1    |
| CHCHD3   | MDM2    |
| ITGB1    | TUBA1A  |
| PKN1     | SSX2IP  |
| AHNAK    | STMN1   |
| SSX2IP   | SYT17   |
| PHC2     | SSX2IP  |
| CHCHD3   | SSX2IP  |
| TNFRSF14 | UGGT1   |
| HLA-A    | UGGT1   |
| CDK2     | USP7    |
| ICAM1    | YBX2    |

**Supplemental Table S2. Drug combination predictions.** For each melanoma genomic subgroup-specific signaling network based on a unique combination of root gene and gene expression dataset, drug combinations and corresponding scores generated are shown.

| BRAF_PrimaryMelanoma_GSE15605 |                 |             | NRAS_PrimaryMelanoma_GSE15605 |                    |             |
|-------------------------------|-----------------|-------------|-------------------------------|--------------------|-------------|
| drug1                         | drug2           | score       | drug1                         | drug2              | score       |
| tretinoin                     | etoposide       | 10.04233281 | tretinoin                     | estradiol          | 29.68027351 |
| amitriptyline                 | tretinoin       | 10.03778148 | dasatinib                     | tretinoin          | 25.96208168 |
| fluticasone                   | tretinoin       | 9.536022682 | tretinoin                     | fluvastatin        | 24.42506327 |
| dasatinib                     | tretinoin       | 9.402201405 | tretinoin                     | doxorubicin        | 23.80265741 |
| tretinoin                     | dinoprostone    | 9.209737795 | fluticasone                   | tretinoin          | 22.75853728 |
| dabrafenib                    | tretinoin       | 9.153716567 | tretinoin                     | celecoxib          | 22.62813817 |
| tretinoin                     | vemurafenib     | 8.564421509 | chloroquine                   | tretinoin          | 21.81070144 |
| tretinoin                     | calcitriol      | 8.430968592 | levofloxacin                  | tretinoin          | 21.30102114 |
| tretinoin                     | celecoxib       | 7.977309093 | tretinoin                     | dinoprostone       | 20.55412755 |
| tretinoin                     | doxorubicin     | 7.571390368 | tretinoin                     | fexofenadine       | 20.39244678 |
| tretinoin                     | chloroquine     | 7.357754521 | tretinoin                     | fluoxetine         | 17.80600005 |
| tretinoin                     | chloramphenicol | 7.185917304 | dasatinib                     | estradiol          | 17.56763743 |
| amitriptyline                 | etoposide       | 6.721116295 | tretinoin                     | fludarabine        | 17.40349962 |
| tretinoin                     | mifepristone    | 6.570910254 | estradiol                     | doxorubicin        | 17.22767198 |
| fluticasone                   | etoposide       | 6.412809204 | tretinoin                     | gatifloxacin       | 17.05671464 |
| dasatinib                     | etoposide       | 6.331696494 | fluvastatin                   | estradiol          | 16.60978178 |
| tretinoin                     | decitabine      | 6.284707015 | tretinoin                     | methylprednisolone | 16.3502235  |
| tretinoin                     | bosutinib       | 6.225008089 | celecoxib                     | estradiol          | 15.66051316 |
| dabrafenib                    | etoposide       | 6.166516491 | tretinoin                     | mifepristone       | 15.25444753 |
| dinoprostone                  | etoposide       | 6.093212124 | tretinoin                     | azelastine         | 15.14290602 |
| vemurafenib                   | etoposide       | 5.769530451 | fluticasone                   | estradiol          | 15.01418114 |
| tretinoin                     | paclitaxel      | 5.754127992 | tretinoin                     | palbociclib        | 14.9594583  |
| calcitriol                    | etoposide       | 5.578318538 | estradiol                     | dinoprostone       | 14.65428705 |
| tretinoin                     | pirfenidone     | 5.576148856 | chloroquine                   | estradiol          | 14.31899905 |
| celecoxib                     | etoposide       | 5.3739219   | dasatinib                     | doxorubicin        | 14.06778472 |
| amitriptyline                 | dinoprostone    | 5.209175688 | levofloxacin                  | estradiol          | 13.9333812  |
| etoposide                     | doxorubicin     | 5.002395328 | tretinoin                     | pirfenidone        | 13.36281088 |
| chloroquine                   | etoposide       | 4.999631047 | fexofenadine                  | estradiol          | 13.33906636 |
| chloramphenicol               | etoposide       | 4.887839286 | tretinoin                     | clarithromycin     | 13.32240433 |
| tretinoin                     | fluorometholone | 4.817561576 | fluvastatin                   | doxorubicin        | 13.30199233 |
| fluticasone                   | dinoprostone    | 4.78505507  | tretinoin                     | flouxuridine       | 13.18772517 |
| dinoprostone                  | calcitriol      | 4.771322449 | celecoxib                     | doxorubicin        | 12.54585405 |
| amitriptyline                 | calcitriol      | 4.763485566 | tretinoin                     | cilostazol         | 12.34773437 |
| tretinoin                     | fluvastatin     | 4.665737776 | fluticasone                   | doxorubicin        | 12.01722326 |
| dasatinib                     | dinoprostone    | 4.665345563 | doxorubicin                   | dinoprostone       | 11.74607121 |
| tretinoin                     | fluoxetine      | 4.571350299 | fluoxetine                    | estradiol          | 11.58520531 |
| dabrafenib                    | dinoprostone    | 4.529284268 | chloroquine                   | doxorubicin        | 11.45972605 |
| tretinoin                     | temsirolimus    | 4.510057646 | fludarabine                   | estradiol          | 11.27075207 |
| mifepristone                  | etoposide       | 4.469611045 | estradiol                     | gatifloxacin       | 11.15637549 |
| tretinoin                     | latanoprost     | 4.401969455 | levofloxacin                  | doxorubicin        | 11.15031816 |
| amitriptyline                 | doxorubicin     | 4.386479913 | dasatinib                     | dinoprostone       | 11.10196994 |
| fluticasone                   | calcitriol      | 4.37445742  | estradiol                     | methylprednisolone | 10.6942771  |
| dinoprostone                  | doxorubicin     | 4.327400246 | fexofenadine                  | doxorubicin        | 10.67471217 |
| decitabine                    | etoposide       | 4.270596388 | fluvastatin                   | dinoprostone       | 10.55961137 |
| dasatinib                     | calcitriol      | 4.26462334  | celecoxib                     | dinoprostone       | 10.16398543 |
| vemurafenib                   | dinoprostone    | 4.237699444 | dasatinib                     | celecoxib          | 9.998305571 |
| etoposide                     | bosutinib       | 4.145991744 | estradiol                     | palbociclib        | 9.925429505 |
| dabrafenib                    | calcitriol      | 4.140151399 | estradiol                     | azelastine         | 9.905247297 |
| fluticasone                   | doxorubicin     | 4.053204964 | estradiol                     | mifepristone       | 9.87722052  |
| calcitriol                    | doxorubicin     | 3.960059109 | fluvastatin                   | celecoxib          | 9.654087261 |
| dasatinib                     | doxorubicin     | 3.959727076 | dasatinib                     | fluvastatin        | 9.406760358 |

|                 |                 |             |                    |                    |             |
|-----------------|-----------------|-------------|--------------------|--------------------|-------------|
| celecoxib       | dinoprostone    | 3.947744326 | fluoxetine         | doxorubicin        | 9.270202356 |
| paclitaxel      | etoposide       | 3.914010074 | fluticasone        | dinoprostone       | 9.192804718 |
| vemurafenib     | calcitriol      | 3.873618047 | fludarabine        | doxorubicin        | 9.017761072 |
| dabrafenib      | doxorubicin     | 3.84619026  | gatifloxacin       | doxorubicin        | 8.927982117 |
| fluticasone     | amitriptyline   | 3.825479673 | estradiol          | pirfenidone        | 8.815665992 |
| etoposide       | pirfenidone     | 3.749863009 | estradiol          | clarithromycin     | 8.713855415 |
| dasatinib       | amitriptyline   | 3.637540364 | chloroquine        | dinoprostone       | 8.712254914 |
| celecoxib       | calcitriol      | 3.608578593 | estradiol          | floxuridine        | 8.654297895 |
| vemurafenib     | doxorubicin     | 3.598581445 | methylprednisolone | doxorubicin        | 8.558184041 |
| dabrafenib      | amitriptyline   | 3.508802927 | levofloxacin       | dinoprostone       | 8.437355881 |
| chloroquine     | dinoprostone    | 3.386195477 | fexofenadine       | dinoprostone       | 8.077468664 |
| dinoprostone    | bosutinib       | 3.361680718 | estradiol          | cilostazol         | 7.996567112 |
| celecoxib       | doxorubicin     | 3.352272515 | palbociclib        | doxorubicin        | 7.945101217 |
| amitriptyline   | vemurafenib     | 3.282914327 | azelastine         | doxorubicin        | 7.926766466 |
| chloramphenicol | dinoprostone    | 3.277679975 | mifepristone       | doxorubicin        | 7.902764549 |
| etoposide       | fluorometholone | 3.276125224 | fluticasone        | celecoxib          | 7.60208222  |
| etoposide       | fluvastatin     | 3.173620768 | chloroquine        | celecoxib          | 7.074874531 |
| amitriptyline   | bosutinib       | 3.105293037 | doxorubicin        | pirfenidone        | 7.055984302 |
| etoposide       | fluoxetine      | 3.093991478 | doxorubicin        | clarithromycin     | 6.973335144 |
| chloroquine     | calcitriol      | 3.093323657 | fluoxetine         | dinoprostone       | 6.966269428 |
| calcitriol      | bosutinib       | 3.075016938 | doxorubicin        | floxuridine        | 6.926118267 |
| etoposide       | temsirolimus    | 3.067010848 | levofloxacin       | celecoxib          | 6.755824799 |
| amitriptyline   | celecoxib       | 3.059266572 | gatifloxacin       | dinoprostone       | 6.755163416 |
| mifepristone    | dinoprostone    | 2.996581294 | fludarabine        | dinoprostone       | 6.735301448 |
| chloramphenicol | calcitriol      | 2.993951478 | fluticasone        | fluvastatin        | 6.636826622 |
| etoposide       | latanoprost     | 2.992108422 | dasatinib          | fluticasone        | 6.588803602 |
| dasatinib       | fluticasone     | 2.95570444  | methylprednisolone | dinoprostone       | 6.475363748 |
| chloroquine     | doxorubicin     | 2.914393927 | fexofenadine       | celecoxib          | 6.467661655 |
| decitabine      | dinoprostone    | 2.891725788 | doxorubicin        | cilostazol         | 6.398076291 |
| fluticasone     | dabrafenib      | 2.840158852 | palbociclib        | dinoprostone       | 6.12142919  |
| chloramphenicol | doxorubicin     | 2.825835202 | chloroquine        | fluvastatin        | 6.068894098 |
| doxorubicin     | bosutinib       | 2.811645685 | azelastine         | dinoprostone       | 5.998120295 |
| dinoprostone    | pirfenidone     | 2.798040676 | dasatinib          | chloroquine        | 5.985471005 |
| fluticasone     | bosutinib       | 2.75706947  | mifepristone       | dinoprostone       | 5.901118531 |
| mifepristone    | calcitriol      | 2.737180971 | levofloxacin       | fluvastatin        | 5.71428336  |
| fluticasone     | vemurafenib     | 2.657316008 | dasatinib          | levofloxacin       | 5.605510584 |
| dasatinib       | bosutinib       | 2.656423115 | fluvastatin        | fexofenadine       | 5.470546155 |
| dasatinib       | dabrafenib      | 2.641961499 | fluoxetine         | celecoxib          | 5.460431003 |
| decitabine      | calcitriol      | 2.641615431 | celecoxib          | gatifloxacin       | 5.40750656  |
| paclitaxel      | dinoprostone    | 2.624192649 | dinoprostone       | pirfenidone        | 5.39761011  |
| mifepristone    | doxorubicin     | 2.583583293 | dasatinib          | fexofenadine       | 5.366412976 |
| dabrafenib      | bosutinib       | 2.571172584 | dinoprostone       | clarithromycin     | 5.276222313 |
| calcitriol      | pirfenidone     | 2.55794544  | dinoprostone       | floxuridine        | 5.262773246 |
| decitabine      | doxorubicin     | 2.488922727 | celecoxib          | methylprednisolone | 5.183526998 |
| fluticasone     | celecoxib       | 2.476762512 | fludarabine        | celecoxib          | 5.178558673 |
| dasatinib       | vemurafenib     | 2.471878141 | celecoxib          | palbociclib        | 5.167003519 |
| vemurafenib     | bosutinib       | 2.405646452 | celecoxib          | azelastine         | 4.802719051 |
| paclitaxel      | calcitriol      | 2.397029093 | dinoprostone       | cilostazol         | 4.778677563 |
| dabrafenib      | vemurafenib     | 2.370573739 | fluvastatin        | palbociclib        | 4.597878416 |
| pirfenidone     | doxorubicin     | 2.370094428 | dasatinib          | palbociclib        | 4.596513707 |
| dasatinib       | celecoxib       | 2.304103533 | fluvastatin        | gatifloxacin       | 4.572652465 |
| paclitaxel      | doxorubicin     | 2.262502688 | celecoxib          | mifepristone       | 4.533740348 |
| celecoxib       | bosutinib       | 2.241381402 | fluvastatin        | fluoxetine         | 4.517959438 |
| amitriptyline   | pirfenidone     | 2.236933029 | dasatinib          | gatifloxacin       | 4.485163186 |
| dabrafenib      | celecoxib       | 2.209721115 | celecoxib          | pirfenidone        | 4.463607909 |
| dinoprostone    | fluorometholone | 2.20194441  | dasatinib          | fluoxetine         | 4.393840063 |
| dinoprostone    | fluoxetine      | 2.176423619 | fluvastatin        | methylprednisolone | 4.383252659 |

|                 |                 |             |                    |                    |             |
|-----------------|-----------------|-------------|--------------------|--------------------|-------------|
| amitriptyline   | chloroquine     | 2.170443217 | dasatinib          | methylprednisolone | 4.299387196 |
| dinoprostone    | fluvastatin     | 2.12816188  | celecoxib          | floxuridine        | 4.266908489 |
| vemurafenib     | celecoxib       | 2.06746439  | celecoxib          | clarithromycin     | 4.223614591 |
| dinoprostone    | temsirolimus    | 2.061394767 | fluvastatin        | fludarabine        | 4.196509069 |
| amitriptyline   | chloramphenicol | 2.044573139 | fluvastatin        | azelastine         | 4.062286749 |
| dinoprostone    | latanoprost     | 2.020268159 | dasatinib          | fludarabine        | 4.047058218 |
| calcitriol      | fluorometholone | 2.011373315 | dasatinib          | azelastine         | 3.984960131 |
| calcitriol      | fluoxetine      | 1.988782177 | fluvastatin        | pirfenidone        | 3.896852329 |
| calcitriol      | fluvastatin     | 1.943940059 | dasatinib          | pirfenidone        | 3.868655326 |
| fluorometholone | doxorubicin     | 1.897643733 | celecoxib          | cilostazol         | 3.674172913 |
| calcitriol      | temsirolimus    | 1.882987785 | fluvastatin        | mifepristone       | 3.670902393 |
| amitriptyline   | mifepristone    | 1.868111092 | fluvastatin        | floxuridine        | 3.654468164 |
| doxorubicin     | fluoxetine      | 1.861250312 | dasatinib          | floxuridine        | 3.602095215 |
| amitriptyline   | decitabine      | 1.852297828 | fluvastatin        | clarithromycin     | 3.571539203 |
| calcitriol      | latanoprost     | 1.845489124 | dasatinib          | mifepristone       | 3.538956276 |
| fluticasone     | pirfenidone     | 1.844348393 | dasatinib          | clarithromycin     | 3.503204382 |
| fluvastatin     | doxorubicin     | 1.834783993 | fluticasone        | chloroquine        | 3.192383604 |
| doxorubicin     | temsirolimus    | 1.776517537 | fluvastatin        | cilostazol         | 2.977411463 |
| chloroquine     | bosutinib       | 1.766779567 | dasatinib          | cilostazol         | 2.871376501 |
| doxorubicin     | latanoprost     | 1.739704783 | fluticasone        | levofloxacin       | 2.845908523 |
| dasatinib       | pirfenidone     | 1.728335647 | fluticasone        | palbociclib        | 2.745829565 |
| chloramphenicol | bosutinib       | 1.690823235 | fluticasone        | fexofenadine       | 2.72451906  |
| dabrafenib      | pirfenidone     | 1.660770854 | chloroquine        | palbociclib        | 2.398951129 |
| amitriptyline   | paclitaxel      | 1.636141558 | chloroquine        | levofloxacin       | 2.352756489 |
| pirfenidone     | bosutinib       | 1.61218469  | fluticasone        | gatifloxacin       | 2.274968011 |
| vemurafenib     | pirfenidone     | 1.553854276 | chloroquine        | fexofenadine       | 2.252401947 |
| mifepristone    | bosutinib       | 1.545432377 | fluticasone        | pirfenidone        | 2.184087161 |
| fluticasone     | chloroquine     | 1.53674381  | fluticasone        | methylprednisolone | 2.180738566 |
| amitriptyline   | fluoxetine      | 1.533911371 | levofloxacin       | palbociclib        | 2.173169111 |
| decitabine      | bosutinib       | 1.508371174 | fexofenadine       | palbociclib        | 2.080474694 |
| celecoxib       | pirfenidone     | 1.448276384 | fluticasone        | fluoxetine         | 2.048379232 |
| fluticasone     | chloramphenicol | 1.414540621 | fluticasone        | azelastine         | 2.023157718 |
| amitriptyline   | fluorometholone | 1.382292556 | levofloxacin       | fexofenadine       | 1.937982316 |
| paclitaxel      | bosutinib       | 1.353442468 | fluticasone        | floxuridine        | 1.911020711 |
| dasatinib       | chloroquine     | 1.346579236 | chloroquine        | gatifloxacin       | 1.88008115  |
| amitriptyline   | fluvastatin     | 1.327519053 | chloroquine        | pirfenidone        | 1.87442707  |
| fluticasone     | decitabine      | 1.310778071 | chloroquine        | methylprednisolone | 1.802207967 |
| amitriptyline   | temsirolimus    | 1.294061116 | fluticasone        | clarithromycin     | 1.776898091 |
| fluticasone     | mifepristone    | 1.291781192 | gatifloxacin       | palbociclib        | 1.737733288 |
| amitriptyline   | latanoprost     | 1.284189506 | fluticasone        | fludarabine        | 1.721855789 |
| dabrafenib      | chloroquine     | 1.270048003 | chloroquine        | azelastine         | 1.672575703 |
| dasatinib       | chloramphenicol | 1.225248294 | levofloxacin       | pirfenidone        | 1.67099216  |
| vemurafenib     | chloroquine     | 1.188285256 | methylprednisolone | palbociclib        | 1.665756169 |
| bosutinib       | fluoxetine      | 1.183262475 | chloroquine        | fluoxetine         | 1.636382879 |
| fluticasone     | fluoxetine      | 1.167653586 | levofloxacin       | gatifloxacin       | 1.617067987 |
| dabrafenib      | chloramphenicol | 1.151719005 | palbociclib        | pirfenidone        | 1.612230203 |
| dasatinib       | decitabine      | 1.14827047  | fluoxetine         | palbociclib        | 1.610230524 |
| fluorometholone | bosutinib       | 1.138898725 | chloroquine        | floxuridine        | 1.60559575  |
| fluticasone     | paclitaxel      | 1.131486864 | fexofenadine       | pirfenidone        | 1.599717613 |
| dasatinib       | mifepristone    | 1.118619333 | levofloxacin       | methylprednisolone | 1.55008884  |
| chloroquine     | celecoxib       | 1.108588744 | fexofenadine       | gatifloxacin       | 1.548093523 |
| fluvastatin     | bosutinib       | 1.097833096 | azelastine         | palbociclib        | 1.544906951 |
| dabrafenib      | decitabine      | 1.082926488 | fluticasone        | mifepristone       | 1.499772785 |
| vemurafenib     | chloramphenicol | 1.077574004 | fexofenadine       | methylprednisolone | 1.483971306 |
| temsirolimus    | bosutinib       | 1.066203062 | chloroquine        | clarithromycin     | 1.468465751 |
| dasatinib       | fluoxetine      | 1.058307273 | levofloxacin       | azelastine         | 1.439095779 |
| dabrafenib      | mifepristone    | 1.051406916 | palbociclib        | floxuridine        | 1.43850397  |

|                 |                 |             |                    |                    |             |
|-----------------|-----------------|-------------|--------------------|--------------------|-------------|
| bosutinib       | latanoprost     | 1.050406896 | levofloxacin       | floxuridine        | 1.403233244 |
| vemurafenib     | decitabine      | 1.013210191 | fludarabine        | palbociclib        | 1.398899027 |
| dabrafenib      | fluoxetine      | 1.007763039 | fexofenadine       | azelastine         | 1.377712547 |
| chloramphenicol | celecoxib       | 1.005475837 | levofloxacin       | fluoxetine         | 1.359687797 |
| vemurafenib     | mifepristone    | 0.983719775 | palbociclib        | clarithromycin     | 1.357282805 |
| dasatinib       | paclitaxel      | 0.979860981 | fexofenadine       | floxuridine        | 1.343379693 |
| fluticasone     | fluorometholone | 0.961622185 | gatifloxacin       | pirfenidone        | 1.335761034 |
| celecoxib       | decitabine      | 0.945259408 | chloroquine        | fludarabine        | 1.319376367 |
| vemurafenib     | fluoxetine      | 0.94288559  | fexofenadine       | fluoxetine         | 1.301691635 |
| dabrafenib      | paclitaxel      | 0.920999345 | methylprednisolone | pirfenidone        | 1.280433654 |
| fluticasone     | fluvastatin     | 0.918445806 | levofloxacin       | clarithromycin     | 1.263035351 |
| celecoxib       | mifepristone    | 0.917904857 | gatifloxacin       | methylprednisolone | 1.23822875  |
| fluticasone     | latanoprost     | 0.902939462 | fluticasone        | cilostazol         | 1.221651872 |
| fluticasone     | temsirolimus    | 0.900242045 | mifepristone       | palbociclib        | 1.220250983 |
| chloroquine     | pirfenidone     | 0.898604431 | fexofenadine       | clarithromycin     | 1.209161805 |
| celecoxib       | fluoxetine      | 0.87922072  | fluoxetine         | pirfenidone        | 1.202718081 |
| vemurafenib     | paclitaxel      | 0.861707542 | azelastine         | pirfenidone        | 1.187909119 |
| dasatinib       | fluorometholone | 0.835266908 | gatifloxacin       | azelastine         | 1.149574398 |
| chloramphenicol | pirfenidone     | 0.827146634 | chloroquine        | mifepristone       | 1.146999977 |
| celecoxib       | paclitaxel      | 0.804055145 | floxuridine        | pirfenidone        | 1.122067206 |
| dasatinib       | fluvastatin     | 0.795540361 | gatifloxacin       | floxuridine        | 1.121279659 |
| dasatinib       | latanoprost     | 0.788488009 | methylprednisolone | azelastine         | 1.101958891 |
| dabrafenib      | fluorometholone | 0.785784602 | fluoxetine         | gatifloxacin       | 1.085359485 |
| dasatinib       | temsirolimus    | 0.781951999 | methylprednisolone | floxuridine        | 1.074836123 |
| decitabine      | pirfenidone     | 0.766471923 | levofloxacin       | fludarabine        | 1.047109705 |
| mifepristone    | pirfenidone     | 0.755363578 | clarithromycin     | pirfenidone        | 1.04331631  |
| dabrafenib      | fluvastatin     | 0.747798595 | fluoxetine         | methylprednisolone | 1.040403767 |
| dabrafenib      | latanoprost     | 0.742932785 | fludarabine        | pirfenidone        | 1.010997894 |
| dabrafenib      | temsirolimus    | 0.735628138 | gatifloxacin       | clarithromycin     | 1.008927129 |
| vemurafenib     | fluorometholone | 0.73519761  | fexofenadine       | fludarabine        | 1.002446258 |
| vemurafenib     | fluvastatin     | 0.699657055 | azelastine         | floxuridine        | 0.997559178 |
| vemurafenib     | latanoprost     | 0.695104494 | palbociclib        | cilostazol         | 0.992514952 |
| vemurafenib     | temsirolimus    | 0.688270103 | fluoxetine         | floxuridine        | 0.97255774  |
| celecoxib       | fluorometholone | 0.685978408 | methylprednisolone | clarithromycin     | 0.967137248 |
| pirfenidone     | fluoxetine      | 0.682780487 | fluoxetine         | azelastine         | 0.966602699 |
| paclitaxel      | pirfenidone     | 0.661632149 | chloroquine        | cilostazol         | 0.936093847 |
| celecoxib       | fluvastatin     | 0.652844501 | levofloxacin       | mifepristone       | 0.908292204 |
| celecoxib       | latanoprost     | 0.648517884 | azelastine         | clarithromycin     | 0.89789243  |
| celecoxib       | temsirolimus    | 0.642192552 | mifepristone       | pirfenidone        | 0.880600534 |
| fluorometholone | pirfenidone     | 0.562304498 | clarithromycin     | floxuridine        | 0.875792396 |
| pirfenidone     | fluvastatin     | 0.537057293 | fexofenadine       | mifepristone       | 0.869549882 |
| pirfenidone     | latanoprost     | 0.527990024 | fluoxetine         | clarithromycin     | 0.847736402 |
| pirfenidone     | temsirolimus    | 0.526412722 | fludarabine        | gatifloxacin       | 0.835021171 |
| chloroquine     | fluoxetine      | 0.36001794  | fludarabine        | methylprednisolone | 0.800434495 |
| decitabine      | fluoxetine      | 0.306398405 | fludarabine        | floxuridine        | 0.780670609 |
| chloramphenicol | fluoxetine      | 0.299553978 | fludarabine        | azelastine         | 0.744390786 |
| mifepristone    | fluoxetine      | 0.272893828 | levofloxacin       | cilostazol         | 0.742921411 |
| paclitaxel      | fluoxetine      | 0.239139816 | gatifloxacin       | mifepristone       | 0.724285313 |
| fluorometholone | fluoxetine      | 0.20884137  | pirfenidone        | cilostazol         | 0.717300182 |
| latanoprost     | fluoxetine      | 0.205464394 | fexofenadine       | cilostazol         | 0.71123282  |
| temsirolimus    | fluoxetine      | 0.19551107  | methylprednisolone | mifepristone       | 0.694285329 |
| fluvastatin     | fluoxetine      | 0.194497133 | mifepristone       | floxuridine        | 0.678533656 |
| chloroquine     | decitabine      | 0.172803314 | fludarabine        | clarithromycin     | 0.652205885 |
| chloroquine     | chloramphenicol | 0.105482788 | mifepristone       | azelastine         | 0.645705358 |
| chloroquine     | latanoprost     | 0.104450092 | gatifloxacin       | cilostazol         | 0.592445188 |
| chloroquine     | mifepristone    | 0.094600003 | fluoxetine         | fludarabine        | 0.58173502  |
| chloramphenicol | decitabine      | 0.088067155 | methylprednisolone | cilostazol         | 0.567906039 |

|                 |                 |             |                |                |             |
|-----------------|-----------------|-------------|----------------|----------------|-------------|
| decitabine      | latanoprost     | 0.087996536 | mifepristone   | clarithromycin | 0.565713972 |
| chloroquine     | fluorometholone | 0.085254491 | floxuridine    | cilostazol     | 0.553883616 |
| chloroquine     | paclitaxel      | 0.083144648 | azelastine     | cilostazol     | 0.528143183 |
| chloroquine     | temsirolimus    | 0.079812715 | fluoxetine     | mifepristone   | 0.501601592 |
| mifepristone    | decitabine      | 0.078944298 | clarithromycin | cilostazol     | 0.462738254 |
| decitabine      | fluorometholone | 0.071467515 | fluoxetine     | cilostazol     | 0.412739372 |
| decitabine      | paclitaxel      | 0.069390885 | fludarabine    | mifepristone   | 0.27185373  |
| chloroquine     | fluvastatin     | 0.068488824 | fludarabine    | cilostazol     | 0.226853568 |
| decitabine      | temsirolimus    | 0.066905759 | mifepristone   | cilostazol     | 0.192879462 |
| decitabine      | fluvastatin     | 0.057181044 |                |                |             |
| chloramphenicol | latanoprost     | 0.045015825 |                |                |             |
| mifepristone    | latanoprost     | 0.040043291 |                |                |             |
| fluorometholone | latanoprost     | 0.038955125 |                |                |             |
| temsirolimus    | latanoprost     | 0.036468628 |                |                |             |
| paclitaxel      | latanoprost     | 0.035249129 |                |                |             |
| fluvastatin     | latanoprost     | 0.029228284 |                |                |             |
| fluorometholone | temsirolimus    | 0.021702504 |                |                |             |
| chloramphenicol | fluorometholone | 0.020063778 |                |                |             |
| chloramphenicol | temsirolimus    | 0.018783112 |                |                |             |
| mifepristone    | fluorometholone | 0.017104854 |                |                |             |
| mifepristone    | temsirolimus    | 0.016013055 |                |                |             |
| paclitaxel      | fluorometholone | 0.015181961 |                |                |             |
| paclitaxel      | temsirolimus    | 0.0142129   |                |                |             |
| fluorometholone | fluvastatin     | 0.013027193 |                |                |             |
| fluvastatin     | temsirolimus    | 0.01219567  |                |                |             |
| chloramphenicol | mifepristone    | 0.005574798 |                |                |             |
| chloramphenicol | fluvastatin     | 0.005282208 |                |                |             |
| chloramphenicol | paclitaxel      | 0.005187039 |                |                |             |
| mifepristone    | fluvastatin     | 0.003619656 |                |                |             |
| paclitaxel      | fluvastatin     | 0.003367888 |                |                |             |
| mifepristone    | paclitaxel      | 0.003249525 |                |                |             |

| NF1_PrimaryMelanoma_GSE15605 |               |             | TWT_PrimaryMelanoma_GSE15605 |              |             |
|------------------------------|---------------|-------------|------------------------------|--------------|-------------|
| drug1                        | drug2         | score       | drug1                        | drug2        | score       |
| tretinoin                    | dexamethasone | 24.69211945 | tretinoin                    | brimonidine  | 1.039750252 |
| tretinoin                    | sirolimus     | 20.92964374 | tretinoin                    | cilostazol   | 0.869498749 |
| tretinoin                    | bosutinib     | 19.53833587 | brimonidine                  | cilostazol   | 0.734831402 |
| dexamethasone                | sirolimus     | 18.44093396 | tretinoin                    | progesterone | 0.617019295 |
| dexamethasone                | bosutinib     | 17.05878992 | tretinoin                    | fluvastatin  | 0.581468943 |
| tretinoin                    | celecoxib     | 16.61594953 | tretinoin                    | imiquimod    | 0.539935447 |
| tretinoin                    | doxorubicin   | 16.59050939 | brimonidine                  | progesterone | 0.522568779 |
| tretinoin                    | naproxen      | 14.85546126 | tretinoin                    | erythromycin | 0.481096328 |
| tretinoin                    | fludarabine   | 14.81503927 | brimonidine                  | fluvastatin  | 0.473418362 |
| dexamethasone                | doxorubicin   | 14.6445745  | tretinoin                    | estradiol    | 0.45340733  |
| bosutinib                    | sirolimus     | 14.59031975 | brimonidine                  | imiquimod    | 0.439602765 |
| dexamethasone                | celecoxib     | 14.49095053 | cilostazol                   | progesterone | 0.437001962 |
| tretinoin                    | indinavir     | 13.83134849 | fluvastatin                  | cilostazol   | 0.395899566 |
| tretinoin                    | capsaicin     | 13.82667055 | brimonidine                  | erythromycin | 0.391697335 |
| tretinoin                    | pirfenidone   | 13.70812207 | brimonidine                  | estradiol    | 0.369153604 |
| tretinoin                    | propranolol   | 13.64380425 | imiquimod                    | cilostazol   | 0.367621025 |
| naproxen                     | dexamethasone | 12.75808163 | cilostazol                   | erythromycin | 0.32755976  |
| fludarabine                  | dexamethasone | 12.68836523 | cilostazol                   | estradiol    | 0.3087074   |
| celecoxib                    | sirolimus     | 12.40783064 | fluvastatin                  | progesterone | 0.292240868 |
| sirolimus                    | doxorubicin   | 12.3908477  | imiquimod                    | progesterone | 0.27136652  |
| tretinoin                    | idarubicin    | 12.19581682 | erythromycin                 | progesterone | 0.241794527 |
| dexamethasone                | capsaicin     | 11.99922451 | estradiol                    | progesterone | 0.227878296 |

|               |              |             |              |              |             |
|---------------|--------------|-------------|--------------|--------------|-------------|
| dexamethasone | indinavir    | 11.85967396 | fluvastatin  | imiquimod    | 0.076210373 |
| dexamethasone | pirfenidone  | 11.76258734 | fluvastatin  | erythromycin | 0.067905397 |
| bosutinib     | doxorubicin  | 11.75205642 | fluvastatin  | estradiol    | 0.063997172 |
| dexamethasone | propranolol  | 11.74903354 | imiquimod    | erythromycin | 0.063055011 |
| tretinoin     | azelastine   | 11.35608495 | imiquimod    | estradiol    | 0.059425946 |
| tretinoin     | salmeterol   | 11.32215856 | erythromycin | estradiol    | 0.052950042 |
| naproxen      | sirolimus    | 11.09093666 |              |              |             |
| tretinoin     | olopatadine  | 11.06580485 |              |              |             |
| fludarabine   | sirolimus    | 11.060357   |              |              |             |
| bosutinib     | celecoxib    | 10.54478074 |              |              |             |
| tretinoin     | fluoxetine   | 10.54425581 |              |              |             |
| tretinoin     | prazosin     | 10.48916608 |              |              |             |
| dexamethasone | idarubicin   | 10.459148   |              |              |             |
| indinavir     | sirolimus    | 10.32612809 |              |              |             |
| sirolimus     | capsaicin    | 10.32428047 |              |              |             |
| pirfenidone   | sirolimus    | 10.23422865 |              |              |             |
| propranolol   | sirolimus    | 10.18668719 |              |              |             |
| tretinoin     | gatifloxacin | 10.05721387 |              |              |             |
| celecoxib     | doxorubicin  | 10.01359196 |              |              |             |
| tretinoin     | telmisartan  | 9.836469568 |              |              |             |
| dexamethasone | azelastine   | 9.72842259  |              |              |             |
| dexamethasone | salmeterol   | 9.6556257   |              |              |             |
| dexamethasone | olopatadine  | 9.503379148 |              |              |             |
| tretinoin     | clozapine    | 9.431452145 |              |              |             |
| tretinoin     | cetirizine   | 9.368770087 |              |              |             |
| fludarabine   | doxorubicin  | 9.202755879 |              |              |             |
| tretinoin     | dactinomycin | 9.190212676 |              |              |             |
| naproxen      | doxorubicin  | 9.186340118 |              |              |             |
| idarubicin    | sirolimus    | 9.105103622 |              |              |             |
| dexamethasone | fluoxetine   | 9.005097262 |              |              |             |
| dexamethasone | prazosin     | 8.993943928 |              |              |             |
| tretinoin     | naloxone     | 8.891602286 |              |              |             |
| dexamethasone | gatifloxacin | 8.625079393 |              |              |             |
| indinavir     | doxorubicin  | 8.575391732 |              |              |             |
| pirfenidone   | doxorubicin  | 8.488847728 |              |              |             |
| azelastine    | sirolimus    | 8.478058893 |              |              |             |
| tretinoin     | fluticasone  | 8.458202977 |              |              |             |
| salmeterol    | sirolimus    | 8.452229566 |              |              |             |
| capsaicin     | doxorubicin  | 8.402636334 |              |              |             |
| propranolol   | doxorubicin  | 8.399757203 |              |              |             |
| dexamethasone | telmisartan  | 8.388375821 |              |              |             |
| bosutinib     | capsaicin    | 8.36293697  |              |              |             |
| sirolimus     | olopatadine  | 8.261616588 |              |              |             |
| tretinoin     | gemfibrozil  | 8.08604987  |              |              |             |
| dexamethasone | clozapine    | 8.079957895 |              |              |             |
| naproxen      | bosutinib    | 8.052997456 |              |              |             |
| dexamethasone | cetirizine   | 8.025948637 |              |              |             |
| dexamethasone | dactinomycin | 7.881538066 |              |              |             |
| sirolimus     | fluoxetine   | 7.871656287 |              |              |             |
| sirolimus     | prazosin     | 7.830941125 |              |              |             |
| fludarabine   | bosutinib    | 7.787519248 |              |              |             |
| dexamethasone | naloxone     | 7.627947238 |              |              |             |
| bosutinib     | propranolol  | 7.615650375 |              |              |             |
| idarubicin    | doxorubicin  | 7.559168108 |              |              |             |
| sirolimus     | gatifloxacin | 7.508474077 |              |              |             |
| indinavir     | bosutinib    | 7.36642004  |              |              |             |
| bosutinib     | pirfenidone  | 7.360453414 |              |              |             |

|               |              |             |
|---------------|--------------|-------------|
| sirolimus     | telmisartan  | 7.343128699 |
| dexamethasone | fluticasone  | 7.257766656 |
| salmeterol    | doxorubicin  | 7.081872135 |
| azelastine    | doxorubicin  | 7.051194719 |
| sirolimus     | clozapine    | 7.041198403 |
| sirolimus     | cetirizine   | 6.994398587 |
| celecoxib     | capsaicin    | 6.978894256 |
| dexamethasone | gemfibrozil  | 6.943285452 |
| sirolimus     | dactinomycin | 6.861191829 |
| olopatadine   | doxorubicin  | 6.842995676 |
| sirolimus     | naloxone     | 6.638285109 |
| naproxen      | celecoxib    | 6.608181641 |
| fluoxetine    | doxorubicin  | 6.58007259  |
| bosutinib     | idarubicin   | 6.508289208 |
| prazosin      | doxorubicin  | 6.503225148 |
| fludarabine   | celecoxib    | 6.357663092 |
| sirolimus     | fluticasone  | 6.314736826 |
| propranolol   | celecoxib    | 6.27874045  |
| gatifloxacin  | doxorubicin  | 6.233626781 |
| telmisartan   | doxorubicin  | 6.152878874 |
| sirolimus     | gemfibrozil  | 6.036949858 |
| pirfenidone   | celecoxib    | 6.030421659 |
| indinavir     | celecoxib    | 6.027157936 |
| bosutinib     | olopatadine  | 5.998025026 |
| bosutinib     | azelastine   | 5.986610944 |
| clozapine     | doxorubicin  | 5.855787623 |
| cetirizine    | doxorubicin  | 5.817235643 |
| dactinomycin  | doxorubicin  | 5.696245162 |
| bosutinib     | salmeterol   | 5.664398218 |
| bosutinib     | prazosin     | 5.586553763 |
| naloxone      | doxorubicin  | 5.508206224 |
| bosutinib     | gatifloxacin | 5.367025223 |
| bosutinib     | fluoxetine   | 5.364799617 |
| idarubicin    | celecoxib    | 5.326806727 |
| doxorubicin   | fluticasone  | 5.237799662 |
| doxorubicin   | gemfibrozil  | 5.001598527 |
| bosutinib     | clozapine    | 4.974165148 |
| bosutinib     | cetirizine   | 4.938954029 |
| celecoxib     | olopatadine  | 4.921813336 |
| bosutinib     | telmisartan  | 4.919429698 |
| bosutinib     | dactinomycin | 4.904350635 |
| celecoxib     | azelastine   | 4.889808865 |
| bosutinib     | naloxone     | 4.762379105 |
| naproxen      | capsaicin    | 4.627850957 |
| salmeterol    | celecoxib    | 4.584652333 |
| celecoxib     | prazosin     | 4.570902124 |
| bosutinib     | fluticasone  | 4.541556362 |
| propranolol   | capsaicin    | 4.507723692 |
| celecoxib     | gatifloxacin | 4.392722135 |
| bosutinib     | gemfibrozil  | 4.375508524 |
| celecoxib     | fluoxetine   | 4.355182913 |
| fludarabine   | capsaicin    | 4.329684148 |
| pirfenidone   | capsaicin    | 4.187669319 |
| indinavir     | capsaicin    | 4.154732198 |
| celecoxib     | clozapine    | 4.063151312 |
| celecoxib     | cetirizine   | 4.034092313 |
| celecoxib     | dactinomycin | 4.014039193 |



|             |              |             |
|-------------|--------------|-------------|
| celecoxib   | telmisartan  | 3.981444078 |
| celecoxib   | naloxone     | 3.900208839 |
| celecoxib   | fluticasone  | 3.720898471 |
| idarubicin  | capsaicin    | 3.678608493 |
| celecoxib   | gemfibrozil  | 3.589429476 |
| capsaicin   | olopatadine  | 3.446529964 |
| azelastine  | capsaicin    | 3.33907892  |
| naproxen    | propranolol  | 3.219677222 |
| capsaicin   | prazosin     | 3.150957    |
| capsaicin   | gatifloxacin | 3.033544444 |
| salmeterol  | capsaicin    | 2.972287463 |
| fluoxetine  | capsaicin    | 2.873103878 |
| pirfenidone | propranolol  | 2.848087682 |
| fludarabine | propranolol  | 2.786737891 |
| capsaicin   | clozapine    | 2.775711403 |
| capsaicin   | dactinomycin | 2.772031992 |
| indinavir   | propranolol  | 2.768851839 |
| capsaicin   | cetirizine   | 2.754740109 |
| capsaicin   | naloxone     | 2.702342094 |
| naproxen    | pirfenidone  | 2.619006963 |
| capsaicin   | fluticasone  | 2.583881069 |
| capsaicin   | telmisartan  | 2.580285386 |
| naproxen    | indinavir    | 2.515193257 |
| capsaicin   | gemfibrozil  | 2.509794652 |
| fludarabine | naproxen     | 2.476583244 |
| propranolol | idarubicin   | 2.463966699 |
| propranolol | olopatadine  | 2.397221265 |
| naproxen    | idarubicin   | 2.245141339 |
| naproxen    | olopatadine  | 2.233372365 |
| indinavir   | pirfenidone  | 2.173388229 |
| propranolol | azelastine   | 2.166212258 |
| fludarabine | pirfenidone  | 2.120604297 |
| propranolol | prazosin     | 2.100039302 |
| propranolol | gatifloxacin | 2.031896709 |
| fludarabine | indinavir    | 1.999194607 |
| pirfenidone | olopatadine  | 1.94960752  |
| pirfenidone | idarubicin   | 1.942478882 |
| naproxen    | azelastine   | 1.934938777 |
| naproxen    | prazosin     | 1.907727574 |
| indinavir   | olopatadine  | 1.872230096 |
| propranolol | dactinomycin | 1.856733199 |
| naproxen    | gatifloxacin | 1.851443568 |
| indinavir   | idarubicin   | 1.849695226 |
| fludarabine | olopatadine  | 1.843314627 |
| propranolol | naloxone     | 1.826674661 |
| propranolol | clozapine    | 1.802855643 |
| fludarabine | idarubicin   | 1.792976748 |
| propranolol | cetirizine   | 1.787125113 |
| propranolol | fluticasone  | 1.757330697 |
| propranolol | gemfibrozil  | 1.738832638 |
| naproxen    | dactinomycin | 1.691836364 |
| propranolol | fluoxetine   | 1.673777915 |
| naproxen    | naloxone     | 1.673637679 |
| idarubicin  | olopatadine  | 1.671234081 |
| pirfenidone | azelastine   | 1.660367747 |
| pirfenidone | prazosin     | 1.648501671 |
| propranolol | salmeterol   | 1.629743284 |

|             |              |             |
|-------------|--------------|-------------|
| naproxen    | gemfibrozil  | 1.616338914 |
| naproxen    | fluticasone  | 1.615983019 |
| naproxen    | clozapine    | 1.611589033 |
| pirfenidone | gatifloxacin | 1.601854623 |
| naproxen    | cetirizine   | 1.596324491 |
| indinavir   | azelastine   | 1.568573399 |
| indinavir   | prazosin     | 1.567895772 |
| indinavir   | gatifloxacin | 1.525341087 |
| fludarabine | prazosin     | 1.51644493  |
| fludarabine | azelastine   | 1.497881688 |
| fludarabine | gatifloxacin | 1.478568503 |
| pirfenidone | dactinomycin | 1.463763707 |
| pirfenidone | naloxone     | 1.451261948 |
| azelastine  | olopatadine  | 1.440202114 |
| olopatadine | prazosin     | 1.420052149 |
| propranolol | telmisartan  | 1.412948432 |
| pirfenidone | gemfibrozil  | 1.409713959 |
| idarubicin  | azelastine   | 1.406023317 |
| pirfenidone | fluticasone  | 1.403331618 |
| idarubicin  | prazosin     | 1.402998841 |
| indinavir   | dactinomycin | 1.393846166 |
| naproxen    | fluoxetine   | 1.38652877  |
| indinavir   | naloxone     | 1.384892051 |
| pirfenidone | clozapine    | 1.383338753 |
| olopatadine | gatifloxacin | 1.378174076 |
| pirfenidone | cetirizine   | 1.369803391 |
| idarubicin  | gatifloxacin | 1.364506746 |
| indinavir   | gemfibrozil  | 1.352629768 |
| fludarabine | dactinomycin | 1.351105701 |
| fludarabine | naloxone     | 1.34776512  |
| indinavir   | fluticasone  | 1.34102678  |
| fludarabine | gemfibrozil  | 1.329703671 |
| fludarabine | fluticasone  | 1.30845797  |
| indinavir   | clozapine    | 1.307260796 |
| indinavir   | cetirizine   | 1.294073054 |
| naproxen    | salmeterol   | 1.285320573 |
| olopatadine | dactinomycin | 1.259365966 |
| fludarabine | clozapine    | 1.249076623 |
| idarubicin  | dactinomycin | 1.246876854 |
| olopatadine | naloxone     | 1.245848558 |
| idarubicin  | naloxone     | 1.238195118 |
| fludarabine | cetirizine   | 1.235752393 |
| idarubicin  | gemfibrozil  | 1.207672326 |
| olopatadine | gemfibrozil  | 1.203269103 |
| olopatadine | fluticasone  | 1.202949321 |
| olopatadine | clozapine    | 1.199532303 |
| idarubicin  | fluticasone  | 1.1985508   |
| azelastine  | prazosin     | 1.189798456 |
| olopatadine | cetirizine   | 1.188166744 |
| idarubicin  | clozapine    | 1.171698389 |
| idarubicin  | cetirizine   | 1.159969236 |
| azelastine  | gatifloxacin | 1.159469465 |
| prazosin    | gatifloxacin | 1.156975348 |
| pirfenidone | fluoxetine   | 1.150696854 |
| naproxen    | telmisartan  | 1.113089103 |
| azelastine  | dactinomycin | 1.059515201 |
| prazosin    | dactinomycin | 1.057236094 |

|              |              |             |
|--------------|--------------|-------------|
| azelastine   | naloxone     | 1.055903373 |
| indinavir    | fluoxetine   | 1.051236478 |
| prazosin     | naloxone     | 1.050436981 |
| pirfenidone  | salmeterol   | 1.041573486 |
| azelastine   | gemfibrozil  | 1.03928463  |
| fluoxetine   | olopatadine  | 1.031659879 |
| gatifloxacin | dactinomycin | 1.028230202 |
| prazosin     | gemfibrozil  | 1.02594766  |
| azelastine   | fluticasone  | 1.024482227 |
| gatifloxacin | naloxone     | 1.021070856 |
| prazosin     | fluticasone  | 1.017160605 |
| gatifloxacin | gemfibrozil  | 0.995900401 |
| prazosin     | clozapine    | 0.991585915 |
| gatifloxacin | fluticasone  | 0.988378384 |
| azelastine   | clozapine    | 0.982869135 |
| prazosin     | cetirizine   | 0.981583726 |
| azelastine   | cetirizine   | 0.972521006 |
| gatifloxacin | clozapine    | 0.96623469  |
| gatifloxacin | cetirizine   | 0.956562309 |
| salmeterol   | olopatadine  | 0.956128004 |
| idarubicin   | fluoxetine   | 0.950523293 |
| fludarabine  | fluoxetine   | 0.938484156 |
| dactinomycin | naloxone     | 0.933047506 |
| indinavir    | salmeterol   | 0.92771481  |
| dactinomycin | gemfibrozil  | 0.910046918 |
| dactinomycin | fluticasone  | 0.903173351 |
| pirfenidone  | telmisartan  | 0.901492879 |
| naloxone     | gemfibrozil  | 0.900618892 |
| naloxone     | fluticasone  | 0.8954595   |
| clozapine    | dactinomycin | 0.882938596 |
| clozapine    | naloxone     | 0.879807157 |
| cetirizine   | dactinomycin | 0.874100041 |
| cetirizine   | naloxone     | 0.871120283 |
| fluticasone  | gemfibrozil  | 0.869823507 |
| clozapine    | gemfibrozil  | 0.865657276 |
| cetirizine   | gemfibrozil  | 0.85740982  |
| clozapine    | fluticasone  | 0.853549443 |
| cetirizine   | fluticasone  | 0.845197837 |
| salmeterol   | idarubicin   | 0.844490818 |
| olopatadine  | telmisartan  | 0.828003342 |
| clozapine    | cetirizine   | 0.810867037 |
| indinavir    | telmisartan  | 0.80245075  |
| fluoxetine   | prazosin     | 0.7974772   |
| fluoxetine   | gatifloxacin | 0.783843853 |
| fludarabine  | salmeterol   | 0.783264297 |
| azelastine   | fluoxetine   | 0.750907519 |
| fluoxetine   | gemfibrozil  | 0.740374205 |
| idarubicin   | telmisartan  | 0.73058481  |
| fluoxetine   | naloxone     | 0.72470264  |
| fluoxetine   | dactinomycin | 0.716271107 |
| fluoxetine   | fluticasone  | 0.710004442 |
| salmeterol   | prazosin     | 0.703834814 |
| salmeterol   | gatifloxacin | 0.696404751 |
| salmeterol   | gemfibrozil  | 0.683533531 |
| fludarabine  | telmisartan  | 0.676544562 |
| salmeterol   | naloxone     | 0.651271671 |
| salmeterol   | fluticasone  | 0.642673002 |

|             |              |             |
|-------------|--------------|-------------|
| salmeterol  | dactinomycin | 0.636369858 |
| salmeterol  | azelastine   | 0.635781336 |
| fluoxetine  | clozapine    | 0.627595952 |
| fluoxetine  | cetirizine   | 0.619498703 |
| telmisartan | prazosin     | 0.608801326 |
| telmisartan | gatifloxacin | 0.602472782 |
| telmisartan | gemfibrozil  | 0.591883939 |
| telmisartan | naloxone     | 0.563584536 |
| telmisartan | fluticasone  | 0.556240287 |
| telmisartan | dactinomycin | 0.550535473 |
| azelastine  | telmisartan  | 0.549360981 |
| salmeterol  | clozapine    | 0.532464356 |
| salmeterol  | cetirizine   | 0.524519602 |
| telmisartan | clozapine    | 0.460111892 |
| telmisartan | cetirizine   | 0.453222809 |
| salmeterol  | fluoxetine   | 0.19356083  |
| fluoxetine  | telmisartan  | 0.165081952 |
| salmeterol  | telmisartan  | 0.006055737 |

| BRAF_PrimaryMelanoma_TCGASKCM |              |             | NRAS_PrimaryMelanoma_TCGASKCM |                 |             |
|-------------------------------|--------------|-------------|-------------------------------|-----------------|-------------|
| drug1                         | drug2        | score       | drug1                         | drug2           | score       |
| etoposide                     | tretinoin    | 26.47989847 | tretinoin                     | estradiol       | 24.29600728 |
| chloroquine                   | tretinoin    | 21.45722009 | chloroquine                   | tretinoin       | 21.23708644 |
| tretinoin                     | estradiol    | 21.25679196 | tretinoin                     | doxorubicin     | 20.73788428 |
| capsaicin                     | tretinoin    | 21.08266574 | levofloxacin                  | tretinoin       | 20.71673762 |
| diazoxide                     | tretinoin    | 20.63916133 | tretinoin                     | bosutinib       | 20.38013371 |
| pirfenidone                   | tretinoin    | 20.57552872 | tretinoin                     | pirfenidone     | 19.97041109 |
| levofloxacin                  | tretinoin    | 20.4623552  | diazoxide                     | tretinoin       | 19.54477548 |
| teniposide                    | tretinoin    | 20.45605773 | tretinoin                     | olopatadine     | 19.23532311 |
| olopatadine                   | tretinoin    | 20.23958374 | tretinoin                     | celecoxib       | 18.72191984 |
| fludarabine                   | tretinoin    | 20.12901111 | tretinoin                     | prazosin        | 18.6593205  |
| mifepristone                  | tretinoin    | 20.00676871 | tretinoin                     | omeprazole      | 17.18699304 |
| nifedipine                    | tretinoin    | 19.44956479 | tretinoin                     | fluoxetine      | 16.68956719 |
| prazosin                      | tretinoin    | 19.1982856  | tretinoin                     | chloramphenicol | 16.68055458 |
| etoposide                     | estradiol    | 18.72443467 | tretinoin                     | calcitriol      | 16.67005075 |
| chloramphenicol               | tretinoin    | 18.55603268 | tretinoin                     | capsaicin       | 16.22835269 |
| fluoxetine                    | tretinoin    | 18.17473385 | tretinoin                     | etoposide       | 16.22565637 |
| tretinoin                     | bosutinib    | 17.93788711 | tretinoin                     | clozapine       | 15.26135589 |
| gatifloxacin                  | tretinoin    | 17.43684715 | tretinoin                     | azelastine      | 13.92007922 |
| latanoprost                   | tretinoin    | 17.24154341 | tretinoin                     | latanoprost     | 13.81776406 |
| tretinoin                     | panobinostat | 16.18040251 | tretinoin                     | cetirizine      | 13.78937425 |
| tretinoin                     | miglitol     | 15.50504381 | tretinoin                     | vinblastine     | 13.66108805 |
| etoposide                     | capsaicin    | 15.31216757 | estradiol                     | doxorubicin     | 13.58568754 |
| chloroquine                   | estradiol    | 14.94181104 | tretinoin                     | palbociclib     | 13.47982065 |
| tretinoin                     | calcitriol   | 14.86455511 | tretinoin                     | panobinostat    | 13.28717056 |
| capsaicin                     | estradiol    | 14.78020742 | bosutinib                     | estradiol       | 12.87928226 |
| diazoxide                     | estradiol    | 14.40439307 | chloroquine                   | estradiol       | 12.56689857 |
| pirfenidone                   | estradiol    | 14.33844192 | levofloxacin                  | estradiol       | 12.05530175 |
| chloroquine                   | etoposide    | 14.33190228 | tretinoin                     | formoterol      | 11.95950468 |
| teniposide                    | estradiol    | 14.20955931 | pirfenidone                   | estradiol       | 11.78817193 |
| levofloxacin                  | estradiol    | 14.20330585 | tretinoin                     | eplerenone      | 11.77725503 |
| diazoxide                     | etoposide    | 14.18531701 | olopatadine                   | estradiol       | 11.72665457 |
| olopatadine                   | estradiol    | 14.1235846  | celecoxib                     | estradiol       | 11.52815102 |
| fludarabine                   | estradiol    | 14.04755688 | tretinoin                     | lamivudine      | 11.23164327 |
| tretinoin                     | omeprazole   | 14.00436944 | diazoxide                     | estradiol       | 11.17719362 |
| olopatadine                   | etoposide    | 13.88666518 | bosutinib                     | doxorubicin     | 11.00894825 |

|                 |               |             |                 |              |             |
|-----------------|---------------|-------------|-----------------|--------------|-------------|
| mifepristone    | estradiol     | 13.88122766 | tretinoin       | bepiridil    | 10.92216411 |
| pirfenidone     | etoposide     | 13.87444611 | prazosin        | estradiol    | 10.87675569 |
| tretinoin       | azelastine    | 13.8328071  | chloroquine     | doxorubicin  | 10.76048694 |
| etoposide       | fludarabine   | 13.82483878 | estradiol       | calcitriol   | 10.60007311 |
| tretinoin       | decitabine    | 13.81958931 | levofloxacin    | doxorubicin  | 10.32715618 |
| etoposide       | bosutinib     | 13.62531672 | estradiol       | etoposide    | 10.18391093 |
| nifedipine      | estradiol     | 13.45431581 | pirfenidone     | doxorubicin  | 10.09437454 |
| tretinoin       | amitriptyline | 13.40445115 | olopatadine     | doxorubicin  | 10.03303217 |
| tretinoin       | irbesartan    | 13.40234997 | celecoxib       | doxorubicin  | 9.860618362 |
| tretinoin       | vinblastine   | 13.40104673 | omeprazole      | estradiol    | 9.828833754 |
| prazosin        | estradiol     | 13.32090777 | fluoxetine      | estradiol    | 9.716495538 |
| teniposide      | etoposide     | 13.22804984 | chloramphenicol | estradiol    | 9.684933926 |
| levofloxacin    | etoposide     | 13.10032203 | diazoxide       | doxorubicin  | 9.57955504  |
| tretinoin       | lamivudine    | 13.06188294 | capsaicin       | estradiol    | 9.459713579 |
| tretinoin       | clozapine     | 12.90096253 | prazosin        | doxorubicin  | 9.31711541  |
| chloramphenicol | estradiol     | 12.87217959 | doxorubicin     | calcitriol   | 9.059305643 |
| tretinoin       | nilotinib     | 12.76428583 | doxorubicin     | etoposide    | 8.706519613 |
| tretinoin       | pimozide      | 12.74463567 | clozapine       | estradiol    | 8.690245227 |
| mifepristone    | etoposide     | 12.73613752 | chloroquine     | bosutinib    | 8.436509854 |
| bosutinib       | estradiol     | 12.62368412 | omeprazole      | doxorubicin  | 8.423926178 |
| fluoxetine      | estradiol     | 12.61028653 | celecoxib       | bosutinib    | 8.385225834 |
| tretinoin       | azacitidine   | 12.36576033 | olopatadine     | bosutinib    | 8.367171095 |
| prazosin        | etoposide     | 12.22924187 | fluoxetine      | doxorubicin  | 8.323511613 |
| gatifloxacin    | estradiol     | 12.13466614 | chloramphenicol | doxorubicin  | 8.297095515 |
| tretinoin       | formoterol    | 11.98418311 | bosutinib       | calcitriol   | 8.173310701 |
| latanoprost     | estradiol     | 11.96352388 | capsaicin       | doxorubicin  | 8.103265867 |
| nifedipine      | etoposide     | 11.88154223 | estradiol       | azelastine   | 8.100250074 |
| chloramphenicol | etoposide     | 11.78174617 | estradiol       | vinblastine  | 8.060783401 |
| etoposide       | calcitriol    | 11.75186913 | estradiol       | cetirizine   | 8.024191388 |
| tretinoin       | icosapent     | 11.66406895 | estradiol       | latanoprost  | 7.87372295  |
| etoposide       | fluoxetine    | 11.57202928 | pirfenidone     | bosutinib    | 7.871796666 |
| etoposide       | gatifloxacin  | 11.55302259 | estradiol       | palbociclib  | 7.859609851 |
| etoposide       | panobinostat  | 11.53521457 | levofloxacin    | bosutinib    | 7.800365421 |
| tretinoin       | vemurafenib   | 11.48785724 | estradiol       | panobinostat | 7.723526942 |
| panobinostat    | estradiol     | 11.32597204 | bosutinib       | etoposide    | 7.673787406 |
| tretinoin       | fluvastatin   | 11.10007746 | clozapine       | doxorubicin  | 7.448981754 |
| tretinoin       | epplerenone   | 11.01316544 | chloroquine     | calcitriol   | 7.196903449 |
| etoposide       | latanoprost   | 10.98676906 | prazosin        | bosutinib    | 7.065097446 |
| tretinoin       | estrone       | 10.78156198 | olopatadine     | calcitriol   | 7.050761542 |
| miglitol        | estradiol     | 10.76025372 | celecoxib       | calcitriol   | 7.039557251 |
| tretinoin       | mebendazole   | 10.68199377 | estradiol       | formoterol   | 6.959369782 |
| estradiol       | calcitriol    | 10.49801831 | diazoxide       | bosutinib    | 6.945584549 |
| etoposide       | decitabine    | 10.46166879 | azelastine      | doxorubicin  | 6.939067088 |
| etoposide       | miglitol      | 9.900666917 | estradiol       | epplerenone  | 6.905156418 |
| estradiol       | decitabine    | 9.722596663 | vinblastine     | doxorubicin  | 6.902632568 |
| omeprazole      | estradiol     | 9.719855826 | cetirizine      | doxorubicin  | 6.873911528 |
| azelastine      | estradiol     | 9.601611744 | latanoprost     | doxorubicin  | 6.748954074 |
| amitriptyline   | estradiol     | 9.329555828 | palbociclib     | doxorubicin  | 6.732555977 |
| vinblastine     | estradiol     | 9.310706766 | olopatadine     | celecoxib    | 6.72747942  |
| irbesartan      | estradiol     | 9.308943622 | pirfenidone     | calcitriol   | 6.722538622 |
| capsaicin       | bosutinib     | 9.266429011 | levofloxacin    | calcitriol   | 6.705695239 |
| lamivudine      | estradiol     | 9.068966871 | panobinostat    | doxorubicin  | 6.616546655 |
| clozapine       | estradiol     | 8.980351602 | estradiol       | lamivudine   | 6.534126833 |
| etoposide       | omeprazole    | 8.955393743 | celecoxib       | etoposide    | 6.482509702 |
| etoposide       | amitriptyline | 8.895171538 | olopatadine     | etoposide    | 6.440355988 |
| nilotinib       | estradiol     | 8.860578484 | chloroquine     | etoposide    | 6.399911975 |
| etoposide       | azelastine    | 8.855980938 | etoposide       | calcitriol   | 6.399071244 |

|              |              |             |                 |              |             |
|--------------|--------------|-------------|-----------------|--------------|-------------|
| pimozide     | estradiol    | 8.816141763 | estradiol       | bepriidil    | 6.381912366 |
| etoposide    | vinblastine  | 8.68854408  | chloroquine     | celecoxib    | 6.376489993 |
| etoposide    | azacitidine  | 8.65930794  | fluoxetine      | bosutinib    | 6.293838346 |
| etoposide    | irbesartan   | 8.656294896 | chloramphenicol | bosutinib    | 6.234959691 |
| estradiol    | azacitidine  | 8.643183982 | capsaicin       | bosutinib    | 6.144644609 |
| etoposide    | clozapine    | 8.576261665 | omeprazole      | bosutinib    | 6.107704509 |
| diazoxide    | capsaicin    | 8.463401205 | prazosin        | calcitriol   | 6.068629754 |
| etoposide    | lamivudine   | 8.393030782 | diazoxide       | calcitriol   | 6.023155559 |
| capsaicin    | calcitriol   | 8.358155399 | chloroquine     | olopatadine  | 6.018490633 |
| formoterol   | estradiol    | 8.318447041 | pirfenidone     | etoposide    | 5.963636125 |
| diazoxide    | bosutinib    | 8.268003227 | doxorubicin     | formoterol   | 5.961733695 |
| olopatadine  | capsaicin    | 8.264148548 | pirfenidone     | celecoxib    | 5.915477647 |
| fludarabine  | capsaicin    | 8.239688694 | doxorubicin     | eplerenone   | 5.914068427 |
| chloroquine  | capsaicin    | 8.186307529 | levofloxacin    | etoposide    | 5.862288438 |
| chloroquine  | bosutinib    | 8.180690936 | levofloxacin    | celecoxib    | 5.657023559 |
| etoposide    | nilotinib    | 8.179926213 | doxorubicin     | lamivudine   | 5.597489899 |
| icosapent    | estradiol    | 8.093467142 | pirfenidone     | olopatadine  | 5.567240517 |
| olopatadine  | bosutinib    | 8.083948702 | doxorubicin     | bepriidil    | 5.466437727 |
| fludarabine  | bosutinib    | 8.053801923 | fluoxetine      | calcitriol   | 5.409348337 |
| pirfenidone  | capsaicin    | 8.043640663 | bosutinib       | vinblastine  | 5.378276224 |
| pirfenidone  | bosutinib    | 7.975788916 | chloramphenicol | calcitriol   | 5.365748131 |
| estradiol    | vemurafenib  | 7.974520636 | clozapine       | bosutinib    | 5.344622781 |
| etoposide    | pimozide     | 7.785420464 | prazosin        | etoposide    | 5.315033511 |
| estradiol    | fluvastatin  | 7.732362947 | omeprazole      | calcitriol   | 5.296552666 |
| chloroquine  | calcitriol   | 7.71740059  | capsaicin       | calcitriol   | 5.277998412 |
| diazoxide    | calcitriol   | 7.675154999 | bosutinib       | azelastine   | 5.241254999 |
| etoposide    | formoterol   | 7.672462748 | levofloxacin    | olopatadine  | 5.226892204 |
| estradiol    | eplerenone   | 7.641088273 | bosutinib       | cetirizine   | 5.192041337 |
| olopatadine  | calcitriol   | 7.511423348 | diazoxide       | etoposide    | 5.163963372 |
| estradiol    | estrone      | 7.503114175 | prazosin        | celecoxib    | 5.146890612 |
| bosutinib    | calcitriol   | 7.487780098 | bosutinib       | palbociclib  | 5.108273795 |
| pirfenidone  | calcitriol   | 7.483132805 | bosutinib       | panobinostat | 4.985183339 |
| fludarabine  | calcitriol   | 7.479234955 | bosutinib       | latanoprost  | 4.850662646 |
| etoposide    | fluvastatin  | 7.448599947 | diazoxide       | celecoxib    | 4.794658785 |
| etoposide    | icosapent    | 7.433012317 | prazosin        | olopatadine  | 4.766899304 |
| estradiol    | mebendazole  | 7.421577857 | fluoxetine      | etoposide    | 4.731398415 |
| teniposide   | bosutinib    | 7.36451759  | chloramphenicol | etoposide    | 4.679644917 |
| etoposide    | vemurafenib  | 7.361933591 | clozapine       | calcitriol   | 4.645367388 |
| capsaicin    | panobinostat | 7.245713424 | capsaicin       | etoposide    | 4.622581962 |
| levofloxacin | bosutinib    | 7.235188404 | vinblastine     | calcitriol   | 4.593856282 |
| teniposide   | capsaicin    | 7.163089149 | fluoxetine      | celecoxib    | 4.570199337 |
| etoposide    | estrone      | 7.143471986 | bosutinib       | eplerenone   | 4.543724079 |
| capsaicin    | decitabine   | 7.086728025 | omeprazole      | etoposide    | 4.54100906  |
| teniposide   | calcitriol   | 7.08307258  | azelastine      | calcitriol   | 4.505719514 |
| etoposide    | eplerenone   | 7.009169116 | bosutinib       | formoterol   | 4.503050069 |
| levofloxacin | calcitriol   | 7.002187906 | chloroquine     | pirfenidone  | 4.497075257 |
| mifepristone | bosutinib    | 7.001700921 | chloramphenicol | celecoxib    | 4.494965907 |
| levofloxacin | capsaicin    | 6.971066194 | capsaicin       | celecoxib    | 4.476345004 |
| etoposide    | mebendazole  | 6.925651078 | cetirizine      | calcitriol   | 4.463412288 |
| panobinostat | bosutinib    | 6.895600683 | palbociclib     | calcitriol   | 4.387254659 |
| mifepristone | calcitriol   | 6.800587889 | diazoxide       | olopatadine  | 4.31095702  |
| prazosin     | bosutinib    | 6.726524582 | panobinostat    | calcitriol   | 4.287830218 |
| mifepristone | capsaicin    | 6.709001935 | fluoxetine      | olopatadine  | 4.225528868 |
| diazoxide    | olopatadine  | 6.671961886 | bosutinib       | lamivudine   | 4.225424402 |
| diazoxide    | fludarabine  | 6.660596771 | omeprazole      | celecoxib    | 4.216255503 |
| gatifloxacin | bosutinib    | 6.554489296 | latanoprost     | calcitriol   | 4.214457508 |
| prazosin     | calcitriol   | 6.530674709 | bosutinib       | bepriidil    | 4.16766748  |

|                 |               |             |                 |                 |             |
|-----------------|---------------|-------------|-----------------|-----------------|-------------|
| capsaicin       | gatifloxacin  | 6.514595705 | olopatadine     | capsaicin       | 4.145859606 |
| bosutinib       | decitabine    | 6.498058951 | chloramphenicol | olopatadine     | 4.140029374 |
| olopatadine     | fludarabine   | 6.489684031 | vinblastine     | etoposide       | 4.073709868 |
| chloramphenicol | bosutinib     | 6.463174248 | celecoxib       | vinblastine     | 4.037981506 |
| prazosin        | capsaicin     | 6.44934972  | clozapine       | etoposide       | 3.962379047 |
| chloroquine     | diazoxide     | 6.376141892 | azelastine      | etoposide       | 3.939013998 |
| fluoxetine      | bosutinib     | 6.362696037 | cetirizine      | etoposide       | 3.902027951 |
| pirfenidone     | diazoxide     | 6.349019846 | calcitriol      | eplerenone      | 3.892257556 |
| nifedipine      | bosutinib     | 6.307586791 | levofloxacin    | chloroquine     | 3.879570337 |
| diazoxide       | decitabine    | 6.306423608 | formoterol      | calcitriol      | 3.871111131 |
| nifedipine      | calcitriol    | 6.29614116  | palbociclib     | etoposide       | 3.843507397 |
| chloramphenicol | calcitriol    | 6.288009502 | celecoxib       | azelastine      | 3.80109154  |
| panobinostat    | calcitriol    | 6.278235664 | olopatadine     | vinblastine     | 3.798529102 |
| chloroquine     | decitabine    | 6.23034264  | omeprazole      | olopatadine     | 3.790905062 |
| gatifloxacin    | calcitriol    | 6.212453038 | celecoxib       | cetirizine      | 3.765400539 |
| chloroquine     | olopatadine   | 6.203805076 | panobinostat    | etoposide       | 3.744163188 |
| chloroquine     | fludarabine   | 6.198487483 | celecoxib       | palbociclib     | 3.723874522 |
| pirfenidone     | olopatadine   | 6.180567592 | clozapine       | celecoxib       | 3.640549803 |
| fluoxetine      | calcitriol    | 6.179207607 | calcitriol      | lamivudine      | 3.632897392 |
| chloramphenicol | capsaicin     | 6.177032295 | celecoxib       | panobinostat    | 3.60496504  |
| pirfenidone     | fludarabine   | 6.173413569 | latanoprost     | etoposide       | 3.597854414 |
| olopatadine     | decitabine    | 6.165487869 | chloroquine     | prazosin        | 3.578940484 |
| fludarabine     | decitabine    | 6.142816694 | calcitriol      | bepidil         | 3.575814866 |
| diazoxide       | panobinostat  | 6.108635509 | olopatadine     | azelastine      | 3.512075834 |
| fluoxetine      | capsaicin     | 6.097821145 | levofloxacin    | pirfenidone     | 3.502988013 |
| pirfenidone     | decitabine    | 6.07744227  | olopatadine     | cetirizine      | 3.479098596 |
| latanoprost     | bosutinib     | 6.044897757 | olopatadine     | palbociclib     | 3.45017664  |
| olopatadine     | panobinostat  | 5.960978974 | etoposide       | eplerenone      | 3.429572581 |
| fludarabine     | panobinostat  | 5.945590818 | etoposide       | formoterol      | 3.384223294 |
| latanoprost     | calcitriol    | 5.867549374 | celecoxib       | eplerenone      | 3.359308598 |
| chloroquine     | panobinostat  | 5.842159773 | olopatadine     | panobinostat    | 3.325743087 |
| chloroquine     | pirfenidone   | 5.812756938 | celecoxib       | latanoprost     | 3.311392711 |
| capsaicin       | latanoprost   | 5.79785761  | celecoxib       | formoterol      | 3.265726534 |
| nifedipine      | capsaicin     | 5.78549348  | olopatadine     | clozapine       | 3.248015411 |
| pirfenidone     | panobinostat  | 5.762941578 | pirfenidone     | prazosin        | 3.23619777  |
| decitabine      | calcitriol    | 5.746339288 | etoposide       | lamivudine      | 3.175093927 |
| teniposide      | decitabine    | 5.598320595 | chloroquine     | fluoxetine      | 3.146474322 |
| levofloxacin    | decitabine    | 5.496661826 | etoposide       | bepidil         | 3.139635287 |
| miglitol        | bosutinib     | 5.456489619 | olopatadine     | eplerenone      | 3.135374132 |
| mifepristone    | decitabine    | 5.317404207 | chloroquine     | capsaicin       | 3.112670069 |
| capsaicin       | azacitidine   | 5.307006646 | celecoxib       | lamivudine      | 3.062293396 |
| teniposide      | diazoxide     | 5.301116974 | chloroquine     | vinblastine     | 3.062212457 |
| miglitol        | calcitriol    | 5.289476135 | celecoxib       | bepidil         | 3.05486555  |
| panobinostat    | decitabine    | 5.269077601 | chloroquine     | chloramphenicol | 3.0255693   |
| capsaicin       | miglitol      | 5.244044223 | olopatadine     | formoterol      | 3.017417266 |
| teniposide      | fludarabine   | 5.149136873 | olopatadine     | latanoprost     | 2.95817308  |
| teniposide      | olopatadine   | 5.147403845 | pirfenidone     | fluoxetine      | 2.842211073 |
| bosutinib       | azacitidine   | 5.11375698  | olopatadine     | bepidil         | 2.838493882 |
| prazosin        | decitabine    | 5.108626136 | olopatadine     | lamivudine      | 2.828424195 |
| levofloxacin    | diazoxide     | 5.067247619 | pirfenidone     | capsaicin       | 2.814580455 |
| bosutinib       | amitriptyline | 5.052563488 | pirfenidone     | vinblastine     | 2.79269724  |
| teniposide      | panobinostat  | 5.037139424 | diazoxide       | chloroquine     | 2.771623245 |
| capsaicin       | amitriptyline | 5.02848583  | pirfenidone     | chloramphenicol | 2.726482439 |
| diazoxide       | gatifloxacin  | 5.01429831  | chloroquine     | azelastine      | 2.606777545 |
| gatifloxacin    | decitabine    | 4.989598939 | chloroquine     | palbociclib     | 2.594778795 |
| omeprazole      | bosutinib     | 4.941331451 | levofloxacin    | prazosin        | 2.588860113 |
| levofloxacin    | fludarabine   | 4.920486476 | chloroquine     | cetirizine      | 2.582300761 |

|                 |                 |             |                 |                 |             |
|-----------------|-----------------|-------------|-----------------|-----------------|-------------|
| levofloxacin    | olopatadine     | 4.916692526 | diazoxide       | pirfenidone     | 2.453701006 |
| chloramphenicol | decitabine      | 4.907616944 | chloroquine     | panobinostat    | 2.450082077 |
| bosutinib       | azelastine      | 4.891077519 | chloroquine     | eplerenone      | 2.440332241 |
| bosutinib       | clozapine       | 4.877963471 | chloroquine     | omeprazole      | 2.437268695 |
| levofloxacin    | panobinostat    | 4.877423163 | levofloxacin    | vinblastine     | 2.380805508 |
| olopatadine     | gatifloxacin    | 4.876526966 | pirfenidone     | azelastine      | 2.353742734 |
| fludarabine     | gatifloxacin    | 4.873668236 | pirfenidone     | palbociclib     | 2.346784866 |
| capsaicin       | clozapine       | 4.862015344 | pirfenidone     | cetirizine      | 2.331641863 |
| bosutinib       | vinblastine     | 4.847227862 | levofloxacin    | fluoxetine      | 2.255535594 |
| fluoxetine      | decitabine      | 4.83217151  | levofloxacin    | capsaicin       | 2.251579042 |
| mifepristone    | diazoxide       | 4.824864381 | chloroquine     | formoterol      | 2.239625778 |
| bosutinib       | irbesartan      | 4.814656268 | pirfenidone     | eplerenone      | 2.2163752   |
| omeprazole      | calcitriol      | 4.785705009 | pirfenidone     | panobinostat    | 2.210157057 |
| amitriptyline   | calcitriol      | 4.784519012 | prazosin        | vinblastine     | 2.199998473 |
| nifedipine      | decitabine      | 4.777208077 | chloroquine     | bepidil         | 2.163974165 |
| capsaicin       | omeprazole      | 4.755613507 | pirfenidone     | omeprazole      | 2.15769898  |
| azelastine      | calcitriol      | 4.733566279 | levofloxacin    | chloramphenicol | 2.123388761 |
| capsaicin       | vinblastine     | 4.726039969 | prazosin        | fluoxetine      | 2.106204471 |
| teniposide      | pirfenidone     | 4.716703726 | prazosin        | capsaicin       | 2.099978317 |
| capsaicin       | azelastine      | 4.712527614 | chloroquine     | lamivudine      | 2.095655157 |
| azacitidine     | calcitriol      | 4.699529229 | pirfenidone     | formoterol      | 2.022229673 |
| mifepristone    | fludarabine     | 4.68426781  | chloroquine     | clozapine       | 1.994943661 |
| mifepristone    | panobinostat    | 4.680106913 | prazosin        | chloramphenicol | 1.988484619 |
| mifepristone    | olopatadine     | 4.679424793 | pirfenidone     | bepidil         | 1.960447546 |
| capsaicin       | irbesartan      | 4.67773017  | fluoxetine      | vinblastine     | 1.931837123 |
| vinblastine     | calcitriol      | 4.654503522 | capsaicin       | vinblastine     | 1.913378954 |
| bosutinib       | lamivudine      | 4.649050374 | pirfenidone     | lamivudine      | 1.891812204 |
| prazosin        | diazoxide       | 4.643786676 | levofloxacin    | palbociclib     | 1.880440891 |
| irbesartan      | calcitriol      | 4.634099039 | levofloxacin    | azelastine      | 1.861954766 |
| gatifloxacin    | panobinostat    | 4.63306045  | chloramphenicol | vinblastine     | 1.852454208 |
| chloroquine     | teniposide      | 4.627309891 | levofloxacin    | cetirizine      | 1.844471622 |
| clozapine       | calcitriol      | 4.614388583 | levofloxacin    | eplerenone      | 1.833259929 |
| latanoprost     | decitabine      | 4.591051152 | fluoxetine      | capsaicin       | 1.831804593 |
| pirfenidone     | gatifloxacin    | 4.546300444 | chloroquine     | latanoprost     | 1.831152226 |
| bosutinib       | nilotinib       | 4.521281092 | pirfenidone     | clozapine       | 1.753813364 |
| chloroquine     | gatifloxacin    | 4.508890714 | prazosin        | palbociclib     | 1.753398213 |
| prazosin        | fludarabine     | 4.508560939 | prazosin        | azelastine      | 1.739517994 |
| prazosin        | olopatadine     | 4.504035217 | levofloxacin    | panobinostat    | 1.735370458 |
| prazosin        | panobinostat    | 4.500498218 | chloramphenicol | fluoxetine      | 1.729520134 |
| capsaicin       | lamivudine      | 4.494996165 | chloramphenicol | capsaicin       | 1.729421482 |
| lamivudine      | calcitriol      | 4.489047207 | prazosin        | cetirizine      | 1.723184492 |
| levofloxacin    | pirfenidone     | 4.468323384 | prazosin        | eplerenone      | 1.701408459 |
| diazoxide       | chloramphenicol | 4.419852376 | diazoxide       | vinblastine     | 1.662232505 |
| diazoxide       | azacitidine     | 4.389026184 | levofloxacin    | diazoxide       | 1.638464922 |
| diazoxide       | fluoxetine      | 4.386888586 | prazosin        | panobinostat    | 1.623094564 |
| nilotinib       | calcitriol      | 4.372980301 | pirfenidone     | latanoprost     | 1.611783317 |
| levofloxacin    | chloroquine     | 4.360469594 | azelastine      | vinblastine     | 1.599721051 |
| capsaicin       | nilotinib       | 4.360338955 | levofloxacin    | formoterol      | 1.599707616 |
| chloramphenicol | panobinostat    | 4.302975953 | palbociclib     | vinblastine     | 1.595422299 |
| chloramphenicol | fludarabine     | 4.290683923 | levofloxacin    | bepidil         | 1.59122525  |
| capsaicin       | fluvastatin     | 4.285767719 | cetirizine      | vinblastine     | 1.584700196 |
| chloramphenicol | olopatadine     | 4.285709578 | diazoxide       | prazosin        | 1.573482561 |
| olopatadine     | azacitidine     | 4.279984318 | fluoxetine      | palbociclib     | 1.529752571 |
| fludarabine     | azacitidine     | 4.270668973 | capsaicin       | palbociclib     | 1.52496253  |
| bosutinib       | fluvastatin     | 4.266451114 | fluoxetine      | azelastine      | 1.515549153 |
| fludarabine     | fluoxetine      | 4.259080673 | capsaicin       | azelastine      | 1.51289065  |
| olopatadine     | fluoxetine      | 4.254714736 | vinblastine     | eplerenone      | 1.507793162 |



|               |                 |             |                 |                 |             |
|---------------|-----------------|-------------|-----------------|-----------------|-------------|
| fluoxetine    | panobinostat    | 4.25417602  | panobinostat    | vinblastine     | 1.501899971 |
| bosutinib     | formoterol      | 4.237431215 | fluoxetine      | cetirizine      | 1.501318645 |
| mifepristone  | pirfenidone     | 4.231390611 | capsaicin       | cetirizine      | 1.498685104 |
| diazoxide     | latanoprost     | 4.17756424  | prazosin        | formoterol      | 1.494515446 |
| chloroquine   | azacitidine     | 4.146495349 | levofloxacin    | lamivudine      | 1.493928856 |
| miglitol      | decitabine      | 4.144692792 | fluoxetine      | eplerenone      | 1.489381104 |
| bosutinib     | pimozide        | 4.132998028 | prazosin        | bepidil         | 1.48088278  |
| pimozide      | calcitriol      | 4.125552757 | capsaicin       | eplerenone      | 1.479746089 |
| chloroquine   | mifepristone    | 4.115797395 | omeprazole      | vinblastine     | 1.461709219 |
| pirfenidone   | azacitidine     | 4.107826121 | chloramphenicol | palbociclib     | 1.444852686 |
| formoterol    | calcitriol      | 4.100969864 | levofloxacin    | omeprazole      | 1.440808836 |
| bosutinib     | icosapent       | 4.089788583 | chloramphenicol | azelastine      | 1.426756486 |
| capsaicin     | formoterol      | 4.082742818 | chloramphenicol | eplerenone      | 1.417872095 |
| prazosin      | pirfenidone     | 4.075141169 | chloramphenicol | cetirizine      | 1.413359712 |
| bosutinib     | vemurafenib     | 4.069152983 | fluoxetine      | panobinostat    | 1.412972144 |
| fludarabine   | latanoprost     | 4.055962661 | capsaicin       | panobinostat    | 1.411635061 |
| bosutinib     | estrone         | 4.052775824 | prazosin        | lamivudine      | 1.39606133  |
| olopatadine   | latanoprost     | 4.051960201 | prazosin        | omeprazole      | 1.383665617 |
| latanoprost   | panobinostat    | 4.046646781 | vinblastine     | formoterol      | 1.374408227 |
| capsaicin     | estrone         | 4.028108795 | diazoxide       | capsaicin       | 1.368486594 |
| calcitriol    | fluvastatin     | 4.014069091 | diazoxide       | fluoxetine      | 1.344276097 |
| icosapent     | calcitriol      | 3.969678879 | vinblastine     | bepidil         | 1.333142251 |
| chloroquine   | prazosin        | 3.965306864 | chloramphenicol | panobinostat    | 1.327629008 |
| nifedipine    | panobinostat    | 3.938118041 | fluoxetine      | formoterol      | 1.302091526 |
| vemurafenib   | calcitriol      | 3.935682271 | capsaicin       | formoterol      | 1.29980746  |
| capsaicin     | vemurafenib     | 3.924305059 | fluoxetine      | bepidil         | 1.293767141 |
| capsaicin     | icosapent       | 3.922833692 | capsaicin       | bepidil         | 1.287950868 |
| azacitidine   | decitabine      | 3.904178137 | vinblastine     | lamivudine      | 1.285723196 |
| diazoxide     | amitriptyline   | 3.879485828 | azelastine      | palbociclib     | 1.263513911 |
| pirfenidone   | chloramphenicol | 3.86605665  | cetirizine      | palbociclib     | 1.25164993  |
| bosutinib     | mebendazole     | 3.863732353 | azelastine      | cetirizine      | 1.239345286 |
| panobinostat  | azacitidine     | 3.856080254 | palbociclib     | eplerenone      | 1.234637149 |
| bosutinib     | eplerenone      | 3.852525145 | azelastine      | eplerenone      | 1.231811877 |
| pirfenidone   | fluoxetine      | 3.847993374 | chloramphenicol | bepidil         | 1.225923306 |
| amitriptyline | decitabine      | 3.846596497 | chloramphenicol | formoterol      | 1.225804869 |
| calcitriol    | estrone         | 3.841287756 | cetirizine      | eplerenone      | 1.220245568 |
| nifedipine    | diazoxide       | 3.797291985 | fluoxetine      | lamivudine      | 1.21608406  |
| diazoxide     | miglitol        | 3.7933416   | capsaicin       | lamivudine      | 1.214180101 |
| capsaicin     | pimozide        | 3.790817569 | diazoxide       | chloramphenicol | 1.205927477 |
| olopatadine   | amitriptyline   | 3.77323782  | omeprazole      | capsaicin       | 1.203399322 |
| fludarabine   | amitriptyline   | 3.770823394 | diazoxide       | eplerenone      | 1.20256773  |
| capsaicin     | mebendazole     | 3.767133309 | clozapine       | vinblastine     | 1.186709424 |
| diazoxide     | clozapine       | 3.760934514 | omeprazole      | fluoxetine      | 1.182109457 |
| chloroquine   | chloramphenicol | 3.754528815 | palbociclib     | panobinostat    | 1.179143086 |
| omeprazole    | decitabine      | 3.753720973 | azelastine      | panobinostat    | 1.166037563 |
| chloroquine   | fluoxetine      | 3.74328572  | cetirizine      | panobinostat    | 1.155088853 |
| eplerenone    | calcitriol      | 3.742450519 | panobinostat    | eplerenone      | 1.153163523 |
| azelastine    | decitabine      | 3.715811889 | diazoxide       | palbociclib     | 1.147435959 |
| clozapine     | decitabine      | 3.71403941  | chloramphenicol | lamivudine      | 1.144322236 |
| calcitriol    | mebendazole     | 3.710111503 | diazoxide       | azelastine      | 1.10092438  |
| capsaicin     | eplerenone      | 3.690586334 | levofloxacin    | clozapine       | 1.093482926 |
| vinblastine   | decitabine      | 3.685315812 | latanoprost     | vinblastine     | 1.090829303 |
| fludarabine   | miglitol        | 3.683170559 | diazoxide       | cetirizine      | 1.090587062 |
| nifedipine    | fludarabine     | 3.680582761 | palbociclib     | formoterol      | 1.085554205 |
| olopatadine   | miglitol        | 3.679890766 | palbociclib     | bepidil         | 1.075048143 |
| nifedipine    | olopatadine     | 3.668060101 | azelastine      | formoterol      | 1.074882404 |
| pirfenidone   | latanoprost     | 3.667307803 | azelastine      | bepidil         | 1.069182897 |

|              |               |             |                 |                 |             |
|--------------|---------------|-------------|-----------------|-----------------|-------------|
| miglitol     | panobinostat  | 3.664096274 | cetirizine      | formoterol      | 1.064789612 |
| irbesartan   | decitabine    | 3.65971561  | prazosin        | clozapine       | 1.063111473 |
| olopatadine  | clozapine     | 3.658307552 | omeprazole      | chloramphenicol | 1.060450512 |
| fludarabine  | clozapine     | 3.65574613  | cetirizine      | bepidil         | 1.059143621 |
| panobinostat | amitriptyline | 3.578600853 | formoterol      | eplerenone      | 1.058317246 |
| chloroquine  | latanoprost   | 3.569222656 | omeprazole      | eplerenone      | 1.057496068 |
| teniposide   | gatifloxacin  | 3.561357854 | eplerenone      | bepidil         | 1.03687158  |
| lamivudine   | decitabine    | 3.532732046 | levofloxacin    | latanoprost     | 1.017411875 |
| pirfenidone  | amitriptyline | 3.521223773 | palbociclib     | lamivudine      | 1.014080226 |
| teniposide   | azacitidine   | 3.517012254 | omeprazole      | palbociclib     | 1.009015113 |
| diazoxide    | vinblastine   | 3.513333884 | diazoxide       | panobinostat    | 1.006798557 |
| chloroquine  | amitriptyline | 3.494404813 | azelastine      | lamivudine      | 1.003807086 |
| panobinostat | clozapine     | 3.462787561 | panobinostat    | formoterol      | 1.00180692  |
| diazoxide    | irbesartan    | 3.454542726 | diazoxide       | bepidil         | 1.000755452 |
| diazoxide    | omeprazole    | 3.449381951 | panobinostat    | bepidil         | 0.999068688 |
| nilotinib    | decitabine    | 3.435080533 | cetirizine      | lamivudine      | 0.994381668 |
| diazoxide    | azelastine    | 3.425522534 | eplerenone      | lamivudine      | 0.989360659 |
| pirfenidone  | clozapine     | 3.417782468 | prazosin        | latanoprost     | 0.986915042 |
| fludarabine  | vinblastine   | 3.412864074 | omeprazole      | azelastine      | 0.968114455 |
| olopatadine  | vinblastine   | 3.412083065 | omeprazole      | cetirizine      | 0.959024178 |
| chloroquine  | clozapine     | 3.394097212 | diazoxide       | formoterol      | 0.945864608 |
| levofloxacin | azacitidine   | 3.386032339 | panobinostat    | lamivudine      | 0.935397283 |
| diazoxide    | fluvastatin   | 3.36016191  | clozapine       | capsaicin       | 0.924607514 |
| fludarabine  | irbesartan    | 3.35538534  | formoterol      | bepidil         | 0.918593756 |
| olopatadine  | irbesartan    | 3.354086904 | fluoxetine      | clozapine       | 0.900379861 |
| fludarabine  | omeprazole    | 3.349355571 | omeprazole      | panobinostat    | 0.885343493 |
| olopatadine  | omeprazole    | 3.346596048 | omeprazole      | bepidil         | 0.880029397 |
| levofloxacin | gatifloxacin  | 3.339180088 | diazoxide       | lamivudine      | 0.87944859  |
| pirfenidone  | miglitol      | 3.336698833 | formoterol      | lamivudine      | 0.862425807 |
| panobinostat | vinblastine   | 3.327632587 | lamivudine      | bepidil         | 0.858369717 |
| fludarabine  | azelastine    | 3.326310172 | capsaicin       | latanoprost     | 0.858338082 |
| omeprazole   | panobinostat  | 3.325337925 | clozapine       | eplerenone      | 0.838624859 |
| olopatadine  | azelastine    | 3.323745415 | fluoxetine      | latanoprost     | 0.837185685 |
| panobinostat | azelastine    | 3.297198836 | omeprazole      | formoterol      | 0.831760306 |
| diazoxide    | lamivudine    | 3.289302683 | chloramphenicol | clozapine       | 0.789746113 |
| panobinostat | irbesartan    | 3.287463127 | clozapine       | palbociclib     | 0.776593866 |
| gatifloxacin | azacitidine   | 3.27583749  | latanoprost     | eplerenone      | 0.774074877 |
| olopatadine  | fluvastatin   | 3.270170124 | omeprazole      | lamivudine      | 0.77335638  |
| fludarabine  | fluvastatin   | 3.266879396 | chloramphenicol | latanoprost     | 0.737400446 |
| chloroquine  | miglitol      | 3.251351204 | clozapine       | azelastine      | 0.734737739 |
| decitabine   | fluvastatin   | 3.250119727 | clozapine       | cetirizine      | 0.727838793 |
| mifepristone | azacitidine   | 3.237988323 | latanoprost     | palbociclib     | 0.720705493 |
| formoterol   | decitabine    | 3.219228733 | clozapine       | bepidil         | 0.686095577 |
| levofloxacin | teniposide    | 3.206857453 | latanoprost     | azelastine      | 0.683623752 |
| fludarabine  | lamivudine    | 3.194396731 | latanoprost     | cetirizine      | 0.67720475  |
| olopatadine  | lamivudine    | 3.192453391 | clozapine       | panobinostat    | 0.666059578 |
| diazoxide    | nilotinib     | 3.17526356  | latanoprost     | bepidil         | 0.635229629 |
| nifedipine   | pirfenidone   | 3.165992823 | clozapine       | formoterol      | 0.63125355  |
| panobinostat | lamivudine    | 3.150891395 | latanoprost     | panobinostat    | 0.620732605 |
| mifepristone | gatifloxacin  | 3.141998492 | latanoprost     | formoterol      | 0.587338716 |
| pirfenidone  | vinblastine   | 3.13294116  | clozapine       | lamivudine      | 0.585751789 |
| pimozide     | decitabine    | 3.130224891 | latanoprost     | lamivudine      | 0.545205084 |
| prazosin     | azacitidine   | 3.114932929 | diazoxide       | omeprazole      | 0.457298835 |
| icosapent    | decitabine    | 3.106170817 | diazoxide       | latanoprost     | 0.219496706 |
| diazoxide    | estrone       | 3.100443993 | diazoxide       | clozapine       | 0.210661556 |
| vemurafenib  | decitabine    | 3.09157248  | omeprazole      | latanoprost     | 0.193017738 |
| decitabine   | estrone       | 3.085171863 | omeprazole      | clozapine       | 0.185248416 |

|                 |                 |             |           |             |             |
|-----------------|-----------------|-------------|-----------|-------------|-------------|
| fludarabine     | nilotinib       | 3.083394105 | clozapine | latanoprost | 0.030355402 |
| olopatadine     | nilotinib       | 3.081152985 |           |             |             |
| chloroquine     | vinblastine     | 3.077547813 |           |             |             |
| pirfenidone     | fluvastatin     | 3.072471208 |           |             |             |
| pirfenidone     | irbesartan      | 3.070514571 |           |             |             |
| panobinostat    | fluvastatin     | 3.064475307 |           |             |             |
| chloroquine     | fluvastatin     | 3.061815428 |           |             |             |
| panobinostat    | nilotinib       | 3.052329837 |           |             |             |
| pirfenidone     | omeprazole      | 3.038346702 |           |             |             |
| prazosin        | gatifloxacin    | 3.028204655 |           |             |             |
| pirfenidone     | azelastine      | 3.020642287 |           |             |             |
| olopatadine     | estrone         | 3.015257131 |           |             |             |
| fludarabine     | estrone         | 3.01348952  |           |             |             |
| chloroquine     | irbesartan      | 3.010487575 |           |             |             |
| nifedipine      | chloroquine     | 2.983709465 |           |             |             |
| teniposide      | mifepristone    | 2.981262454 |           |             |             |
| chloramphenicol | azacitidine     | 2.972267771 |           |             |             |
| diazoxide       | formoterol      | 2.967733808 |           |             |             |
| chloroquine     | omeprazole      | 2.963074093 |           |             |             |
| chloroquine     | azelastine      | 2.947731782 |           |             |             |
| fluoxetine      | azacitidine     | 2.943637036 |           |             |             |
| decitabine      | mebendazole     | 2.937570575 |           |             |             |
| eplerenone      | decitabine      | 2.925734699 |           |             |             |
| pirfenidone     | lamivudine      | 2.910315124 |           |             |             |
| fludarabine     | formoterol      | 2.881780241 |           |             |             |
| olopatadine     | formoterol      | 2.87955824  |           |             |             |
| teniposide      | prazosin        | 2.87732777  |           |             |             |
| panobinostat    | estrone         | 2.864716767 |           |             |             |
| chloramphenicol | gatifloxacin    | 2.861878283 |           |             |             |
| fluoxetine      | gatifloxacin    | 2.857924586 |           |             |             |
| diazoxide       | vemurafenib     | 2.857737204 |           |             |             |
| panobinostat    | formoterol      | 2.85655936  |           |             |             |
| chloroquine     | lamivudine      | 2.845748557 |           |             |             |
| diazoxide       | icosapent       | 2.82680185  |           |             |             |
| pirfenidone     | estrone         | 2.811071267 |           |             |             |
| pirfenidone     | nilotinib       | 2.802531532 |           |             |             |
| latanoprost     | azacitidine     | 2.801423508 |           |             |             |
| diazoxide       | mebendazole     | 2.800483531 |           |             |             |
| chloroquine     | estrone         | 2.78794006  |           |             |             |
| fludarabine     | vemurafenib     | 2.775054695 |           |             |             |
| olopatadine     | vemurafenib     | 2.773037687 |           |             |             |
| teniposide      | amitriptyline   | 2.76725947  |           |             |             |
| panobinostat    | vemurafenib     | 2.747096853 |           |             |             |
| fludarabine     | icosapent       | 2.744522916 |           |             |             |
| olopatadine     | icosapent       | 2.74182081  |           |             |             |
| panobinostat    | icosapent       | 2.738033291 |           |             |             |
| chloroquine     | nilotinib       | 2.736375957 |           |             |             |
| latanoprost     | gatifloxacin    | 2.726278934 |           |             |             |
| fludarabine     | mebendazole     | 2.7203989   |           |             |             |
| olopatadine     | mebendazole     | 2.719776356 |           |             |             |
| gatifloxacin    | amitriptyline   | 2.718388577 |           |             |             |
| teniposide      | fluoxetine      | 2.712836866 |           |             |             |
| teniposide      | chloramphenicol | 2.699448984 |           |             |             |
| levofloxacin    | mifepristone    | 2.696710423 |           |             |             |
| teniposide      | clozapine       | 2.695649885 |           |             |             |
| diazoxide       | eplerenone      | 2.652883542 |           |             |             |
| panobinostat    | mebendazole     | 2.652460758 |           |             |             |

|                 |                 |             |
|-----------------|-----------------|-------------|
| nifedipine      | azacitidine     | 2.646928083 |
| gatifloxacin    | clozapine       | 2.64203907  |
| pirfenidone     | formoterol      | 2.616961982 |
| levofloxacin    | prazosin        | 2.604718109 |
| levofloxacin    | amitriptyline   | 2.597252674 |
| teniposide      | latanoprost     | 2.592494722 |
| panobinostat    | pimozide        | 2.580332649 |
| fludarabine     | eplerenone      | 2.575557694 |
| panobinostat    | eplerenone      | 2.574166041 |
| olopatadine     | eplerenone      | 2.572864897 |
| chloroquine     | formoterol      | 2.553795276 |
| miglitol        | azacitidine     | 2.539757496 |
| levofloxacin    | clozapine       | 2.532895712 |
| amitriptyline   | azacitidine     | 2.532172495 |
| pirfenidone     | vemurafenib     | 2.522278379 |
| pirfenidone     | mebendazole     | 2.497271939 |
| diazoxide       | pimozide        | 2.487970535 |
| gatifloxacin    | miglitol        | 2.486327602 |
| pirfenidone     | icosapent       | 2.481647421 |
| teniposide      | fluvastatin     | 2.467201962 |
| chloroquine     | vemurafenib     | 2.462738361 |
| levofloxacin    | fluoxetine      | 2.45446404  |
| chloroquine     | mebendazole     | 2.453117822 |
| clozapine       | azacitidine     | 2.452295429 |
| mifepristone    | amitriptyline   | 2.445426572 |
| levofloxacin    | chloramphenicol | 2.433770537 |
| chloroquine     | icosapent       | 2.41534195  |
| fludarabine     | pimozide        | 2.411500896 |
| olopatadine     | pimozide        | 2.403292904 |
| mifepristone    | prazosin        | 2.396259374 |
| gatifloxacin    | fluvastatin     | 2.391006641 |
| mifepristone    | clozapine       | 2.38650471  |
| teniposide      | miglitol        | 2.374858143 |
| gatifloxacin    | vinblastine     | 2.371490903 |
| prazosin        | amitriptyline   | 2.356688407 |
| levofloxacin    | latanoprost     | 2.347896286 |
| teniposide      | vinblastine     | 2.331964147 |
| levofloxacin    | fluvastatin     | 2.331131444 |
| vinblastine     | azacitidine     | 2.32675401  |
| pirfenidone     | eplerenone      | 2.326006101 |
| gatifloxacin    | irbesartan      | 2.315658866 |
| omeprazole      | azacitidine     | 2.306944667 |
| prazosin        | clozapine       | 2.299718313 |
| irbesartan      | azacitidine     | 2.293820228 |
| azelastine      | azacitidine     | 2.289000055 |
| gatifloxacin    | omeprazole      | 2.267665197 |
| chloroquine     | eplerenone      | 2.262135062 |
| teniposide      | irbesartan      | 2.261815708 |
| gatifloxacin    | azelastine      | 2.257327349 |
| mifepristone    | fluoxetine      | 2.25721102  |
| mifepristone    | chloramphenicol | 2.232961274 |
| chloramphenicol | amitriptyline   | 2.228091122 |
| fluoxetine      | amitriptyline   | 2.224283465 |
| nifedipine      | gatifloxacin    | 2.207669771 |
| mifepristone    | fluvastatin     | 2.203951562 |
| teniposide      | estrone         | 2.202060963 |
| lamivudine      | azacitidine     | 2.19209907  |

|                 |                 |             |
|-----------------|-----------------|-------------|
| gatifloxacin    | lamivudine      | 2.18337337  |
| prazosin        | fluoxetine      | 2.181292393 |
| azacitidine     | fluvastatin     | 2.179635494 |
| chloramphenicol | clozapine       | 2.175145414 |
| teniposide      | omeprazole      | 2.172595797 |
| fluoxetine      | clozapine       | 2.170638483 |
| teniposide      | azelastine      | 2.167875599 |
| gatifloxacin    | estrone         | 2.167576949 |
| mifepristone    | latanoprost     | 2.160614428 |
| prazosin        | chloramphenicol | 2.158453465 |
| levofloxacin    | miglitol        | 2.156060256 |
| levofloxacin    | vinblastine     | 2.150347504 |
| prazosin        | fluvastatin     | 2.122963422 |
| latanoprost     | amitriptyline   | 2.121628545 |
| nilotinib       | azacitidine     | 2.120230652 |
| teniposide      | lamivudine      | 2.112144101 |
| gatifloxacin    | nilotinib       | 2.096561232 |
| prazosin        | latanoprost     | 2.087784276 |
| levofloxacin    | irbesartan      | 2.078294384 |
| pirfenidone     | pimozide        | 2.07428561  |
| latanoprost     | clozapine       | 2.070246141 |
| levofloxacin    | estrone         | 2.064683871 |
| amitriptyline   | clozapine       | 2.048261258 |
| chloramphenicol | fluoxetine      | 2.032833692 |
| azacitidine     | estrone         | 2.025517837 |
| teniposide      | nilotinib       | 2.017491786 |
| chloramphenicol | fluvastatin     | 2.01209491  |
| fluoxetine      | fluvastatin     | 2.004365548 |
| mifepristone    | vinblastine     | 2.002158051 |
| mifepristone    | miglitol        | 1.98728079  |
| formoterol      | azacitidine     | 1.983096822 |
| levofloxacin    | omeprazole      | 1.975714347 |
| levofloxacin    | azelastine      | 1.973993169 |
| fluoxetine      | latanoprost     | 1.966767381 |
| gatifloxacin    | formoterol      | 1.955656874 |
| chloroquine     | pimozide        | 1.95482079  |
| chloramphenicol | latanoprost     | 1.946475927 |
| mifepristone    | estrone         | 1.942762426 |
| miglitol        | amitriptyline   | 1.934445838 |
| prazosin        | vinblastine     | 1.932009789 |
| levofloxacin    | lamivudine      | 1.930812284 |
| mifepristone    | irbesartan      | 1.930673172 |
| prazosin        | miglitol        | 1.919928641 |
| latanoprost     | fluvastatin     | 1.910701697 |
| vemurafenib     | azacitidine     | 1.908207587 |
| icosapent       | azacitidine     | 1.895548513 |
| gatifloxacin    | mebendazole     | 1.890318836 |
| miglitol        | clozapine       | 1.887110203 |
| gatifloxacin    | vemurafenib     | 1.886905109 |
| teniposide      | formoterol      | 1.878159505 |
| prazosin        | estrone         | 1.872401351 |
| prazosin        | irbesartan      | 1.863524773 |
| teniposide      | mebendazole     | 1.858812001 |
| azacitidine     | mebendazole     | 1.854658993 |
| amitriptyline   | fluvastatin     | 1.852466766 |
| gatifloxacin    | icosapent       | 1.844960253 |
| vinblastine     | amitriptyline   | 1.842252266 |

|                 |               |             |
|-----------------|---------------|-------------|
| levofloxacin    | nilotinib     | 1.839043726 |
| nifedipine      | teniposide    | 1.835220407 |
| mifepristone    | omeprazole    | 1.823041973 |
| mifepristone    | azelastine    | 1.82300985  |
| fluoxetine      | vinblastine   | 1.821792529 |
| teniposide      | vemurafenib   | 1.815742608 |
| chloramphenicol | vinblastine   | 1.814277567 |
| fluoxetine      | miglitol      | 1.808884175 |
| irbesartan      | amitriptyline | 1.799529931 |
| clozapine       | fluvastatin   | 1.798670296 |
| vinblastine     | clozapine     | 1.794088823 |
| chloramphenicol | miglitol      | 1.791768819 |
| mifepristone    | lamivudine    | 1.787704628 |
| eplerenone      | azacitidine   | 1.780700769 |
| chloramphenicol | estrone       | 1.769558328 |
| fluoxetine      | estrone       | 1.767113675 |
| omeprazole      | amitriptyline | 1.764038035 |
| prazosin        | omeprazole    | 1.761029788 |
| prazosin        | azelastine    | 1.7608219   |
| fluoxetine      | irbesartan    | 1.756884285 |
| azelastine      | amitriptyline | 1.755775172 |
| teniposide      | icosapent     | 1.754608789 |
| irbesartan      | clozapine     | 1.753188426 |
| chloramphenicol | irbesartan    | 1.747535234 |
| latanoprost     | vinblastine   | 1.740579596 |
| miglitol        | fluvastatin   | 1.73948504  |
| pimozide        | azacitidine   | 1.734292851 |
| latanoprost     | miglitol      | 1.730848793 |
| nifedipine      | amitriptyline | 1.729296238 |
| gatifloxacin    | eplerenone    | 1.726672381 |
| prazosin        | lamivudine    | 1.726201731 |
| omeprazole      | clozapine     | 1.720567695 |
| levofloxacin    | mebendazole   | 1.714045112 |
| azelastine      | clozapine     | 1.712269064 |
| levofloxacin    | formoterol    | 1.710187631 |
| nifedipine      | clozapine     | 1.699606352 |
| mifepristone    | nilotinib     | 1.699581814 |
| lamivudine      | amitriptyline | 1.697601172 |
| latanoprost     | estrone       | 1.685714456 |
| amitriptyline   | estrone       | 1.680835685 |
| latanoprost     | irbesartan    | 1.679131414 |
| fluoxetine      | omeprazole    | 1.659326391 |
| fluoxetine      | azelastine    | 1.659248276 |
| levofloxacin    | vemurafenib   | 1.655139353 |
| lamivudine      | clozapine     | 1.654830348 |
| chloramphenicol | azelastine    | 1.645259211 |
| chloramphenicol | omeprazole    | 1.644586347 |
| prazosin        | nilotinib     | 1.641468107 |
| vinblastine     | fluvastatin   | 1.639828592 |
| teniposide      | eplerenone    | 1.637448856 |
| clozapine       | estrone       | 1.633627211 |
| amitriptyline   | nilotinib     | 1.630558462 |
| fluoxetine      | lamivudine    | 1.626971019 |
| nifedipine      | fluvastatin   | 1.623608458 |
| chloramphenicol | lamivudine    | 1.615457196 |
| irbesartan      | fluvastatin   | 1.605630941 |
| mifepristone    | mebendazole   | 1.595923084 |

|                 |              |             |
|-----------------|--------------|-------------|
| miglitol        | vinblastine  | 1.593554463 |
| nilotinib       | clozapine    | 1.589969821 |
| levofloxacin    | icosapent    | 1.589156022 |
| latanoprost     | omeprazole   | 1.587484116 |
| latanoprost     | azelastine   | 1.587207146 |
| omeprazole      | fluvastatin  | 1.584596865 |
| mifepristone    | formoterol   | 1.579381805 |
| azelastine      | fluvastatin  | 1.575873905 |
| latanoprost     | lamivudine   | 1.555737457 |
| fluoxetine      | nilotinib    | 1.546870172 |
| prazosin        | mebendazole  | 1.540007803 |
| miglitol        | irbesartan   | 1.538587155 |
| miglitol        | estrone      | 1.537347601 |
| chloramphenicol | nilotinib    | 1.534406515 |
| nifedipine      | levofloxacin | 1.530090117 |
| mifepristone    | vemurafenib  | 1.529623633 |
| prazosin        | formoterol   | 1.525504687 |
| amitriptyline   | formoterol   | 1.521132407 |
| lamivudine      | fluvastatin  | 1.519823691 |
| irbesartan      | vinblastine  | 1.513426367 |
| clozapine       | formoterol   | 1.483440479 |
| levofloxacin    | eplerenone   | 1.480713    |
| latanoprost     | nilotinib    | 1.479552482 |
| fluvastatin     | estrone      | 1.478408687 |
| prazosin        | vemurafenib  | 1.477321296 |
| amitriptyline   | mebendazole  | 1.468461952 |
| amitriptyline   | vemurafenib  | 1.467502616 |
| vinblastine     | estrone      | 1.466341703 |
| nilotinib       | fluvastatin  | 1.462480682 |
| mifepristone    | icosapent    | 1.462451752 |
| miglitol        | omeprazole   | 1.458238031 |
| miglitol        | azelastine   | 1.4575236   |
| omeprazole      | vinblastine  | 1.457269961 |
| azelastine      | vinblastine  | 1.453661708 |
| fluoxetine      | mebendazole  | 1.452153465 |
| gatifloxacin    | pimozide     | 1.446359149 |
| chloramphenicol | mebendazole  | 1.446163278 |
| fluoxetine      | formoterol   | 1.437505419 |
| amitriptyline   | icosapent    | 1.435766105 |
| irbesartan      | estrone      | 1.431819604 |
| clozapine       | vemurafenib  | 1.430972839 |
| clozapine       | mebendazole  | 1.430070801 |
| miglitol        | lamivudine   | 1.427274218 |
| chloramphenicol | formoterol   | 1.42538586  |
| vinblastine     | lamivudine   | 1.414989975 |
| prazosin        | icosapent    | 1.413148931 |
| omeprazole      | irbesartan   | 1.407808106 |
| azelastine      | irbesartan   | 1.404952902 |
| omeprazole      | estrone      | 1.40214413  |
| clozapine       | icosapent    | 1.400985657 |
| azelastine      | estrone      | 1.395752025 |
| fluoxetine      | vemurafenib  | 1.392183155 |
| latanoprost     | mebendazole  | 1.387418518 |
| chloramphenicol | vemurafenib  | 1.380965863 |
| latanoprost     | formoterol   | 1.375091906 |
| irbesartan      | lamivudine   | 1.369433092 |
| formoterol      | fluvastatin  | 1.365273245 |

|                 |                 |             |
|-----------------|-----------------|-------------|
| nifedipine      | estrone         | 1.365047721 |
| mifepristone    | eplerenone      | 1.361238692 |
| miglitol        | nilotinib       | 1.358310516 |
| vinblastine     | nilotinib       | 1.352481008 |
| lamivudine      | estrone         | 1.350024755 |
| amitriptyline   | eplerenone      | 1.343912144 |
| omeprazole      | azelastine      | 1.335607518 |
| latanoprost     | vemurafenib     | 1.331597234 |
| fluoxetine      | icosapent       | 1.331241035 |
| nifedipine      | mifepristone    | 1.32784258  |
| chloramphenicol | icosapent       | 1.317533506 |
| vemurafenib     | fluvastatin     | 1.316232614 |
| prazosin        | eplerenone      | 1.315509409 |
| clozapine       | eplerenone      | 1.311572115 |
| irbesartan      | nilotinib       | 1.307649454 |
| mebendazole     | fluvastatin     | 1.307109747 |
| omeprazole      | lamivudine      | 1.307048649 |
| azelastine      | lamivudine      | 1.305253164 |
| nilotinib       | estrone         | 1.296347021 |
| icosapent       | fluvastatin     | 1.292979642 |
| nifedipine      | prazosin        | 1.292223479 |
| latanoprost     | icosapent       | 1.274110826 |
| miglitol        | mebendazole     | 1.270224572 |
| miglitol        | formoterol      | 1.26273934  |
| vinblastine     | formoterol      | 1.259393554 |
| nifedipine      | vinblastine     | 1.254848166 |
| omeprazole      | nilotinib       | 1.244472927 |
| azelastine      | nilotinib       | 1.243216475 |
| vinblastine     | mebendazole     | 1.242727192 |
| fluoxetine      | eplerenone      | 1.239153383 |
| chloramphenicol | eplerenone      | 1.225709424 |
| miglitol        | vemurafenib     | 1.222479464 |
| vinblastine     | vemurafenib     | 1.217232907 |
| irbesartan      | formoterol      | 1.217194219 |
| lamivudine      | nilotinib       | 1.215514872 |
| eplerenone      | fluvastatin     | 1.211430384 |
| nifedipine      | fluoxetine      | 1.211236458 |
| formoterol      | estrone         | 1.209222953 |
| irbesartan      | mebendazole     | 1.206354351 |
| teniposide      | pimozide        | 1.2022416   |
| latanoprost     | eplerenone      | 1.186159658 |
| nifedipine      | irbesartan      | 1.178212137 |
| vinblastine     | icosapent       | 1.178014021 |
| irbesartan      | vemurafenib     | 1.176884509 |
| miglitol        | icosapent       | 1.171532073 |
| nifedipine      | latanoprost     | 1.169713401 |
| mebendazole     | estrone         | 1.168823097 |
| vemurafenib     | estrone         | 1.166712319 |
| omeprazole      | mebendazole     | 1.161591998 |
| nifedipine      | chloramphenicol | 1.15996937  |
| azelastine      | mebendazole     | 1.158715854 |
| omeprazole      | formoterol      | 1.157116191 |
| azelastine      | formoterol      | 1.156108149 |
| icosapent       | estrone         | 1.14077695  |
| irbesartan      | icosapent       | 1.136448854 |
| pimozide        | amitriptyline   | 1.132956342 |
| lamivudine      | formoterol      | 1.130818409 |



|                 |             |             |
|-----------------|-------------|-------------|
| lamivudine      | mebendazole | 1.12789056  |
| omeprazole      | vemurafenib | 1.120025635 |
| azelastine      | vemurafenib | 1.118894828 |
| pimozide        | clozapine   | 1.113509766 |
| vinblastine     | eplerenone  | 1.099755693 |
| nifedipine      | miglitol    | 1.099316228 |
| lamivudine      | vemurafenib | 1.093963385 |
| miglitol        | eplerenone  | 1.091081457 |
| nilotinib       | mebendazole | 1.078064572 |
| nilotinib       | formoterol  | 1.077072338 |
| omeprazole      | icosapent   | 1.074484796 |
| azelastine      | icosapent   | 1.074289273 |
| eplerenone      | estrone     | 1.067637121 |
| pimozide        | fluvastatin | 1.063741074 |
| irbesartan      | eplerenone  | 1.06038073  |
| lamivudine      | icosapent   | 1.052965589 |
| nifedipine      | lamivudine  | 1.047704373 |
| nilotinib       | vemurafenib | 1.0422835   |
| nifedipine      | azelastine  | 1.034359985 |
| nifedipine      | omeprazole  | 1.023011189 |
| formoterol      | mebendazole | 1.003864427 |
| levofloxacin    | pimozide    | 1.002291676 |
| nilotinib       | icosapent   | 1.001417813 |
| azelastine      | eplerenone  | 1.000980439 |
| omeprazole      | eplerenone  | 1.000959019 |
| nifedipine      | mebendazole | 1.000241292 |
| lamivudine      | eplerenone  | 0.981709688 |
| nifedipine      | nilotinib   | 0.973083714 |
| vemurafenib     | mebendazole | 0.970258114 |
| formoterol      | vemurafenib | 0.969365104 |
| icosapent       | mebendazole | 0.938996683 |
| nilotinib       | eplerenone  | 0.93323851  |
| formoterol      | icosapent   | 0.930720661 |
| icosapent       | vemurafenib | 0.901276032 |
| nifedipine      | formoterol  | 0.896127545 |
| pimozide        | estrone     | 0.894313672 |
| eplerenone      | mebendazole | 0.876616857 |
| nifedipine      | vemurafenib | 0.875775342 |
| mifepristone    | pimozide    | 0.869768385 |
| formoterol      | eplerenone  | 0.86720886  |
| prazosin        | pimozide    | 0.84644189  |
| vemurafenib     | eplerenone  | 0.839914659 |
| pimozide        | vinblastine | 0.822053796 |
| icosapent       | eplerenone  | 0.802875467 |
| fluoxetine      | pimozide    | 0.793389952 |
| nifedipine      | icosapent   | 0.792152673 |
| pimozide        | irbesartan  | 0.771834702 |
| latanoprost     | pimozide    | 0.766196866 |
| chloramphenicol | pimozide    | 0.759788157 |
| nifedipine      | eplerenone  | 0.726956278 |
| miglitol        | pimozide    | 0.720097137 |
| pimozide        | lamivudine  | 0.686319939 |
| azelastine      | pimozide    | 0.677561663 |
| omeprazole      | pimozide    | 0.670121804 |
| pimozide        | mebendazole | 0.655260272 |
| pimozide        | nilotinib   | 0.63742685  |
| pimozide        | formoterol  | 0.587011947 |

|            |             |             |
|------------|-------------|-------------|
| pimozide   | vemurafenib | 0.573684165 |
| pimozide   | icosapent   | 0.518883644 |
| pimozide   | eplerenone  | 0.476172531 |
| nifedipine | pimozide    | 0.085782058 |

| NF1_PrimaryMelanoma_TCGASKCM |              |             | TWT_PrimaryMelanoma_TCGASKCM |              |             |
|------------------------------|--------------|-------------|------------------------------|--------------|-------------|
| drug1                        | drug2        | score       | drug1                        | drug2        | score       |
| mifepristone                 | tretinoin    | 27.55449655 | chloroquine                  | tretinoin    | 9.909066141 |
| tretinoin                    | estradiol    | 26.41790275 | pirfenidone                  | tretinoin    | 9.609671428 |
| chloroquine                  | tretinoin    | 25.86051977 | tretinoin                    | bosutinib    | 9.266556553 |
| pirfenidone                  | tretinoin    | 24.01822385 | tretinoin                    | estradiol    | 9.071217195 |
| fluoxetine                   | tretinoin    | 23.27403058 | tretinoin                    | etoposide    | 8.536740237 |
| levofloxacin                 | tretinoin    | 22.86953569 | nifedipine                   | tretinoin    | 8.111411285 |
| prazosin                     | tretinoin    | 22.61938055 | mifepristone                 | tretinoin    | 7.911821032 |
| tretinoin                    | bosutinib    | 22.4815161  | tretinoin                    | fluoxetine   | 7.639154805 |
| nifedipine                   | tretinoin    | 22.11713947 | prazosin                     | tretinoin    | 7.411372908 |
| tretinoin                    | capsaicin    | 21.23007606 | latanoprost                  | tretinoin    | 7.034566603 |
| tretinoin                    | olopatadine  | 19.73041145 | tretinoin                    | olopatadine  | 6.956407434 |
| tretinoin                    | calcitriol   | 19.61787809 | tretinoin                    | rofecoxib    | 6.770685356 |
| tretinoin                    | propranolol  | 19.17318406 | tretinoin                    | capsaicin    | 6.271161691 |
| tretinoin                    | latanoprost  | 19.08541245 | chloroquine                  | estradiol    | 6.134989961 |
| tretinoin                    | etoposide    | 18.88252601 | pirfenidone                  | estradiol    | 5.909737    |
| tretinoin                    | celecoxib    | 18.68422389 | tretinoin                    | vinblastine  | 5.884420996 |
| mifepristone                 | estradiol    | 17.64193635 | bosutinib                    | estradiol    | 5.821879987 |
| tretinoin                    | rofecoxib    | 16.97597326 | tretinoin                    | testosterone | 5.669149928 |
| tretinoin                    | alitretinoin | 16.96115661 | tretinoin                    | icosapent    | 5.637516259 |
| chloroquine                  | estradiol    | 16.30624986 | etoposide                    | estradiol    | 5.490484934 |
| tretinoin                    | azelastine   | 16.22056525 | chloroquine                  | etoposide    | 5.40895997  |
| tretinoin                    | pimozide     | 15.46723421 | bosutinib                    | etoposide    | 5.222156473 |
| pirfenidone                  | estradiol    | 14.99678853 | tretinoin                    | decitabine   | 5.200477083 |
| tretinoin                    | vinblastine  | 14.85609911 | pirfenidone                  | etoposide    | 5.168324334 |
| tretinoin                    | flurbiprofen | 14.81656745 | tretinoin                    | fluvastatin  | 5.101344656 |
| bosutinib                    | estradiol    | 14.58860748 | chloroquine                  | bosutinib    | 4.986632108 |
| fluoxetine                   | estradiol    | 14.58137438 | tretinoin                    | propranolol  | 4.942778621 |
| tretinoin                    | eplerenone   | 14.36108478 | tretinoin                    | clozapine    | 4.864861012 |
| tretinoin                    | azacitidine  | 14.23908546 | tretinoin                    | eplerenone   | 4.848036143 |
| levofloxacin                 | estradiol    | 14.1764279  | nifedipine                   | estradiol    | 4.823971953 |
| prazosin                     | estradiol    | 14.05748389 | tretinoin                    | lamivudine   | 4.785259251 |
| tretinoin                    | icosapent    | 13.90273672 | mifepristone                 | estradiol    | 4.699301118 |
| tretinoin                    | formoterol   | 13.66326893 | tretinoin                    | azacitidine  | 4.659993668 |
| nifedipine                   | estradiol    | 13.60506686 | pirfenidone                  | bosutinib    | 4.655881926 |
| capsaicin                    | estradiol    | 13.52768942 | fluoxetine                   | estradiol    | 4.633517443 |
| estradiol                    | calcitriol   | 13.00141017 | tretinoin                    | paclitaxel   | 4.596231487 |
| tretinoin                    | fluvastatin  | 12.88796868 | tretinoin                    | pimozide     | 4.560807199 |
| tretinoin                    | clozapine    | 12.66773481 | prazosin                     | estradiol    | 4.386563204 |
| tretinoin                    | cladribine   | 12.66072811 | pirfenidone                  | chloroquine  | 4.352450997 |
| tretinoin                    | paclitaxel   | 12.64318132 | olopatadine                  | estradiol    | 4.291418959 |
| mifepristone                 | calcitriol   | 12.62232841 | latanoprost                  | estradiol    | 4.16927391  |
| tretinoin                    | naproxen     | 12.57748518 | rofecoxib                    | estradiol    | 4.116192531 |
| tretinoin                    | cetirizine   | 12.56728479 | nifedipine                   | etoposide    | 4.04437592  |
| olopatadine                  | estradiol    | 12.4281673  | fluoxetine                   | etoposide    | 3.983889246 |
| mifepristone                 | bosutinib    | 12.37816977 | mifepristone                 | etoposide    | 3.933300978 |
| estradiol                    | etoposide    | 12.26090612 | olopatadine                  | etoposide    | 3.76723191  |
| estradiol                    | celecoxib    | 12.22706751 | capsaicin                    | estradiol    | 3.711707327 |
| propranolol                  | estradiol    | 12.10148767 | prazosin                     | etoposide    | 3.654521129 |
| tretinoin                    | lamivudine   | 11.87489166 | vinblastine                  | estradiol    | 3.589234294 |

|              |              |             |              |              |             |
|--------------|--------------|-------------|--------------|--------------|-------------|
| latanoprost  | estradiol    | 11.72975224 | rofecoxib    | etoposide    | 3.549253788 |
| chloroquine  | calcitriol   | 11.51876897 | estradiol    | testosterone | 3.545679827 |
| chloroquine  | mifepristone | 11.04750853 | latanoprost  | etoposide    | 3.479811582 |
| mifepristone | celecoxib    | 10.97650267 | bosutinib    | olopatadine  | 3.430786806 |
| estradiol    | alitreinoin  | 10.7360167  | estradiol    | icosapent    | 3.427290015 |
| chloroquine  | bosutinib    | 10.62653674 | fluoxetine   | bosutinib    | 3.410449351 |
| bosutinib    | calcitriol   | 10.55242706 | chloroquine  | olopatadine  | 3.236517085 |
| rofecoxib    | estradiol    | 10.52578494 | nifedipine   | bosutinib    | 3.18791993  |
| pirfenidone  | calcitriol   | 10.50535693 | etoposide    | testosterone | 3.163747304 |
| mifepristone | etoposide    | 10.44858111 | estradiol    | decitabine   | 3.137927159 |
| fluoxetine   | calcitriol   | 10.24410613 | etoposide    | vinblastine  | 3.10758368  |
| azelaistine  | estradiol    | 10.05484662 | estradiol    | fluvastatin  | 3.095189163 |
| mifepristone | capsaicin    | 10.01756102 | capsaicin    | etoposide    | 3.092287109 |
| levofloxacin | calcitriol   | 9.868398224 | mifepristone | bosutinib    | 3.082517951 |
| prazosin     | calcitriol   | 9.807576789 | bosutinib    | rofecoxib    | 3.065362336 |
| chloroquine  | celecoxib    | 9.6815557   | chloroquine  | fluoxetine   | 3.04708615  |
| capsaicin    | calcitriol   | 9.640409849 | bosutinib    | testosterone | 3.014313066 |
| pimozide     | estradiol    | 9.514378978 | estradiol    | propranolol  | 2.955460094 |
| bosutinib    | celecoxib    | 9.436431681 | etoposide    | icosapent    | 2.955236418 |
| nifedipine   | calcitriol   | 9.406806571 | pirfenidone  | olopatadine  | 2.948375859 |
| mifepristone | fluoxetine   | 9.311295845 | chloroquine  | testosterone | 2.947750352 |
| pirfenidone  | bosutinib    | 9.286377434 | estradiol    | eplerenone   | 2.944564739 |
| capsaicin    | bosutinib    | 9.280656077 | estradiol    | clozapine    | 2.892952571 |
| pirfenidone  | mifepristone | 9.267582559 | estradiol    | lamivudine   | 2.845165062 |
| estradiol    | vinblastine  | 9.266861081 | prazosin     | bosutinib    | 2.817598565 |
| estradiol    | flurbiprofen | 9.206511526 | estradiol    | paclitaxel   | 2.782277076 |
| fluoxetine   | bosutinib    | 9.192958744 | chloroquine  | rofecoxib    | 2.761222961 |
| bosutinib    | etoposide    | 9.158119771 | estradiol    | azacitidine  | 2.75810663  |
| chloroquine  | etoposide    | 8.989494798 | pirfenidone  | testosterone | 2.737305942 |
| estradiol    | eplerenone   | 8.930213027 | bosutinib    | vinblastine  | 2.717568521 |
| celecoxib    | calcitriol   | 8.903864911 | estradiol    | pimozide     | 2.712143035 |
| etoposide    | calcitriol   | 8.87322101  | latanoprost  | bosutinib    | 2.700219274 |
| estradiol    | azacitidine  | 8.849301334 | pirfenidone  | fluoxetine   | 2.690807349 |
| olopatadine  | calcitriol   | 8.771647482 | etoposide    | decitabine   | 2.680325744 |
| pirfenidone  | celecoxib    | 8.626812228 | etoposide    | fluvastatin  | 2.662288102 |
| estradiol    | icosapent    | 8.620254905 | nifedipine   | chloroquine  | 2.620004209 |
| propranolol  | calcitriol   | 8.5556404   | bosutinib    | icosapent    | 2.552330982 |
| prazosin     | bosutinib    | 8.485631871 | etoposide    | eplerenone   | 2.536029776 |
| fluoxetine   | celecoxib    | 8.481153989 | chloroquine  | mifepristone | 2.51724864  |
| estradiol    | formoterol   | 8.469623056 | etoposide    | propranolol  | 2.495298136 |
| levofloxacin | bosutinib    | 8.435391265 | chloroquine  | vinblastine  | 2.475700121 |
| mifepristone | olopatadine  | 8.342991245 | pirfenidone  | rofecoxib    | 2.450207569 |
| capsaicin    | celecoxib    | 8.296611083 | etoposide    | clozapine    | 2.425152247 |
| mifepristone | prazosin     | 8.285295283 | etoposide    | paclitaxel   | 2.386215115 |
| mifepristone | propranolol  | 8.270719754 | etoposide    | lamivudine   | 2.38459695  |
| levofloxacin | mifepristone | 8.131586706 | bosutinib    | capsaicin    | 2.384121863 |
| latanoprost  | calcitriol   | 8.103809126 | chloroquine  | icosapent    | 2.299093595 |
| estradiol    | fluvastatin  | 8.071033    | etoposide    | azacitidine  | 2.297825994 |
| olopatadine  | bosutinib    | 8.057202326 | bosutinib    | fluvastatin  | 2.281869613 |
| chloroquine  | capsaicin    | 7.973318207 | etoposide    | pimozide     | 2.273580232 |
| prazosin     | celecoxib    | 7.961684959 | chloroquine  | prazosin     | 2.258697226 |
| levofloxacin | celecoxib    | 7.95953945  | bosutinib    | decitabine   | 2.247614907 |
| etoposide    | celecoxib    | 7.944899093 | pirfenidone  | vinblastine  | 2.211362729 |
| propranolol  | bosutinib    | 7.925586016 | nifedipine   | pirfenidone  | 2.193324491 |
| estradiol    | cladribine   | 7.921408065 | bosutinib    | eplerenone   | 2.182413381 |
| pirfenidone  | etoposide    | 7.868332508 | chloroquine  | latanoprost  | 2.180604169 |
| capsaicin    | etoposide    | 7.838972866 | pirfenidone  | mifepristone | 2.0980584   |

|              |              |             |              |              |             |
|--------------|--------------|-------------|--------------|--------------|-------------|
| estradiol    | naproxen     | 7.81345348  | chloroquine  | fluvastatin  | 2.041071977 |
| estradiol    | paclitaxel   | 7.806020439 | pirfenidone  | icosapent    | 2.040130988 |
| estradiol    | clozapine    | 7.792319434 | fluoxetine   | olopatadine  | 2.036498431 |
| estradiol    | cetirizine   | 7.790241528 | bosutinib    | paclitaxel   | 2.026855631 |
| fluoxetine   | etoposide    | 7.784737043 | olopatadine  | testosterone | 2.022244163 |
| nifedipine   | bosutinib    | 7.743773689 | bosutinib    | propranolol  | 2.014463121 |
| alitretinoin | calcitriol   | 7.608602013 | fluoxetine   | testosterone | 1.980054874 |
| mifepristone | alitretinoin | 7.522669316 | chloroquine  | decitabine   | 1.969113287 |
| nifedipine   | celecoxib    | 7.438453734 | chloroquine  | eplerenone   | 1.959392269 |
| olopatadine  | celecoxib    | 7.355061919 | chloroquine  | capsaicin    | 1.911205345 |
| rofecoxib    | calcitriol   | 7.328764429 | bosutinib    | clozapine    | 1.91084449  |
| estradiol    | lamivudine   | 7.309918442 | bosutinib    | lamivudine   | 1.877540712 |
| propranolol  | celecoxib    | 7.207394607 | pirfenidone  | prazosin     | 1.858214848 |
| prazosin     | etoposide    | 7.195803254 | rofecoxib    | olopatadine  | 1.850042529 |
| nifedipine   | mifepristone | 7.158968796 | nifedipine   | testosterone | 1.810363934 |
| levofloxacin | etoposide    | 7.156593916 | pirfenidone  | fluvastatin  | 1.803644979 |
| bosutinib    | alitretinoin | 7.132274855 | pirfenidone  | latanoprost  | 1.803371005 |
| azelastine   | calcitriol   | 6.9993112   | chloroquine  | paclitaxel   | 1.797684954 |
| olopatadine  | etoposide    | 6.817055473 | bosutinib    | pimozide     | 1.79141671  |
| propranolol  | etoposide    | 6.703620884 | rofecoxib    | testosterone | 1.783686473 |
| chloroquine  | fluoxetine   | 6.680325354 | bosutinib    | azacitidine  | 1.771600436 |
| latanoprost  | bosutinib    | 6.641307827 | mifepristone | testosterone | 1.747646427 |
| fluoxetine   | capsaicin    | 6.64128882  | pirfenidone  | eplerenone   | 1.735300873 |
| nifedipine   | etoposide    | 6.579747563 | pirfenidone  | decitabine   | 1.718298814 |
| pimozide     | calcitriol   | 6.578372879 | nifedipine   | olopatadine  | 1.70431759  |
| pirfenidone  | capsaicin    | 6.564511159 | chloroquine  | propranolol  | 1.698594789 |
| vinblastine  | calcitriol   | 6.485963679 | olopatadine  | vinblastine  | 1.664379038 |
| chloroquine  | pirfenidone  | 6.472799199 | mifepristone | olopatadine  | 1.633883887 |
| alitretinoin | celecoxib    | 6.451660143 | prazosin     | testosterone | 1.589960718 |
| flurbiprofen | calcitriol   | 6.422145793 | vinblastine  | testosterone | 1.58623595  |
| latanoprost  | celecoxib    | 6.393167199 | pirfenidone  | paclitaxel   | 1.580521591 |
| rofecoxib    | bosutinib    | 6.27210967  | fluoxetine   | rofecoxib    | 1.58037208  |
| chloroquine  | propranolol  | 6.243364855 | pirfenidone  | capsaicin    | 1.572335641 |
| eplerenone   | calcitriol   | 6.233489931 | chloroquine  | clozapine    | 1.56976054  |
| chloroquine  | olopatadine  | 6.217484348 | chloroquine  | lamivudine   | 1.541181715 |
| azacitidine  | calcitriol   | 6.173949979 | olopatadine  | icosapent    | 1.540411981 |
| mifepristone | latanoprost  | 6.107867324 | latanoprost  | testosterone | 1.526562908 |
| mifepristone | rofecoxib    | 6.054009931 | icosapent    | testosterone | 1.48516154  |
| alitretinoin | etoposide    | 6.030033604 | chloroquine  | pimozide     | 1.471650506 |
| olopatadine  | capsaicin    | 6.010661099 | prazosin     | olopatadine  | 1.456606857 |
| icosapent    | calcitriol   | 6.002005351 | fluoxetine   | vinblastine  | 1.451931813 |
| bosutinib    | azelastine   | 5.982929268 | pirfenidone  | propranolol  | 1.446615299 |
| capsaicin    | propranolol  | 5.979233674 | chloroquine  | azacitidine  | 1.420184209 |
| rofecoxib    | celecoxib    | 5.914941023 | latanoprost  | olopatadine  | 1.409897984 |
| formoterol   | calcitriol   | 5.895816191 | olopatadine  | fluvastatin  | 1.364611505 |
| prazosin     | capsaicin    | 5.807450231 | capsaicin    | testosterone | 1.345351377 |
| chloroquine  | alitretinoin | 5.777323797 | rofecoxib    | vinblastine  | 1.331740024 |
| mifepristone | azelastine   | 5.767451274 | fluvastatin  | testosterone | 1.325230629 |
| bosutinib    | vinblastine  | 5.707769768 | fluoxetine   | icosapent    | 1.315874661 |
| mifepristone | vinblastine  | 5.67072375  | pirfenidone  | clozapine    | 1.313731356 |
| fluvastatin  | calcitriol   | 5.668244145 | olopatadine  | eplerenone   | 1.311491789 |
| levofloxacin | capsaicin    | 5.663924565 | olopatadine  | decitabine   | 1.308049991 |
| azelastine   | celecoxib    | 5.645424147 | decitabine   | testosterone | 1.298006714 |
| latanoprost  | etoposide    | 5.64403632  | pirfenidone  | lamivudine   | 1.289114404 |
| cladribine   | calcitriol   | 5.558757198 | eplerenone   | testosterone | 1.268761602 |
| bosutinib    | flurbiprofen | 5.551776404 | capsaicin    | olopatadine  | 1.232513494 |
| chloroquine  | prazosin     | 5.550003119 | pirfenidone  | pimozide     | 1.231623147 |

|              |              |             |              |              |             |
|--------------|--------------|-------------|--------------|--------------|-------------|
| capsaicin    | alitretinoin | 5.46397156  | rofecoxib    | icosapent    | 1.211141569 |
| naproxen     | calcitriol   | 5.449323082 | olopatadine  | paclitaxel   | 1.198762547 |
| cetirizine   | calcitriol   | 5.422889759 | nifedipine   | fluoxetine   | 1.182552732 |
| mifepristone | flurbiprofen | 5.415882099 | testosterone | paclitaxel   | 1.174416015 |
| bosutinib    | pimozide     | 5.415132062 | pirfenidone  | azacitidine  | 1.168375891 |
| paclitaxel   | calcitriol   | 5.414850258 | propranolol  | testosterone | 1.151606671 |
| bosutinib    | epplerenone  | 5.407629842 | fluoxetine   | fluvastatin  | 1.150062172 |
| clozapine    | calcitriol   | 5.387717154 | nifedipine   | rofecoxib    | 1.130388645 |
| bosutinib    | azacitidine  | 5.341774817 | olopatadine  | propranolol  | 1.114511926 |
| rofecoxib    | etoposide    | 5.321010982 | mifepristone | fluoxetine   | 1.11390011  |
| vinblastine  | celecoxib    | 5.31333565  | fluoxetine   | epplerenone  | 1.113276766 |
| chloroquine  | levofloxacin | 5.308786556 | vinblastine  | icosapent    | 1.108854664 |
| mifepristone | epplerenone  | 5.294551458 | nifedipine   | vinblastine  | 1.085577269 |
| mifepristone | azacitidine  | 5.215661293 | clozapine    | testosterone | 1.085015517 |
| flurbiprofen | celecoxib    | 5.211054395 | mifepristone | rofecoxib    | 1.068502788 |
| pimozide     | celecoxib    | 5.201739238 | lamivudine   | testosterone | 1.065888587 |
| bosutinib    | icosapent    | 5.13664154  | rofecoxib    | fluvastatin  | 1.060926813 |
| mifepristone | fluvastatin  | 5.133368067 | fluoxetine   | decitabine   | 1.057094667 |
| bosutinib    | fluvastatin  | 5.077228772 | mifepristone | vinblastine  | 1.030490568 |
| azelastine   | etoposide    | 5.075922842 | rofecoxib    | epplerenone  | 1.025750442 |
| epplerenone  | celecoxib    | 5.067462231 | olopatadine  | clozapine    | 1.020982018 |
| lamivudine   | calcitriol   | 5.057428849 | pimozide     | testosterone | 1.017202047 |
| fluoxetine   | propranolol  | 5.050489991 | olopatadine  | lamivudine   | 1.002122516 |
| bosutinib    | formoterol   | 5.039674653 | azacitidine  | testosterone | 0.999707743 |
| azacitidine  | celecoxib    | 5.011945942 | fluoxetine   | paclitaxel   | 0.993532631 |
| mifepristone | pimozide     | 5.005919744 | rofecoxib    | decitabine   | 0.982212747 |
| mifepristone | cladribine   | 4.993707768 | vinblastine  | fluvastatin  | 0.974224278 |
| nifedipine   | fluoxetine   | 4.992708645 | olopatadine  | pimozide     | 0.957170642 |
| fluoxetine   | olopatadine  | 4.9921282   | nifedipine   | icosapent    | 0.941202261 |
| bosutinib    | cladribine   | 4.958842274 | prazosin     | fluoxetine   | 0.94082773  |
| mifepristone | icosapent    | 4.958025374 | vinblastine  | epplerenone  | 0.940426548 |
| pirfenidone  | propranolol  | 4.904526459 | latanoprost  | fluoxetine   | 0.930953327 |
| nifedipine   | capsaicin    | 4.880512782 | rofecoxib    | paclitaxel   | 0.919136117 |
| mifepristone | formoterol   | 4.858168416 | olopatadine  | azacitidine  | 0.91585983  |
| icosapent    | celecoxib    | 4.844132734 | prazosin     | rofecoxib    | 0.912526762 |
| vinblastine  | etoposide    | 4.837010985 | vinblastine  | decitabine   | 0.910432815 |
| pirfenidone  | olopatadine  | 4.825329975 | latanoprost  | rofecoxib    | 0.898829232 |
| formoterol   | celecoxib    | 4.755379799 | prazosin     | vinblastine  | 0.891697155 |
| fluoxetine   | alitretinoin | 4.719389856 | mifepristone | icosapent    | 0.88967387  |
| flurbiprofen | etoposide    | 4.708054603 | icosapent    | fluvastatin  | 0.88336584  |
| bosutinib    | naproxen     | 4.70581433  | latanoprost  | vinblastine  | 0.873591933 |
| celecoxib    | fluvastatin  | 4.688065183 | icosapent    | epplerenone  | 0.854076728 |
| olopatadine  | propranolol  | 4.686183315 | vinblastine  | paclitaxel   | 0.847161574 |
| bosutinib    | cetirizine   | 4.635422676 | fluoxetine   | propranolol  | 0.826045669 |
| pirfenidone  | alitretinoin | 4.610614718 | icosapent    | decitabine   | 0.817825677 |
| pimozide     | etoposide    | 4.601150547 | nifedipine   | fluvastatin  | 0.798203369 |
| celecoxib    | cladribine   | 4.587336152 | fluoxetine   | capsaicin    | 0.796085002 |
| mifepristone | naproxen     | 4.58555375  | nifedipine   | epplerenone  | 0.785296749 |
| epplerenone  | etoposide    | 4.585188848 | rofecoxib    | propranolol  | 0.779641852 |
| bosutinib    | paclitaxel   | 4.540059939 | capsaicin    | rofecoxib    | 0.772138029 |
| azacitidine  | etoposide    | 4.529817131 | icosapent    | paclitaxel   | 0.765305804 |
| mifepristone | cetirizine   | 4.468475762 | prazosin     | icosapent    | 0.759802618 |
| bosutinib    | clozapine    | 4.435017662 | capsaicin    | vinblastine  | 0.754512978 |
| celecoxib    | naproxen     | 4.419191628 | mifepristone | fluvastatin  | 0.75225055  |
| celecoxib    | cetirizine   | 4.373932222 | latanoprost  | icosapent    | 0.748397561 |
| icosapent    | etoposide    | 4.357724512 | fluvastatin  | epplerenone  | 0.747470759 |
| propranolol  | alitretinoin | 4.344204252 | mifepristone | epplerenone  | 0.741288485 |

|              |              |             |              |             |             |
|--------------|--------------|-------------|--------------|-------------|-------------|
| olopatadine  | alitreinoin  | 4.342614654 | vinblastine  | propranolol | 0.737149843 |
| paclitaxel   | celecoxib    | 4.323127055 | decitabine   | fluvastatin | 0.710599972 |
| etoposide    | fluvastatin  | 4.299773405 | fluoxetine   | clozapine   | 0.707588585 |
| mifepristone | paclitaxel   | 4.285419095 | fluoxetine   | lamivudine  | 0.693021373 |
| etoposide    | formoterol   | 4.275664736 | decitabine   | epplerenone | 0.690029722 |
| chloroquine  | nifedipine   | 4.26448157  | rofecoxib    | clozapine   | 0.676532125 |
| clozapine    | celecoxib    | 4.260247973 | fluvastatin  | paclitaxel  | 0.667456932 |
| prazosin     | propranolol  | 4.220401056 | fluoxetine   | pimozide    | 0.663364298 |
| capsaicin    | rofecoxib    | 4.219521381 | nifedipine   | paclitaxel  | 0.663064407 |
| etoposide    | cladribine   | 4.200162539 | rofecoxib    | lamivudine  | 0.662887455 |
| bosutinib    | lamivudine   | 4.178356137 | nifedipine   | decitabine  | 0.662039844 |
| prazosin     | fluoxetine   | 4.161872005 | vinblastine  | clozapine   | 0.649894409 |
| latanoprost  | capsaicin    | 4.152423037 | icosapent    | propranolol | 0.64915786  |
| prazosin     | olopatadine  | 4.121232527 | epplerenone  | paclitaxel  | 0.646839154 |
| mifepristone | clozapine    | 4.099870921 | capsaicin    | icosapent   | 0.642909907 |
| levofloxacin | propranolol  | 4.046160452 | vinblastine  | lamivudine  | 0.637116099 |
| capsaicin    | azelastine   | 4.017224452 | prazosin     | fluvastatin | 0.636407953 |
| capsaicin    | vinblastine  | 4.008217454 | rofecoxib    | pimozide    | 0.634248867 |
| celecoxib    | lamivudine   | 4.006702222 | prazosin     | epplerenone | 0.630360052 |
| prazosin     | alitreinoin  | 4.005527126 | latanoprost  | fluvastatin | 0.62930254  |
| etoposide    | naproxen     | 3.990820744 | mifepristone | paclitaxel  | 0.622369532 |
| chloroquine  | rofecoxib    | 3.962847791 | latanoprost  | epplerenone | 0.62200079  |
| etoposide    | cetirizine   | 3.932696976 | mifepristone | decitabine  | 0.617107792 |
| levofloxacin | olopatadine  | 3.93226569  | decitabine   | paclitaxel  | 0.609352326 |
| chloroquine  | vinblastine  | 3.927678689 | vinblastine  | pimozide    | 0.609276008 |
| levofloxacin | fluoxetine   | 3.908495628 | fluoxetine   | azacitidine | 0.591557235 |
| mifepristone | lamivudine   | 3.878883277 | rofecoxib    | azacitidine | 0.573762646 |
| levofloxacin | alitreinoin  | 3.863238268 | icosapent    | clozapine   | 0.563304991 |
| etoposide    | paclitaxel   | 3.854747036 | vinblastine  | azacitidine | 0.56066577  |
| pirfenidone  | prazosin     | 3.844375432 | propranolol  | fluvastatin | 0.556536573 |
| capsaicin    | flurbiprofen | 3.794530056 | icosapent    | lamivudine  | 0.551943948 |
| etoposide    | clozapine    | 3.768363118 | propranolol  | epplerenone | 0.544334624 |
| chloroquine  | azelastine   | 3.765337429 | capsaicin    | fluvastatin | 0.538499037 |
| capsaicin    | epplerenone  | 3.716123324 | capsaicin    | epplerenone | 0.533381582 |
| chloroquine  | fluvastatin  | 3.671161236 | icosapent    | pimozide    | 0.528098429 |
| capsaicin    | fluvastatin  | 3.658340227 | prazosin     | paclitaxel  | 0.519756239 |
| capsaicin    | azacitidine  | 3.655837523 | latanoprost  | paclitaxel  | 0.516726862 |
| chloroquine  | flurbiprofen | 3.62152149  | latanoprost  | decitabine  | 0.505643447 |
| chloroquine  | latanoprost  | 3.593859352 | prazosin     | decitabine  | 0.503769611 |
| chloroquine  | epplerenone  | 3.565891928 | decitabine   | propranolol | 0.47977426  |
| pirfenidone  | levofloxacin | 3.56327113  | icosapent    | azacitidine | 0.477735425 |
| capsaicin    | cladribine   | 3.552217277 | clozapine    | fluvastatin | 0.477626651 |
| etoposide    | lamivudine   | 3.549753936 | clozapine    | epplerenone | 0.469953854 |
| chloroquine  | cladribine   | 3.545812127 | propranolol  | paclitaxel  | 0.469035984 |
| chloroquine  | azacitidine  | 3.493772455 | lamivudine   | fluvastatin | 0.467822975 |
| capsaicin    | icosapent    | 3.45564251  | lamivudine   | epplerenone | 0.460398678 |
| capsaicin    | pimozide     | 3.412610242 | fluvastatin  | pimozide    | 0.447774986 |
| capsaicin    | formoterol   | 3.383878254 | pimozide     | epplerenone | 0.440581738 |
| nifedipine   | propranolol  | 3.278141662 | capsaicin    | paclitaxel  | 0.439793741 |
| chloroquine  | icosapent    | 3.245435691 | capsaicin    | decitabine  | 0.426266594 |
| capsaicin    | naproxen     | 3.211040638 | azacitidine  | fluvastatin | 0.400149482 |
| nifedipine   | alitreinoin  | 3.19989515  | clozapine    | paclitaxel  | 0.396657153 |
| chloroquine  | formoterol   | 3.17170315  | azacitidine  | epplerenone | 0.396346788 |
| nifedipine   | olopatadine  | 3.128823347 | clozapine    | decitabine  | 0.39586448  |
| capsaicin    | cetirizine   | 3.11244417  | nifedipine   | propranolol | 0.394234361 |
| chloroquine  | naproxen     | 3.059584819 | lamivudine   | paclitaxel  | 0.388324406 |
| propranolol  | rofecoxib    | 3.019624716 | decitabine   | lamivudine  | 0.387222586 |

|              |              |             |              |              |             |
|--------------|--------------|-------------|--------------|--------------|-------------|
| fluoxetine   | vinblastine  | 3.012993068 | pimozide     | paclitaxel   | 0.371866081 |
| chloroquine  | pimozide     | 2.981575488 | decitabine   | pimozide     | 0.37112295  |
| propranolol  | vinblastine  | 2.97815491  | nifedipine   | mifepristone | 0.357019775 |
| capsaicin    | paclitaxel   | 2.953377004 | mifepristone | propranolol  | 0.354493917 |
| olopatadine  | rofecoxib    | 2.936078943 | azacitidine  | paclitaxel   | 0.326803254 |
| olopatadine  | vinblastine  | 2.925747292 | decitabine   | azacitidine  | 0.316751461 |
| fluoxetine   | rofecoxib    | 2.923183219 | latanoprost  | propranolol  | 0.270047086 |
| nifedipine   | fluoxetine   | 2.919433144 | prazosin     | propranolol  | 0.254140034 |
| chloroquine  | cetirizine   | 2.917288459 | nifedipine   | clozapine    | 0.249341205 |
| rofecoxib    | alitretinoin | 2.881328881 | nifedipine   | lamivudine   | 0.241329626 |
| fluoxetine   | fluvastatin  | 2.874869873 | nifedipine   | latanoprost  | 0.239254436 |
| propranolol  | azelastine   | 2.869800704 | clozapine    | propranolol  | 0.235188307 |
| pirfenidone  | vinblastine  | 2.82707505  | nifedipine   | pimozide     | 0.233757379 |
| alitretinoin | vinblastine  | 2.804978892 | propranolol  | lamivudine   | 0.229069839 |
| capsaicin    | clozapine    | 2.79494323  | propranolol  | pimozide     | 0.220489038 |
| olopatadine  | azelastine   | 2.789019116 | capsaicin    | propranolol  | 0.215041568 |
| propranolol  | fluvastatin  | 2.776216429 | mifepristone | clozapine    | 0.211976997 |
| fluoxetine   | azelastine   | 2.772159839 | mifepristone | lamivudine   | 0.204626402 |
| latanoprost  | propranolol  | 2.765954498 | nifedipine   | prazosin     | 0.199468758 |
| fluoxetine   | cladribine   | 2.764200419 | mifepristone | pimozide     | 0.198728434 |
| propranolol  | flurbiprofen | 2.754344967 | mifepristone | latanoprost  | 0.186756358 |
| levofloxacin | prazosin     | 2.746332752 | nifedipine   | capsaicin    | 0.168781257 |
| olopatadine  | fluvastatin  | 2.742634706 | propranolol  | azacitidine  | 0.159793734 |
| azelastine   | alitretinoin | 2.740060369 | mifepristone | prazosin     | 0.144822318 |
| pirfenidone  | fluvastatin  | 2.734695609 | clozapine    | lamivudine   | 0.143452584 |
| fluoxetine   | flurbiprofen | 2.712389123 | latanoprost  | clozapine    | 0.14154555  |
| propranolol  | epplerenone  | 2.710338088 | clozapine    | pimozide     | 0.138973293 |
| latanoprost  | alitretinoin | 2.708197322 | latanoprost  | lamivudine   | 0.135707009 |
| olopatadine  | flurbiprofen | 2.688757652 | lamivudine   | pimozide     | 0.134486798 |
| fluoxetine   | epplerenone  | 2.684120028 | latanoprost  | pimozide     | 0.132698954 |
| propranolol  | cladribine   | 2.683010079 | nifedipine   | azacitidine  | 0.125418484 |
| chloroquine  | paclitaxel   | 2.675843697 | mifepristone | capsaicin    | 0.122541961 |
| pirfenidone  | rofecoxib    | 2.66869737  | prazosin     | clozapine    | 0.117553148 |
| propranolol  | azacitidine  | 2.656777058 | prazosin     | lamivudine   | 0.111870845 |
| capsaicin    | lamivudine   | 2.650171847 | prazosin     | pimozide     | 0.110206076 |
| olopatadine  | epplerenone  | 2.649275912 | capsaicin    | clozapine    | 0.099468048 |
| olopatadine  | cladribine   | 2.647290063 | capsaicin    | lamivudine   | 0.094659946 |
| latanoprost  | olopatadine  | 2.633227617 | capsaicin    | pimozide     | 0.093251295 |
| pirfenidone  | cladribine   | 2.621646375 | mifepristone | azacitidine  | 0.091058849 |
| fluoxetine   | azacitidine  | 2.619932541 | clozapine    | azacitidine  | 0.073913016 |
| alitretinoin | flurbiprofen | 2.615176221 | lamivudine   | azacitidine  | 0.070340197 |
| alitretinoin | fluvastatin  | 2.596053547 | azacitidine  | pimozide     | 0.069293452 |
| olopatadine  | azacitidine  | 2.594349657 | prazosin     | latanoprost  | 0.054022836 |
| alitretinoin | epplerenone  | 2.569128542 | latanoprost  | capsaicin    | 0.04571163  |
| pirfenidone  | azelastine   | 2.527304124 | latanoprost  | azacitidine  | 0.033967536 |
| alitretinoin | azacitidine  | 2.521512158 | prazosin     | capsaicin    | 0.00560845  |
| nifedipine   | pirfenidone  | 2.515968729 | prazosin     | azacitidine  | 0.004167544 |
| alitretinoin | cladribine   | 2.512900799 | capsaicin    | azacitidine  | 0.003526383 |
| pirfenidone  | flurbiprofen | 2.503300614 |              |              |             |
| pirfenidone  | epplerenone  | 2.485916949 |              |              |             |
| propranolol  | icosapent    | 2.472968517 |              |              |             |
| chloroquine  | clozapine    | 2.441923816 |              |              |             |
| fluoxetine   | latanoprost  | 2.434092528 |              |              |             |
| pirfenidone  | azacitidine  | 2.420065846 |              |              |             |
| propranolol  | formoterol   | 2.417354647 |              |              |             |
| olopatadine  | icosapent    | 2.40454741  |              |              |             |
| fluoxetine   | icosapent    | 2.393986257 |              |              |             |

|              |              |             |
|--------------|--------------|-------------|
| alitretinoin | icosapent    | 2.359708997 |
| olopatadine  | formoterol   | 2.349308895 |
| fluoxetine   | formoterol   | 2.335107612 |
| chloroquine  | lamivudine   | 2.333014633 |
| propranolol  | naproxen     | 2.327411137 |
| alitretinoin | formoterol   | 2.308068869 |
| prazosin     | vinblastine  | 2.29659674  |
| propranolol  | pimozide     | 2.291988953 |
| fluoxetine   | naproxen     | 2.28799525  |
| prazosin     | fluvastatin  | 2.274608637 |
| olopatadine  | naproxen     | 2.271075447 |
| pimozide     | alitretinoin | 2.237349741 |
| propranolol  | cetirizine   | 2.223449194 |
| alitretinoin | naproxen     | 2.210935765 |
| olopatadine  | pimozide     | 2.187533598 |
| pirfenidone  | icosapent    | 2.185571122 |
| prazosin     | cladribine   | 2.169645511 |
| olopatadine  | cetirizine   | 2.160861657 |
| fluoxetine   | cetirizine   | 2.147799515 |
| levofloxacin | fluvastatin  | 2.132993986 |
| pirfenidone  | formoterol   | 2.128855276 |
| alitretinoin | cetirizine   | 2.122929655 |
| levofloxacin | vinblastine  | 2.119183552 |
| pirfenidone  | naproxen     | 2.109331663 |
| pirfenidone  | latanoprost  | 2.079045655 |
| prazosin     | rofecoxib    | 2.062296534 |
| propranolol  | paclitaxel   | 2.047743687 |
| fluoxetine   | pimozide     | 2.040946965 |
| levofloxacin | cladribine   | 2.027702747 |
| alitretinoin | paclitaxel   | 1.976006581 |
| prazosin     | flurbiprofen | 1.97410637  |
| olopatadine  | paclitaxel   | 1.973109483 |
| prazosin     | eplerenone   | 1.973014921 |
| pirfenidone  | cetirizine   | 1.958091484 |
| prazosin     | azelastine   | 1.947878182 |
| prazosin     | azacitidine  | 1.911502951 |
| fluoxetine   | paclitaxel   | 1.904440412 |
| propranolol  | clozapine    | 1.877149323 |
| levofloxacin | rofecoxib    | 1.835087437 |
| alitretinoin | clozapine    | 1.832399562 |
| propranolol  | lamivudine   | 1.791731243 |
| olopatadine  | clozapine    | 1.791599915 |
| levofloxacin | eplerenone   | 1.790751868 |
| levofloxacin | flurbiprofen | 1.783384381 |
| pirfenidone  | pimozide     | 1.758733968 |
| alitretinoin | lamivudine   | 1.744799176 |
| levofloxacin | azelastine   | 1.729793039 |
| levofloxacin | azacitidine  | 1.728838978 |
| nifedipine   | prazosin     | 1.72553218  |
| olopatadine  | lamivudine   | 1.713514632 |
| pirfenidone  | paclitaxel   | 1.692853993 |
| prazosin     | icosapent    | 1.688949747 |
| fluoxetine   | clozapine    | 1.6715448   |
| prazosin     | naproxen     | 1.660103027 |
| vinblastine  | fluvastatin  | 1.649633599 |
| prazosin     | formoterol   | 1.64078027  |
| fluoxetine   | lamivudine   | 1.610388443 |



|              |              |             |
|--------------|--------------|-------------|
| rofecoxib    | fluvastatin  | 1.595523918 |
| rofecoxib    | vinblastine  | 1.587911308 |
| nifedipine   | fluvastatin  | 1.583528314 |
| vinblastine  | cladribine   | 1.579917814 |
| rofecoxib    | cladribine   | 1.517305646 |
| fluvastatin  | cladribine   | 1.515284532 |
| azelastine   | fluvastatin  | 1.512858354 |
| prazosin     | cetirizine   | 1.50916688  |
| azelastine   | vinblastine  | 1.503063094 |
| levofloxacin | icosapent    | 1.502873332 |
| levofloxacin | naproxen     | 1.497520159 |
| flurbiprofen | vinblastine  | 1.49501315  |
| vinblastine  | eplerenone   | 1.486387512 |
| nifedipine   | cladribine   | 1.484094277 |
| flurbiprofen | fluvastatin  | 1.482271037 |
| eplerenone   | fluvastatin  | 1.467402624 |
| nifedipine   | vinblastine  | 1.466589782 |
| levofloxacin | formoterol   | 1.457077921 |
| vinblastine  | azacitidine  | 1.445726473 |
| pirfenidone  | clozapine    | 1.440411078 |
| azelastine   | cladribine   | 1.438178945 |
| azacitidine  | fluvastatin  | 1.431884781 |
| flurbiprofen | cladribine   | 1.413554512 |
| eplerenone   | cladribine   | 1.400645261 |
| pirfenidone  | lamivudine   | 1.397236125 |
| prazosin     | latanoprost  | 1.396921801 |
| nifedipine   | levofloxacin | 1.387639152 |
| azacitidine  | cladribine   | 1.365809633 |
| rofecoxib    | eplerenone   | 1.344210739 |
| levofloxacin | cetirizine   | 1.340200013 |
| rofecoxib    | flurbiprofen | 1.339362092 |
| latanoprost  | fluvastatin  | 1.319031807 |
| icosapent    | fluvastatin  | 1.30667907  |
| rofecoxib    | azelastine   | 1.301563613 |
| vinblastine  | icosapent    | 1.300444605 |
| rofecoxib    | azacitidine  | 1.298232572 |
| flurbiprofen | eplerenone   | 1.282995982 |
| formoterol   | fluvastatin  | 1.27434465  |
| azelastine   | eplerenone   | 1.270117938 |
| vinblastine  | formoterol   | 1.266093687 |
| azelastine   | flurbiprofen | 1.264892436 |
| vinblastine  | naproxen     | 1.259266332 |
| naproxen     | fluvastatin  | 1.250194951 |
| flurbiprofen | azacitidine  | 1.242716141 |
| icosapent    | cladribine   | 1.242621003 |
| eplerenone   | azacitidine  | 1.242029065 |
| prazosin     | paclitaxel   | 1.241106518 |
| latanoprost  | cladribine   | 1.23346462  |
| azelastine   | azacitidine  | 1.226205282 |
| formoterol   | cladribine   | 1.211439021 |
| latanoprost  | vinblastine  | 1.207871722 |
| prazosin     | pimozide     | 1.2059557   |
| naproxen     | cladribine   | 1.191903199 |
| cetirizine   | fluvastatin  | 1.172124491 |
| vinblastine  | cetirizine   | 1.16453537  |
| nifedipine   | eplerenone   | 1.145309764 |
| rofecoxib    | icosapent    | 1.130568733 |

|              |              |             |
|--------------|--------------|-------------|
| rofecoxib    | naproxen     | 1.124851635 |
| cetirizine   | cladribine   | 1.114264768 |
| nifedipine   | flurbiprofen | 1.113839325 |
| pimozide     | fluvastatin  | 1.107018725 |
| levofloxacin | latanoprost  | 1.101334868 |
| eplerenone   | icosapent    | 1.100862243 |
| flurbiprofen | icosapent    | 1.096891368 |
| rofecoxib    | formoterol   | 1.096362143 |
| nifedipine   | azacitidine  | 1.086236651 |
| eplerenone   | naproxen     | 1.079227681 |
| flurbiprofen | naproxen     | 1.07909303  |
| eplerenone   | formoterol   | 1.069874119 |
| azelastine   | icosapent    | 1.065935718 |
| flurbiprofen | formoterol   | 1.065472458 |
| azacitidine  | icosapent    | 1.06320771  |
| azelastine   | naproxen     | 1.062138899 |
| levofloxacin | paclitaxel   | 1.059046013 |
| nifedipine   | rofecoxib    | 1.056175826 |
| azacitidine  | naproxen     | 1.045048463 |
| pimozide     | cladribine   | 1.037483239 |
| paclitaxel   | fluvastatin  | 1.036425327 |
| azelastine   | formoterol   | 1.033454627 |
| azacitidine  | formoterol   | 1.032884629 |
| pimozide     | vinblastine  | 1.025154645 |
| rofecoxib    | cetirizine   | 1.008418655 |
| vinblastine  | paclitaxel   | 0.997933807 |
| prazosin     | clozapine    | 0.987683175 |
| nifedipine   | azelastine   | 0.984204127 |
| eplerenone   | cetirizine   | 0.98405534  |
| flurbiprofen | cetirizine   | 0.980006752 |
| paclitaxel   | cladribine   | 0.978929089 |
| prazosin     | lamivudine   | 0.972862319 |
| levofloxacin | pimozide     | 0.969622805 |
| azelastine   | cetirizine   | 0.950557197 |
| azacitidine  | cetirizine   | 0.950032921 |
| latanoprost  | eplerenone   | 0.93026988  |
| nifedipine   | naproxen     | 0.928230921 |
| icosapent    | naproxen     | 0.921214701 |
| clozapine    | fluvastatin  | 0.906653345 |
| latanoprost  | flurbiprofen | 0.900703951 |
| icosapent    | formoterol   | 0.897882789 |
| formoterol   | naproxen     | 0.894684568 |
| latanoprost  | azacitidine  | 0.879373724 |
| lamivudine   | fluvastatin  | 0.874116549 |
| nifedipine   | icosapent    | 0.864971582 |
| clozapine    | cladribine   | 0.849703467 |
| latanoprost  | rofecoxib    | 0.840289637 |
| vinblastine  | clozapine    | 0.839606293 |
| nifedipine   | formoterol   | 0.82903681  |
| icosapent    | cetirizine   | 0.825860106 |
| cetirizine   | naproxen     | 0.822918426 |
| lamivudine   | cladribine   | 0.820610151 |
| vinblastine  | lamivudine   | 0.816497645 |
| eplerenone   | paclitaxel   | 0.815275442 |
| flurbiprofen | paclitaxel   | 0.80395008  |
| formoterol   | cetirizine   | 0.800694576 |
| pimozide     | eplerenone   | 0.800470085 |

|              |              |             |
|--------------|--------------|-------------|
| rofecoxib    | paclitaxel   | 0.800460672 |
| levofloxacin | clozapine    | 0.794125465 |
| levofloxacin | lamivudine   | 0.793465974 |
| azacitidine  | paclitaxel   | 0.781286726 |
| latanoprost  | azelastine   | 0.781138469 |
| pimozide     | flurbiprofen | 0.778441768 |
| nifedipine   | cetirizine   | 0.762536531 |
| pimozide     | azacitidine  | 0.759158998 |
| azelastine   | paclitaxel   | 0.751144457 |
| latanoprost  | naproxen     | 0.749529033 |
| rofecoxib    | pimozide     | 0.738027287 |
| latanoprost  | icosapent    | 0.688168238 |
| azelastine   | pimozide     | 0.687719689 |
| paclitaxel   | naproxen     | 0.672977019 |
| latanoprost  | formoterol   | 0.657986008 |
| eplerenone   | clozapine    | 0.655588622 |
| icosapent    | paclitaxel   | 0.655549688 |
| pimozide     | naproxen     | 0.648714478 |
| eplerenone   | lamivudine   | 0.644181737 |
| flurbiprofen | clozapine    | 0.637547331 |
| formoterol   | paclitaxel   | 0.632720781 |
| flurbiprofen | lamivudine   | 0.628499262 |
| azacitidine  | clozapine    | 0.621754655 |
| azacitidine  | lamivudine   | 0.612424804 |
| latanoprost  | cetirizine   | 0.605206381 |
| rofecoxib    | clozapine    | 0.604447688 |
| pimozide     | icosapent    | 0.604418899 |
| rofecoxib    | lamivudine   | 0.602909313 |
| paclitaxel   | cetirizine   | 0.581967777 |
| pimozide     | formoterol   | 0.579295414 |
| azelastine   | clozapine    | 0.563245537 |
| azelastine   | lamivudine   | 0.562777784 |
| pimozide     | cetirizine   | 0.532827867 |
| clozapine    | naproxen     | 0.531300093 |
| naproxen     | lamivudine   | 0.524313001 |
| icosapent    | clozapine    | 0.495021813 |
| icosapent    | lamivudine   | 0.493761937 |
| formoterol   | clozapine    | 0.474445565 |
| formoterol   | lamivudine   | 0.474051557 |
| nifedipine   | paclitaxel   | 0.46152181  |
| clozapine    | cetirizine   | 0.436388434 |
| cetirizine   | lamivudine   | 0.436026031 |
| latanoprost  | paclitaxel   | 0.34257261  |
| pimozide     | paclitaxel   | 0.322294559 |
| paclitaxel   | lamivudine   | 0.275860477 |
| clozapine    | paclitaxel   | 0.263960702 |
| nifedipine   | lamivudine   | 0.220861803 |
| nifedipine   | pimozide     | 0.220181107 |
| nifedipine   | clozapine    | 0.180329323 |
| nifedipine   | latanoprost  | 0.171196464 |
| pimozide     | lamivudine   | 0.154006502 |
| latanoprost  | lamivudine   | 0.136502798 |
| clozapine    | lamivudine   | 0.126132022 |
| pimozide     | clozapine    | 0.125626972 |
| latanoprost  | pimozide     | 0.11898828  |
| latanoprost  | clozapine    | 0.097451939 |

**Supplemental Table S3. Top centrality genes in BRAF melanoma signaling networks.** The top ten genes in the BRAF melanoma signaling network ranked by centrality score (Left) and top ten genes interacting with either vemurafenib or tretinoin ranked by centrality score (R) are shown below. The centrality score (average of closeness, betweenness and PageRank centrality metrics) is reported for each gene and the log<sub>2</sub>-fold change for all significantly differentially expressed genes in A375 melanoma cells treated with the vemurafenib+tretinoin combination relative to vehicle control (adjusted P<0.05, Benjamini-Hochberg correction); ns = not statistically significant.

| Network Gene<br>(Overall Centrality) | Centrality Score | log <sub>2</sub> -Fold Change<br>(p.adj<0.05) | Network Gene<br>(Drug Interaction) | Centrality Score | log <sub>2</sub> -Fold Change<br>(p.adj<0.05) |
|--------------------------------------|------------------|-----------------------------------------------|------------------------------------|------------------|-----------------------------------------------|
| NTRK1                                | 0.685            | -1.361                                        | AKT1                               | 0.670            | -0.536                                        |
| AKT1                                 | 0.670            | -0.536                                        | FN1                                | 0.499            | -0.681                                        |
| YWHAZ                                | 0.630            | -0.502                                        | JUP                                | 0.464            | ns                                            |
| VIM                                  | 0.584            | ns                                            | CDK2                               | 0.456            | ns                                            |
| NPM1                                 | 0.565            | -0.366                                        | CDH1                               | 0.445            | ns                                            |
| CTNNB1                               | 0.564            | -0.430                                        | PARP1                              | 0.418            | -0.282                                        |
| ELAVL1                               | 0.544            | -0.543                                        | BRAF                               | 0.380            | ns                                            |
| YBX1                                 | 0.525            | ns                                            | ICAM1                              | 0.372            | ns                                            |
| KRT10                                | 0.504            | ns                                            | LMNA                               | 0.366            | -0.801                                        |
| FN1                                  | 0.499            | -0.681                                        | RAC1                               | 0.365            | -0.406                                        |

## Supplemental Results

### *Evaluation of key assumptions underlying signaling network construction and drug combination predictions*

The first assumption of our network models that we examine is that the network structure is dependent, in part, on the collection of root genes and is not biased to an individual gene. To evaluate the stability of the network structures using the belief propagation algorithm, we performed a leave-one-out analysis for each root gene in two examples of generalized melanoma networks constructed using root genes from two sources: melanoma-associated genes in the DisGeNET (DGN) database (n=39 root genes) and significantly mutated genes (SMG) across the TCGA SKCM melanoma patient cohort (n=28 root genes). Both root gene lists were applied the same gene expression signature defined by primary melanoma tumors vs. normal skin samples from the GEO GSE15605 dataset. As is shown in **Figure S4**, the removal of individual root genes had a minimal effect on the original networks, where 98.5% and 98.8% of the network interactions are retained in the DGN (n=140 interactions) and SMG (n=165 interactions) networks, respectively.

Next, we sought to compare different algorithms used to cluster drugs into communities based on similarity matrices of drug-induced gene expression profiles. Therefore, we selected several clustering algorithms designed for analysis of similarity matrices: affinity propagation (AP), partitioning around medoids, hierarchical clustering and density-based clustering of applications with noise (DBSCAN). To compare the clustering results of each algorithm, we employed three internal measures to assess the optimal network structures to be maximized: average between cluster distance/within cluster distance, Dunn 2 index (minimum average dissimilarity between two clusters / maximum average within cluster similarity), average silhouette width (estimates average distance between clusters); as well as one internal measure to be minimized: within cluster sum of squares (**Figure S5**). We observed that the affinity

propagation algorithm exhibited the smallest cluster sum of squares and largest average between cluster distance/within cluster distance measure, while also demonstrating a comparably high Dunn 2 index and positive average silhouette width. These results support the use of the affinity propagation algorithm in our analysis to cluster drug communities. We provide two example visualizations of drug community clustering by the affinity propagation algorithm in **Figure S6** for drugs predicted for two generalized melanoma networks using the DGN and SMG root gene sets as described above. To determine if the drug communities clustered by the AP algorithm revealed functional similarities, we mapped each drug to mechanism classes from the KEGG DRUG database. We found that the majority of drugs clustered in the same community shared a common drug class, where drugs within each community exhibited an average of 54% and 52% drugs sharing a common class for the SMG and DGN networks, respectively.

We then examined the effects of several parameters on drug predictions. We found for signaling networks generated for each melanoma genomic subtype that, as expected, increasing lambda increased the signaling network size. In general, increasing lambda also increased the number of predicted drug combinations (**Figure S7**). However, for the *NF1* and TWT networks, the number of drug combinations plateaued at lambda = 0.025, and therefore we selected this parameter value to apply to all signaling networks for this study for consistency of comparisons. We then assessed the specificity of drug combination predictions for each major genomic subtype. We compared the results for each of the original subtype-specific melanoma signaling networks against those generated for two generalized melanoma networks (DGN, SMG) and random drug pairs. Of note, random drug combinations were selected from a set corresponding to the intersection of the validation dataset testing drug combinations across all four genomic backgrounds as well as the same set of all FDA approved therapies modeled in our method (**Figure S8A**). For each melanoma genomic subtype, we observed a higher positive

predictive value (PPV) as compared to either generalized model (SMG, DGN) or randomized drug pairs.

We next sought to determine if either the significantly mutated root genes or differentially expressed genes alone could account for the drug combination prediction results. We compared the number of validated drug combinations from the Bliss synergy matrix of melanoma cell lines representing each of the genomic backgrounds (48) using the original signaling networks, root genes only and differentially expressed (DE) genes only (**Figure S8B**). Overall, our approach integrating differentially expressed genes and root genes performed better than using either data type alone. In fact, for *NRAS*, *NF1* and TWT networks, none of the validated drug combinations were recovered when using the differentially expressed genes alone. With the exception of the TWT network, the integrated network performed better than using root genes alone to predict the validated drug combinations.

Finally, we investigated the impact of re-wiring the signaling networks on predicting validated drug combinations to determine whether the results could be explained solely by the collection of genes involved in the network or if the specific interactions between the genes were more influential. Therefore, we generated random interaction pairs among the original genes for the *BRAF* signaling network (n= 100 permutations) fixing the same number of genes as in the original network. We found that the original interaction pairings for the *BRAF* signaling network resulted in the highest number of true positives, and that only 6/100 other random networks returned as few false positives (**Figure S9**).

## Supplemental Methods

### *Cell line information*

A375 melanoma cells were obtained from American Type Cell Culture Collection and maintained in DMEM with 10% FBS, penicillin/streptomycin and plasmocin.

### *Drug reagents*

Vemurafenib 10mM/1mL in DMSO (S1267), tretinoin 10mM/1mL in DMSO and powder formulation (S1653) dissolved in DMSO were obtained from Selleckchem (Houston, TX, USA). Powder formulation of vemurafenib (202271) was purchased from MedKoo (Morrisville, NC, USA).

### *In vitro cell proliferation and viability assays*

Cells were seeded in 96 well plates at a density of 5,000 cells/well. Proliferation of melanoma cells was measured in triplicate in 96 well plates via CellTiter 96 Aqueous MTS Cell Proliferation Assay kit (Promega) using 20 $\mu$ l/well as absorbance at 490 nm (Biotek Epoch instrument, Gen 5 software). The number of viable cells in culture was determined by quantitation of ATP present via CellTiter-Glo<sup>®</sup> Luminescent Cell Viability Assay kit (Promega) according to manufacturer's instructions using Vertias<sup>™</sup> microplate luminometer (Turner BioSystms, Inc.).

### *In vitro cell death assays*

Cell cytotoxicity was measured in triplicate by CellTox<sup>™</sup> Green Cytotoxicity Assay kit (Promega) using the manufacturer's Endpoint Assay Protocol and SpectraMax M2 fluorescence plate reader (Molecular Devices) with recommended excitation and emission wavelengths (490/520). Apoptosis-induced phosphatidylserine exposure and cell membrane integrity following drug treatment were measured in triplicate in melanoma cells by flow cytometric analysis using APC-Annexin V and PE-PI (BD Pharmigen). The corresponding gating strategy and representative flow cytometry scatterplots are visualized in **Supplemental Figure S14**



Enzymatic activity of caspase-3/7 was measured in duplicate using the Apo-ONE® Homogenous Caspase-3/7 Assay kit (Promega) according manufacturer's instructions and SpectraMax M2 fluorescence plate reader (Molecular Devices) with optimized excitation and emission wavelength settings (485/530).

### *In vivo studies*

Female 11-week old athymic NCr-nu/nu mice (Charles River Laboratories, Inc., Strain #553) were used for tumor growth studies. A375 melanoma cells ( $1.0 \times 10^6$  cells) were suspended in PBS and were injected in the left and right flanks subcutaneously. Mice were weighed, and tumors were monitored for growth every other day. Subcutaneous tumor volumes were calculated via caliper measurement as follows: tumor volume =  $0.5 \times ((\text{large diameter}) \times (\text{small diameter})^2)$ . Mice were randomized to drug treatment groups (n=8 mice/group) while maintaining proportional initial tumor size distributions. Drug treatments began on day 10 when tumors had grown 1,000 mm<sup>3</sup> in size. Powder formulations of vemurafenib and tretinoin were dissolved in 20% PEG-400 (v/v) + 5% TPGS (v/v) + 75% ddH<sub>2</sub>O. Vemurafenib alone (50 mg/kg), tretinoin alone (10 mg/kg), vemurafenib+tretinoin combination or vehicle (10 mg/kg) was administered daily by oral gavage 6 days/week. Treatments continued for 15 days, at which time mice were sacrificed and tumors were weighed. Of note, one mouse designated for the combination group was excluded because the original tumor grew rapidly and ulcerated, which violated the ULAR institutional ethical guidelines, and was sacrificed 1 week post-tumor injection prior to drug administration. Resected tumors were fixed for 24 hours in 10% buffered formalin at 4°C, rinsed in ddH<sub>2</sub>O and stored in histocassettes in 70% EtOH at 4°C. Formalin-fixed tumor sections were stained with hematoxylin and eosin, and immunohistochemical stains for Ki67 (1:100, Clone SP6, ThermoFisher Scientific) and cleaved caspase 3 (1:180 Clone D175, Cell Signaling) using a Dako Autostainer Universal Staining System. In brief, after deparaffinization, antigen retrieval was performed with heating to 125°C. Blocking was performed with 3%

hydrogen peroxide followed by a serum free protein block. Slides were incubated at room temperature for 30 minutes in primary antibody. Slides were then incubated with biotinylated goat anti-rabbit (1:200, Vector) for 30 minutes followed by Vector RTU ABC Elite complex for 30 minutes. Probes were then detected with chromogen (DAB), and counterstained with hematoxylin. Images of tumor tissue were taken at 400x magnification. Immunohistochemical staining was scored using an immunoreactive scoring system, defined by the product of two semi-quantitative scores assessing staining intensity and percentage of positive cells (1-3).

### *RNA-seq analysis*

A375 cells were plated in 100mm<sup>3</sup> dishes at a seeding density of 2.2 10<sup>6</sup> cells and incubated at 37deg for 24 h before drug treatment. Drug treatments were applied in triplicate per condition: DMSO (5uM), tretinoin (5uM), vemurafenib (5uM), vemurafenib+tretinoin combination (5uM). Cells were harvested 8 hours after drug treatment with cold PSB and pellets were kept frozen at -80 deg. Total RNA was extracted using the Norgen Biotek total RNA purification plus kit (Cat #48300). RNA purity was assessed using Qubit RNA assay and BioAnalyzer RNA Nanochip tracings. RNA libraries were prepared for sequencing using the New England Biolabs NEBNext Ultra II Directional RNA Library Prep Kit for Illumina with the protocol for use with NEBNext Poly(A) mRNA magnetic isolation module. We used 200ng of total RNA for the construction of sequencing libraries. Paired-end (150bp) sequence reads were generated using the Illumina HiSeq 4000. Illumina HCS 3.4.0 software was used for basecalling. Sequenced reads were mapped to the human genome GRCh38p.10 GENCODE primary assembly GTF v27 and FASTA files using the STAR program (2.5.3a). We used the following protocol from Love *et al* for the R programming language to count reads, generate visualizations of the data and determine differentially expressed genes:

<http://www.bioconductor.org/help/workflows/rnaseqGene/>. Read counts were calculated from aligned bam files using the *summarizeOverlaps* function in the *GenomicAlignments* R package

with the following parameters: mode="Union", singleEnd=FALSE, ignore.strand=TRUE, fragments=TRUE. We used rlog-transformed count data for exploratory data analysis and generation visualizations, including heat maps, principal component analysis and multi-dimensional scaling plots using the *ggplot2* package. The *DESeq2* package was used for differential gene expression analysis, which uses an empirical Bayes shrinkage method for log fold-change estimation and the Wald test for significance testing. Finally, the Benjamini-Hochberg (False Discovery Rate) method was used to correct p-values for multiple hypothesis testing, where an adjusted  $P < 0.05$  cutoff was used to prioritize differentially expressed genes. Raw and processed RNAseq data is available in the GEO database under accession number GSE109731.

### *Statistics*

Statistical analyses were performed using GraphPad Prism (v 7.03) software. Statistical significance of mean group difference was determined by two-tailed Student's t test, and  $P \leq 0.05$  was determined as the threshold for statistical significance. Cell proliferation experiments drug combination synergy was assessed using the Chou-Talalay method using CompuSyn software (4). Survival analyses were conducted via the cBioPortal (5) and PROGgene2 (6) tools using the log-rank statistic.

## Supplemental References

1. Fedchenko N, Reifenrath J. Different approaches for interpretation and reporting of immunohistochemistry analysis results in the bone tissue - a review. *Diagnostic pathology*. 2014;9:221.
2. Leng Y, Yi M, Fan J, Bai Y, Ge Q, Yao G. Effects of acute intra-abdominal hypertension on multiple intestinal barrier functions in rats. *Scientific reports*. 2016;6:22814.
3. Remmele W, Stegner HE. [Recommendation for uniform definition of an immunoreactive score (IRS) for immunohistochemical estrogen receptor detection (ER-ICA) in breast cancer tissue]. *Der Pathologe*. 1987;8(3):138-40.
4. Chou TC. Drug combination studies and their synergy quantification using the Chou-Talalay method. *Cancer research*. 2010;70(2):440-6.
5. Cerami E, Gao J, Dogrusoz U, Gross BE, Sumer SO, Aksoy BA, et al. The cBio cancer genomics portal: an open platform for exploring multidimensional cancer genomics data. *Cancer discovery*. 2012;2(5):401-4.
6. Goswami CP, Nakshatri H. PROGgeneV2: enhancements on the existing database. *BMC cancer*. 2014;14:970.
